# Supplementary material
Source: bioRxiv or medRxiv preprint supplement (https://www.biorxiv.org/content/biorxiv/early/2020/08/10/2020.08.10.244384.1/DC2/embed/media-2.pdf)

# Identification of sub-genus groups

- Phylogenetic tree of 64 genera with >5 ASVs plotted against variance explained by host species and nitrogen
- Sub-genus groups were identified for 12 genera

Genera with sub-genus groups

# Burkholderia

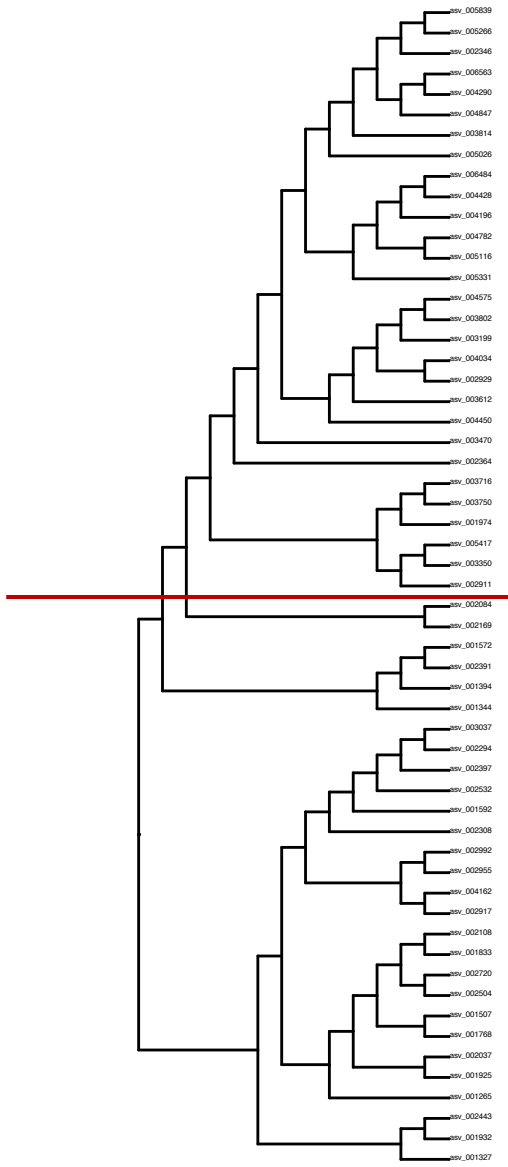

Burkholderia\_S1

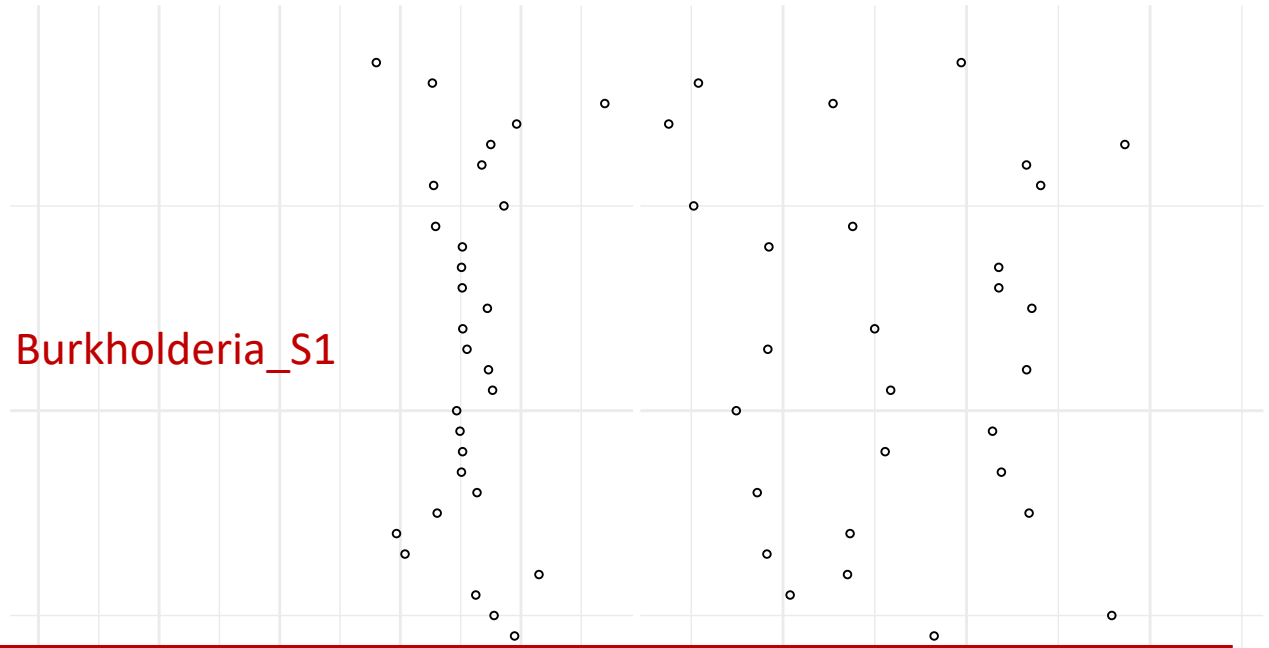

Burkholderia\_S2

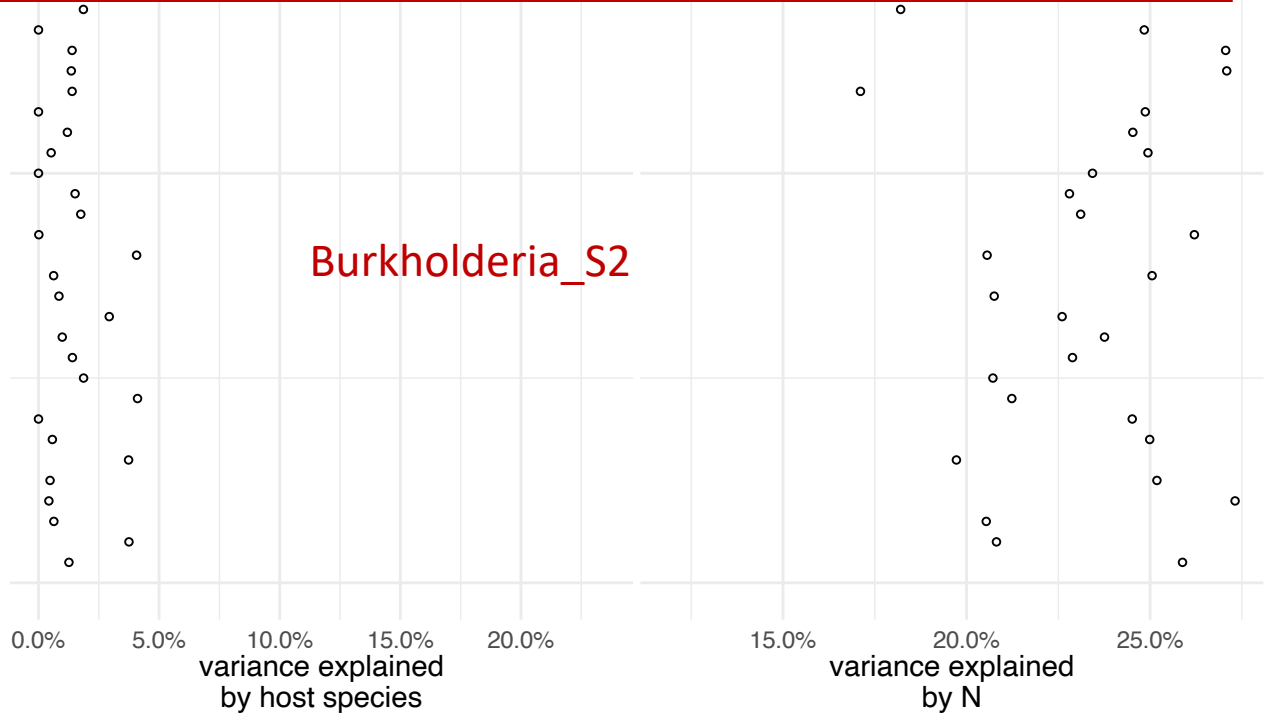

# Chitinophaga

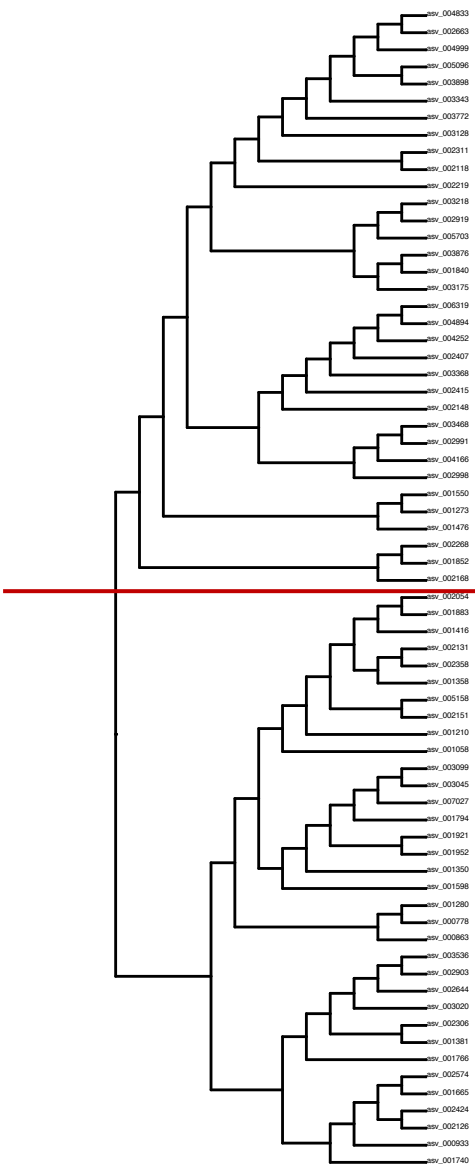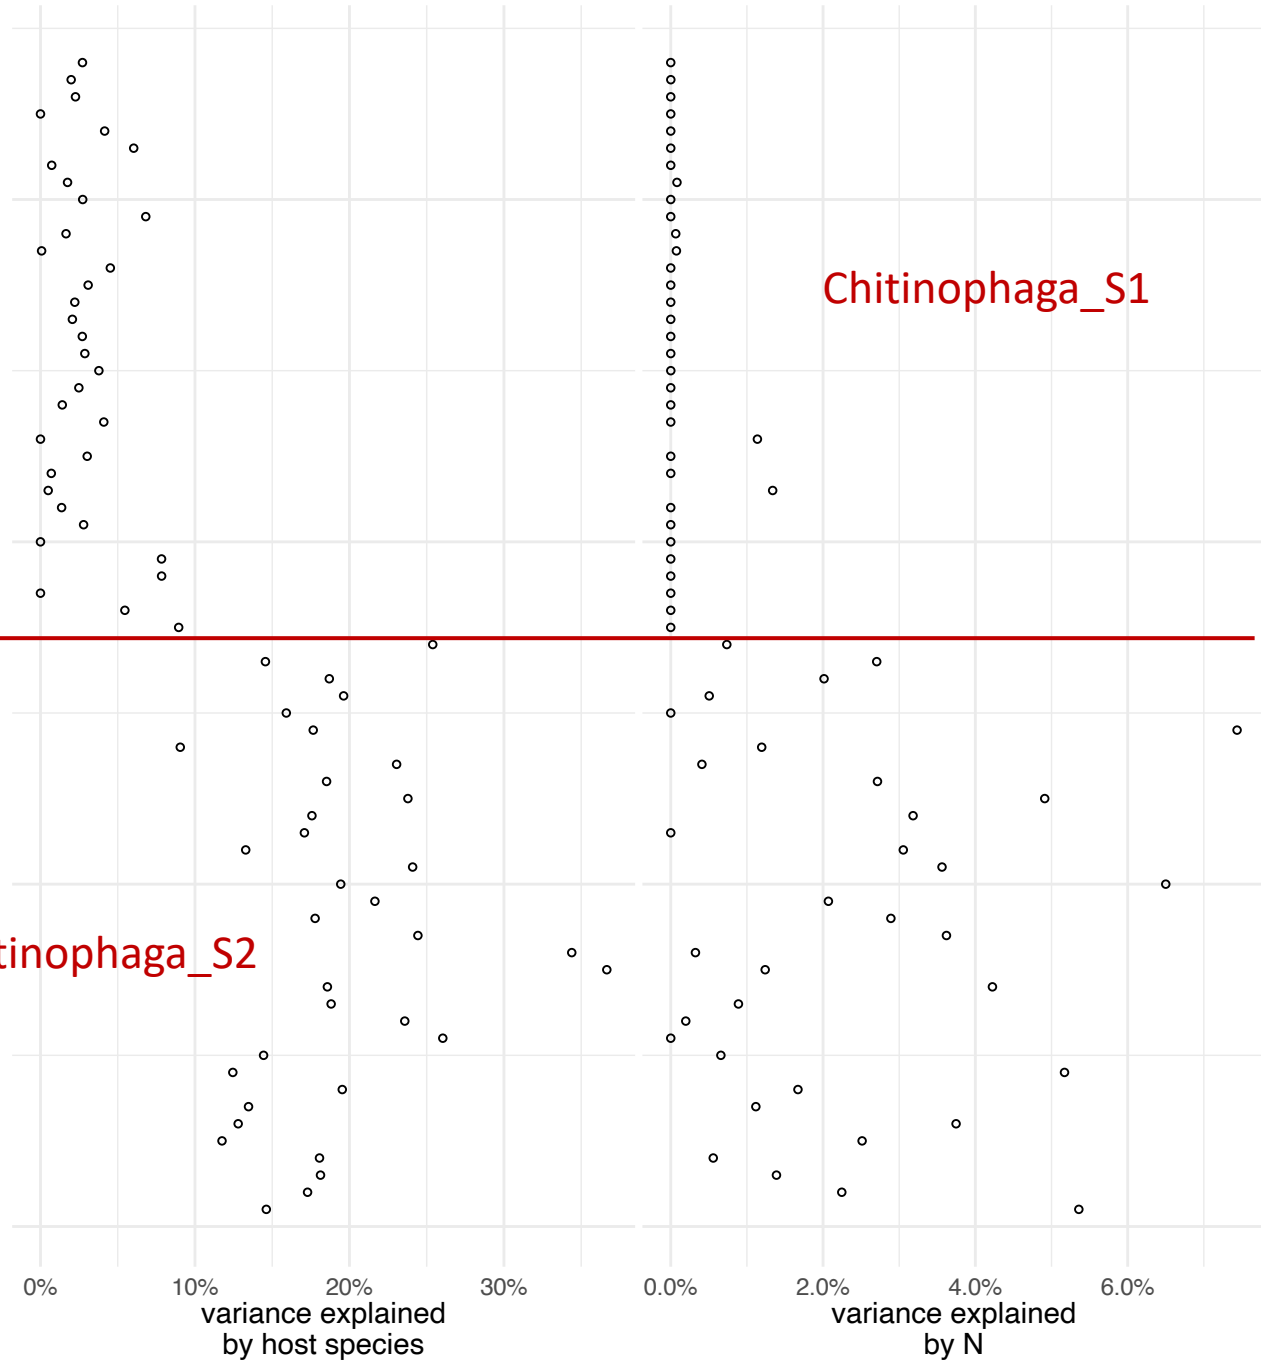

# Flavobacterium

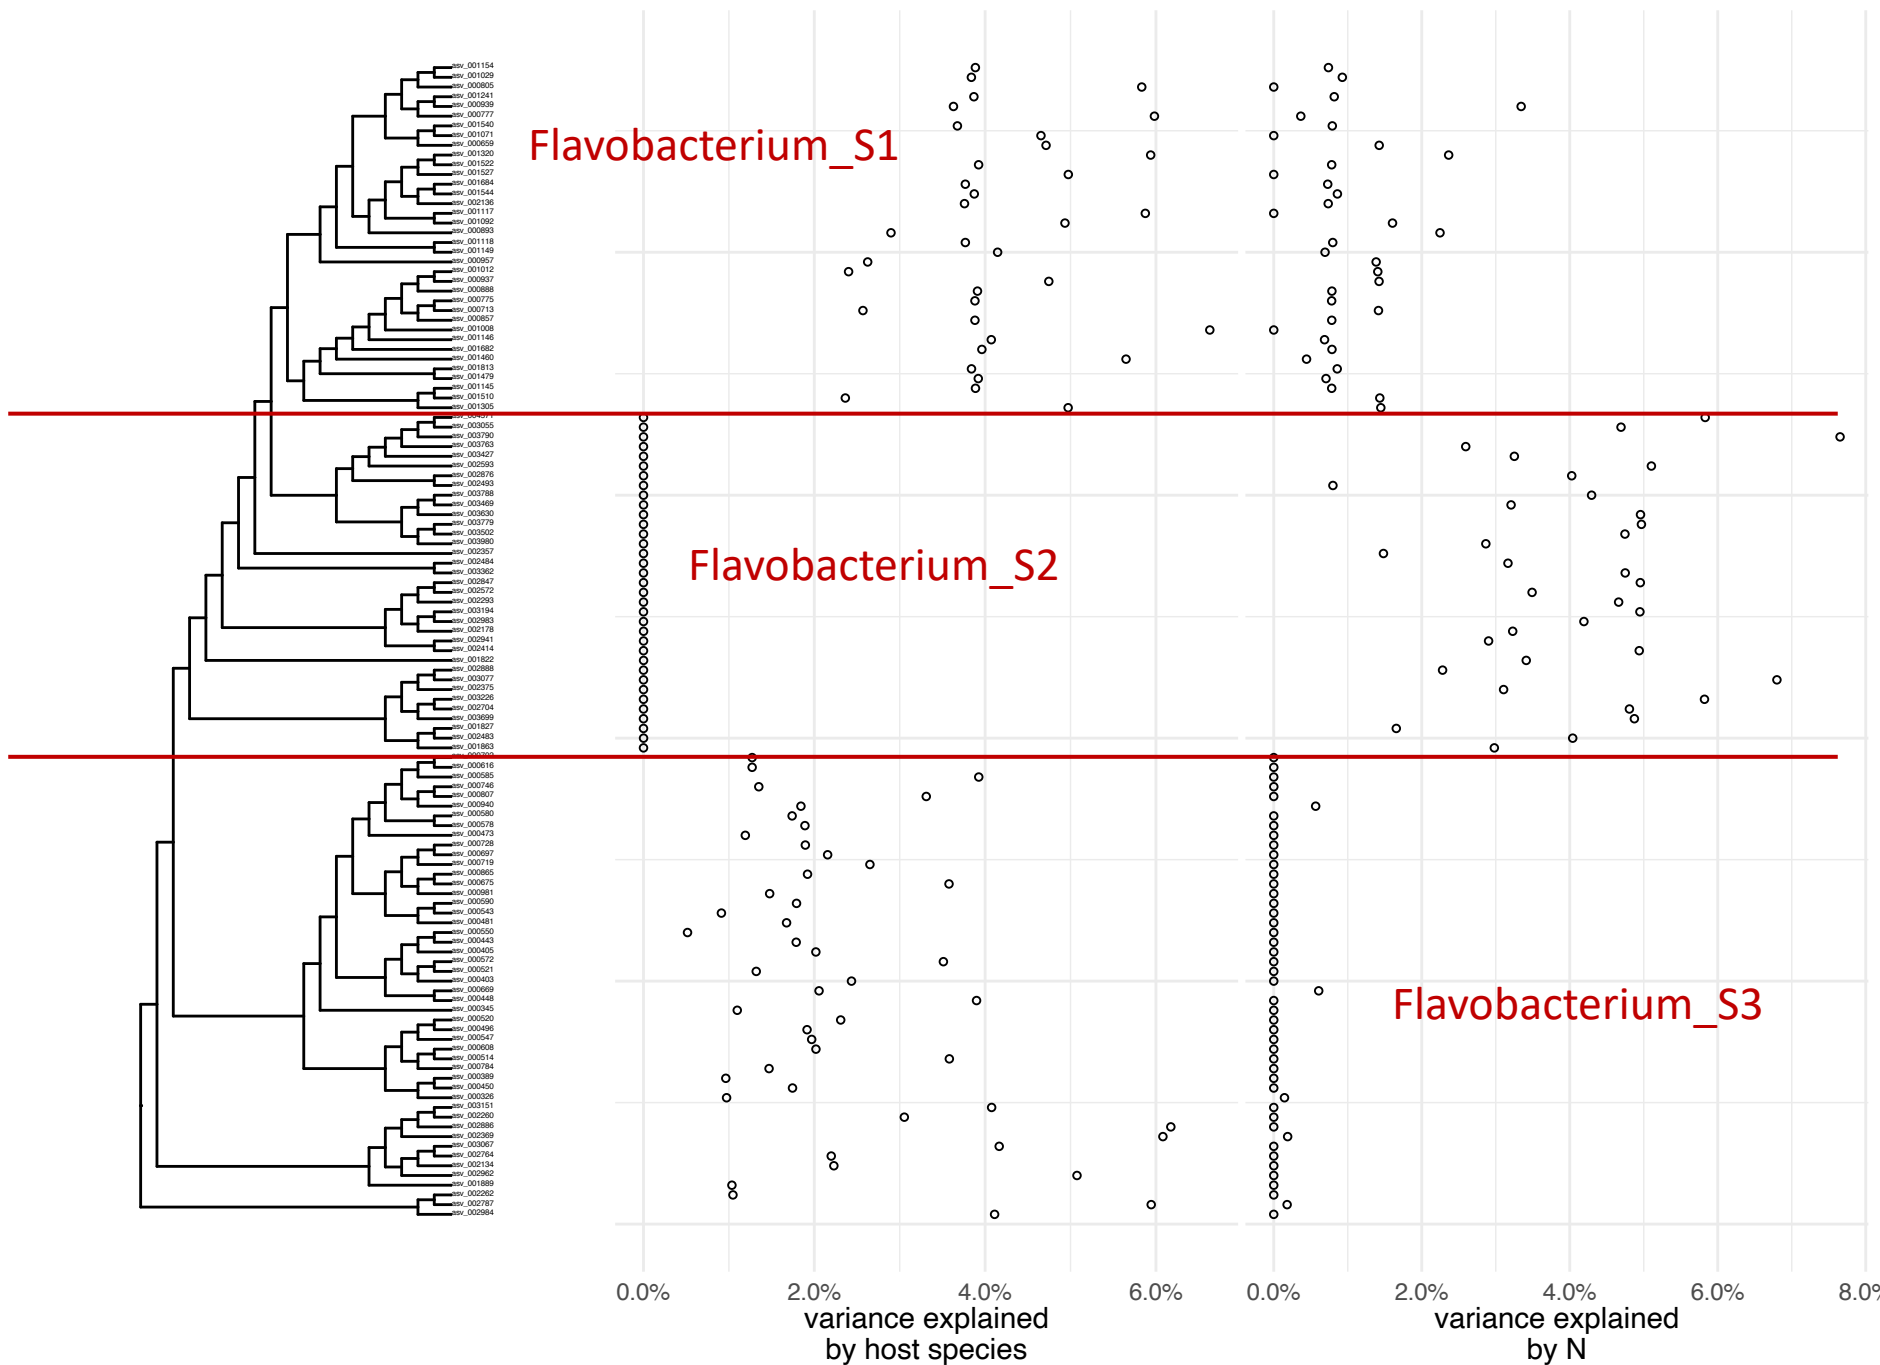

# Mesorhizobium

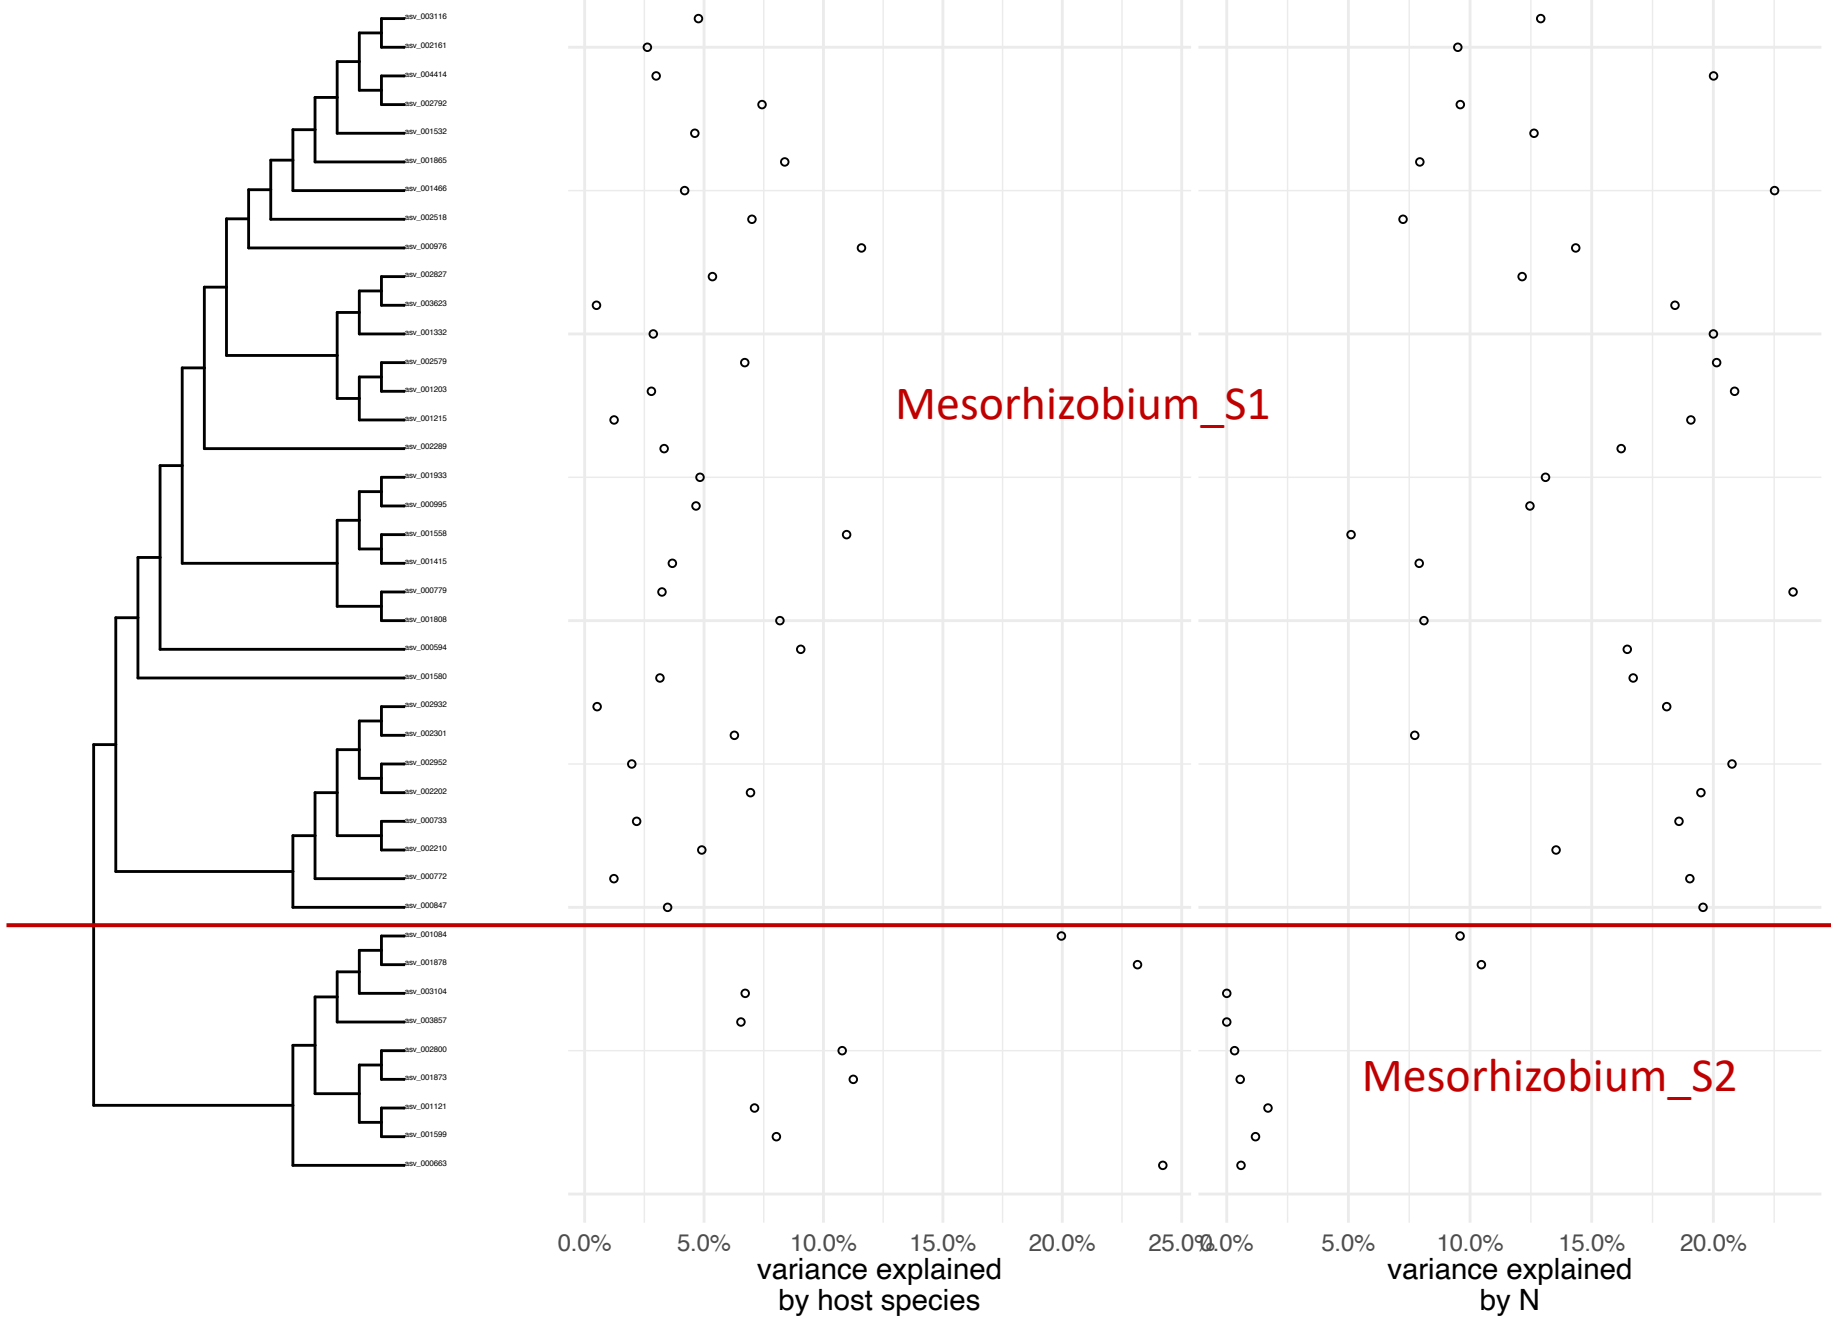

# Mucilaginibacter

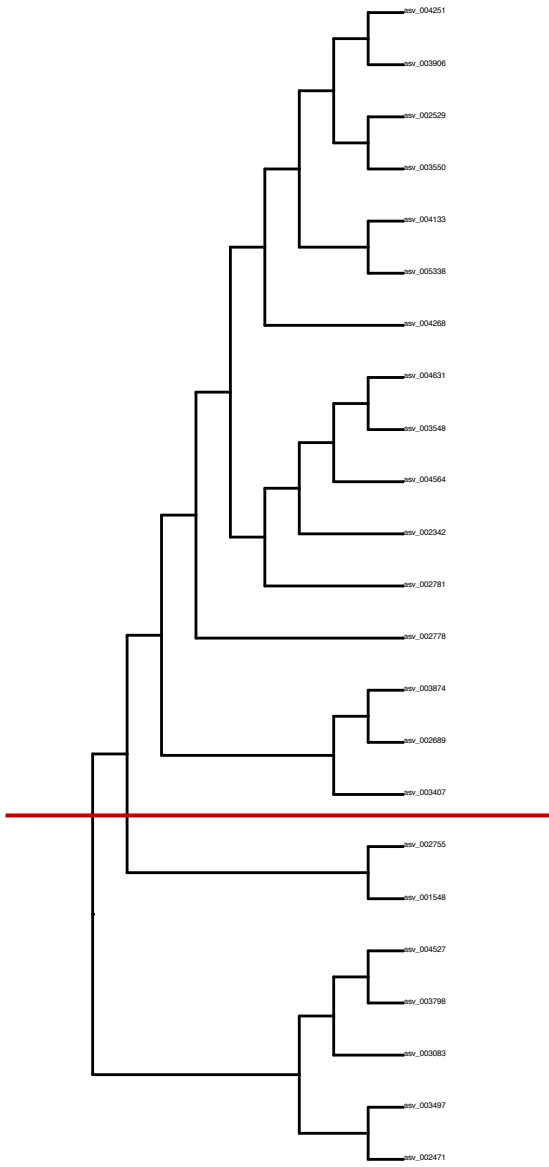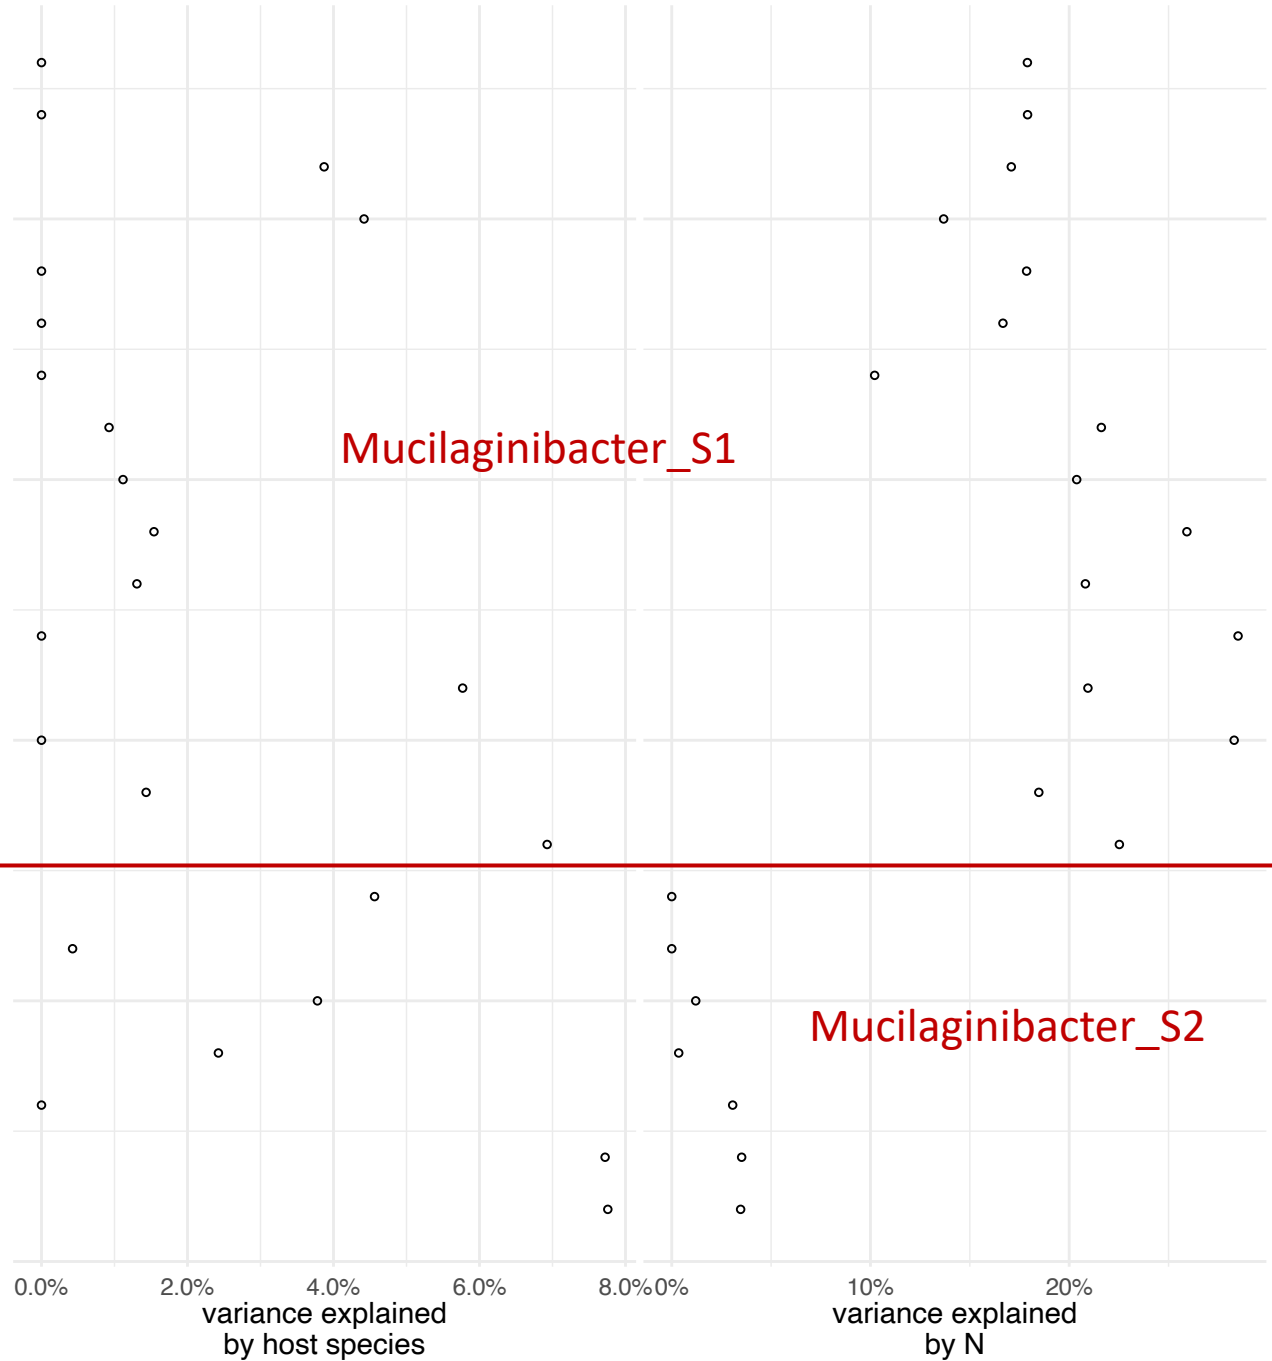

# Nitrobacter

Nitrobacter\_S1

Nitrobacter\_S2

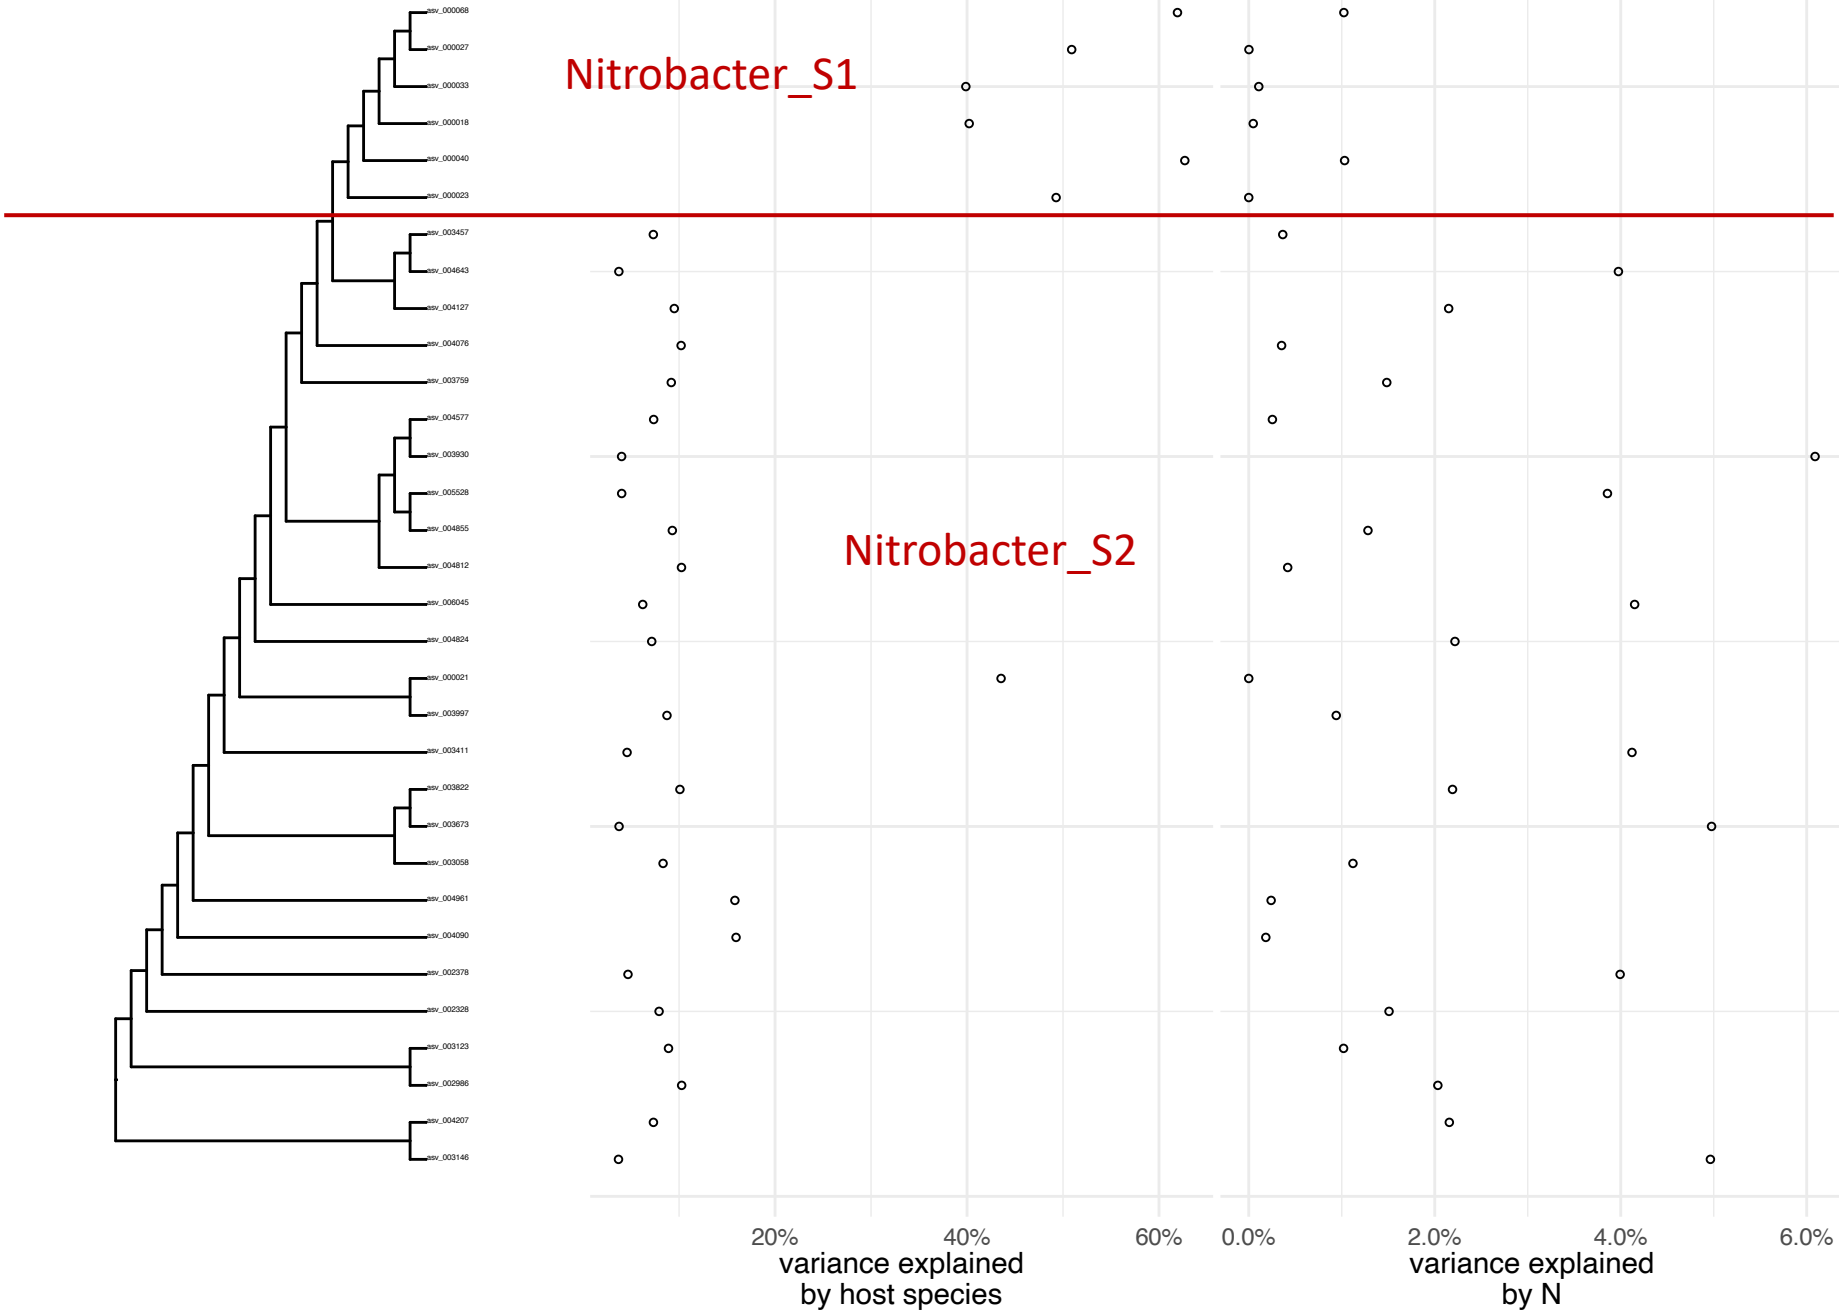



# Pedobacter

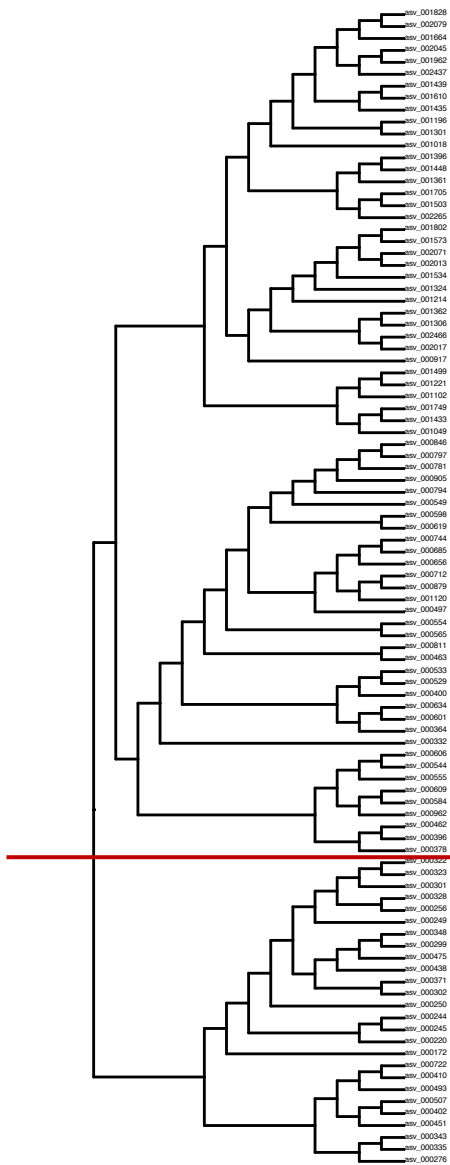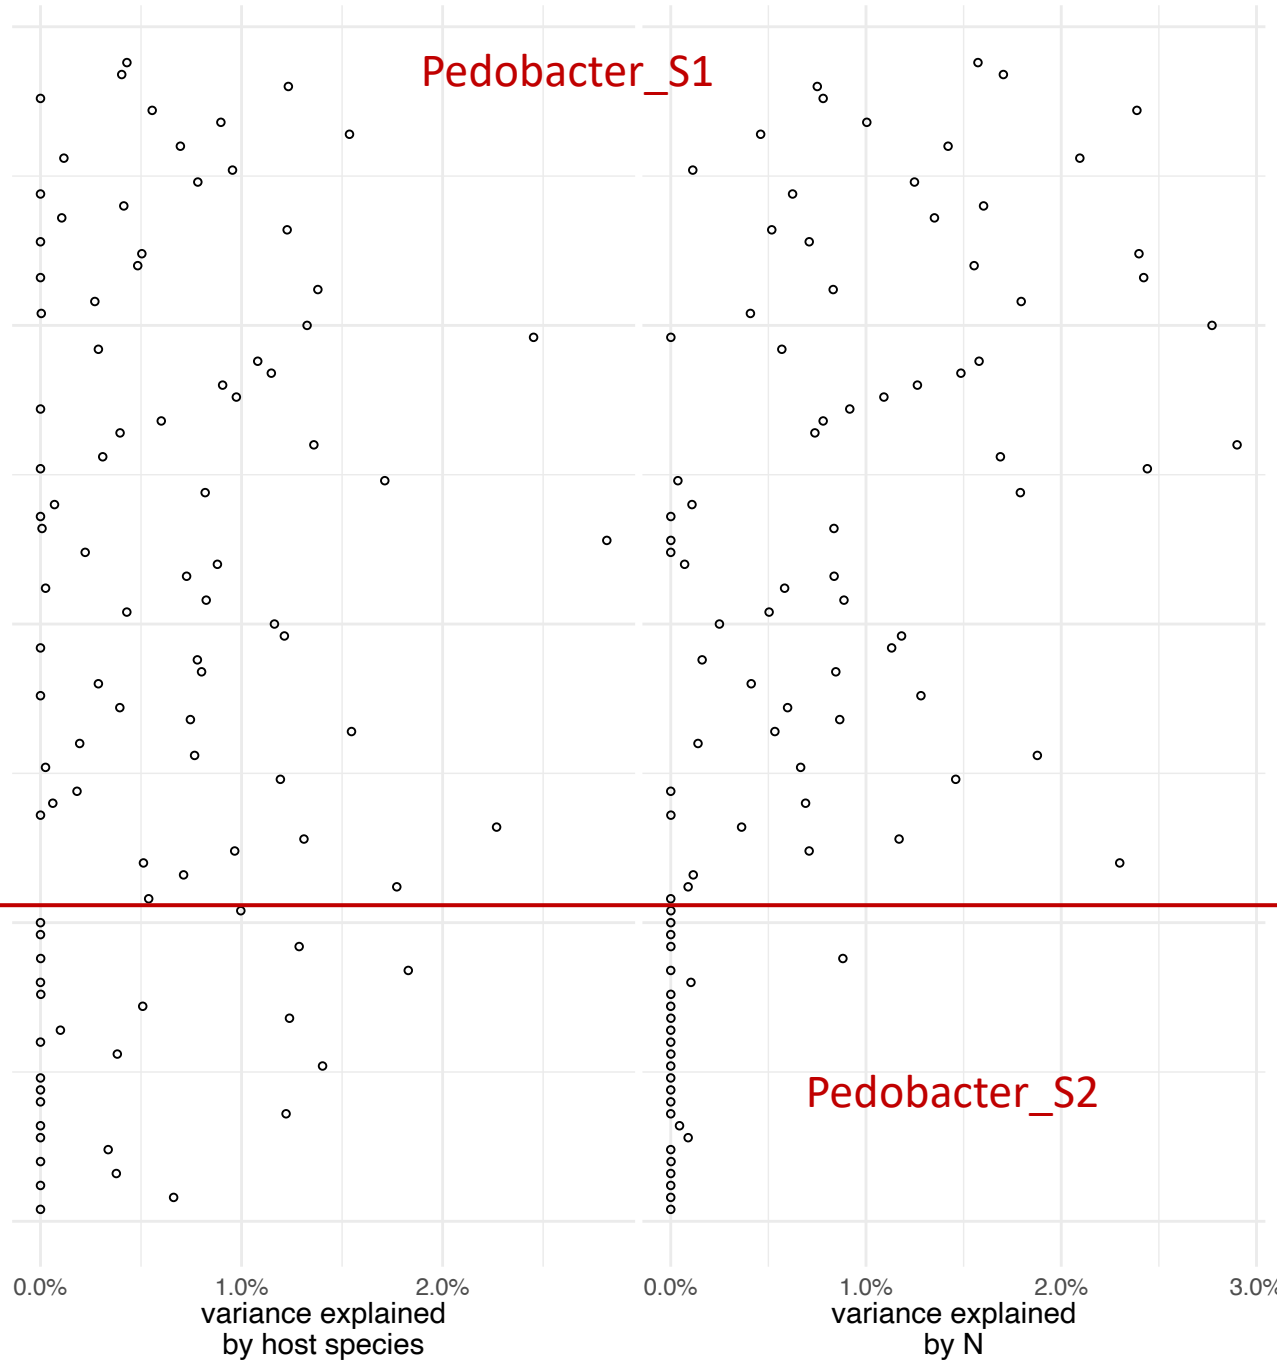

# Pseudomonas

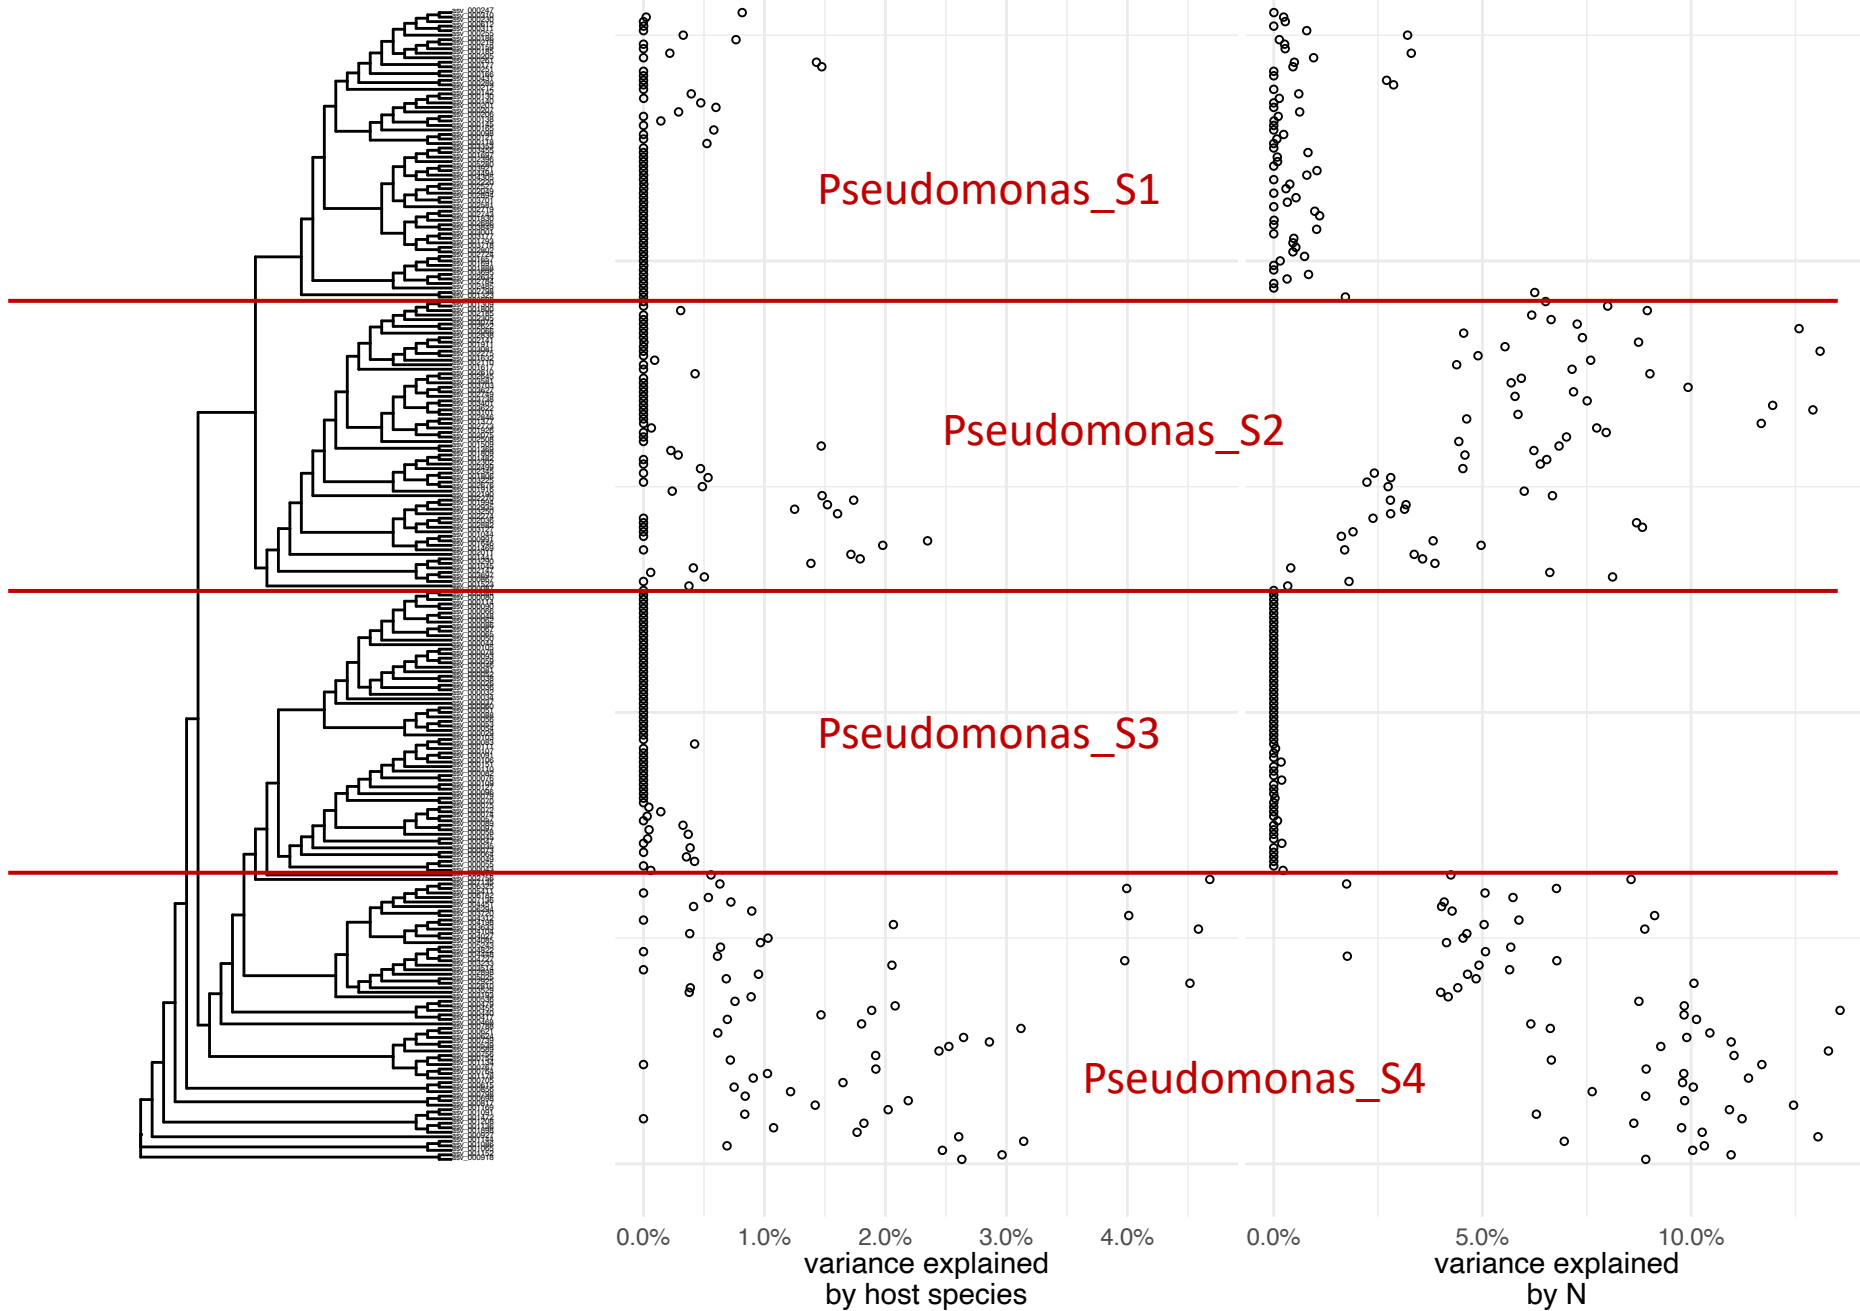

# RB41

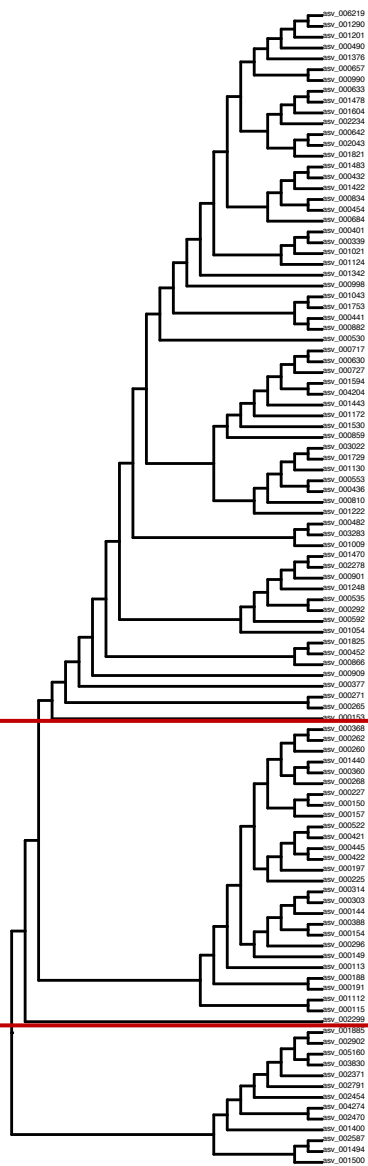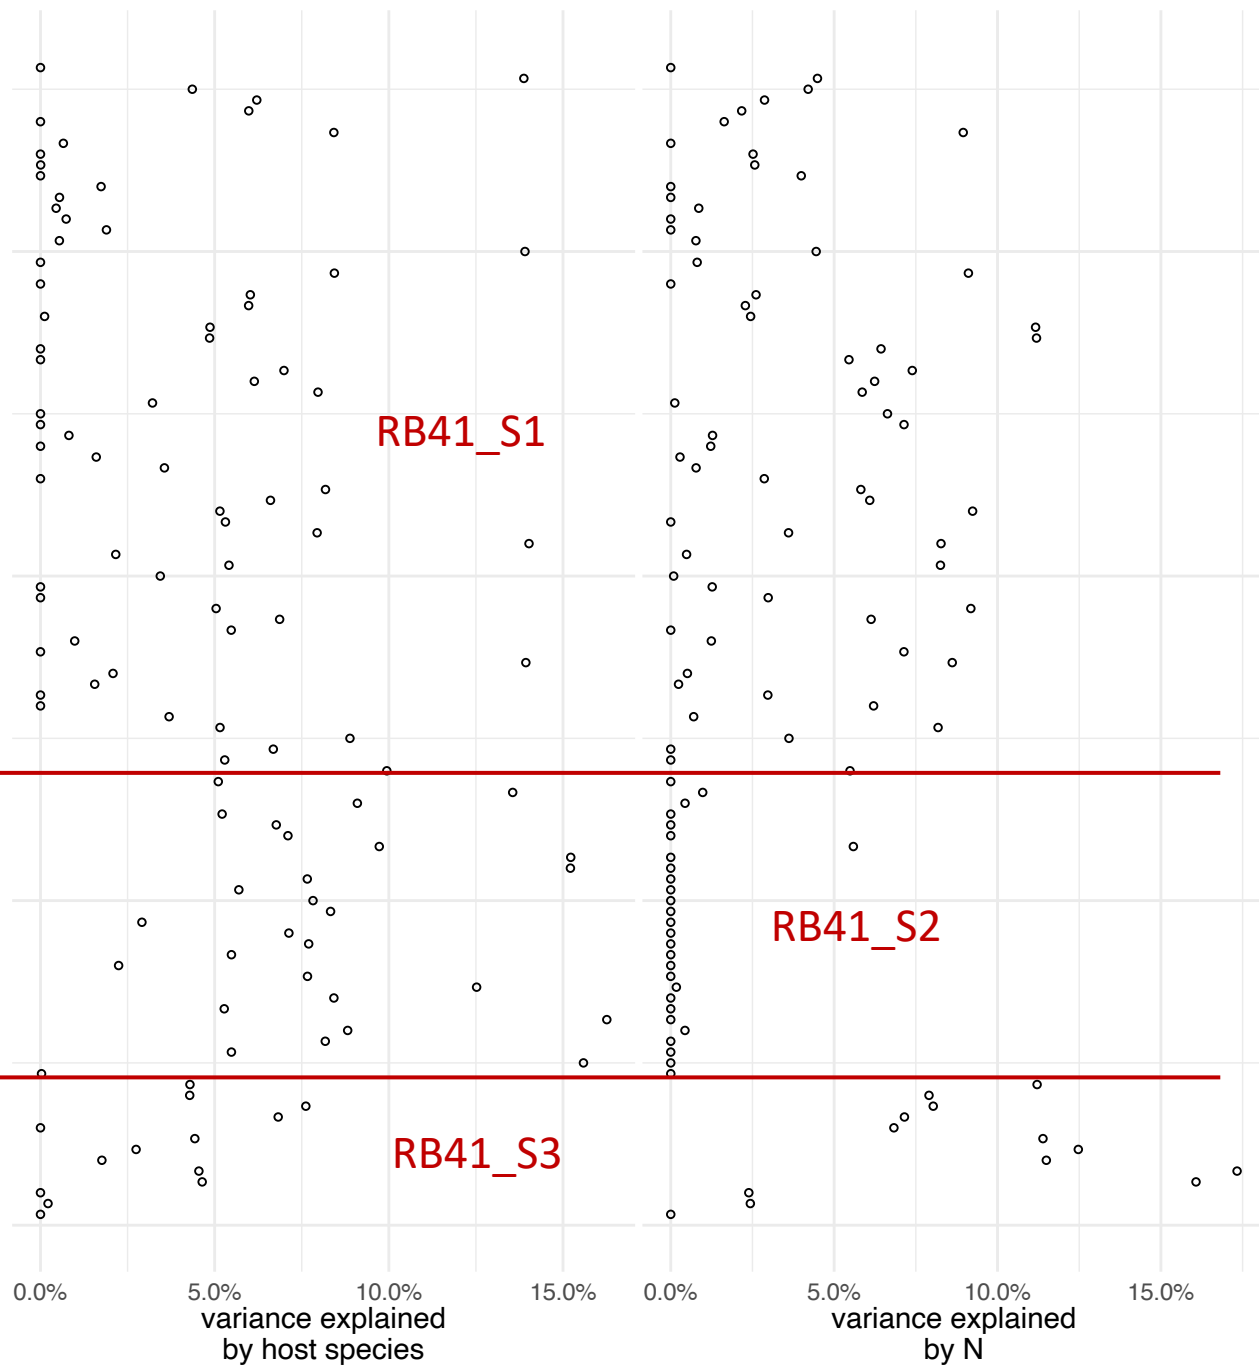

RB41\_S1

RB41\_S2

RB41\_S3

# Spingobium

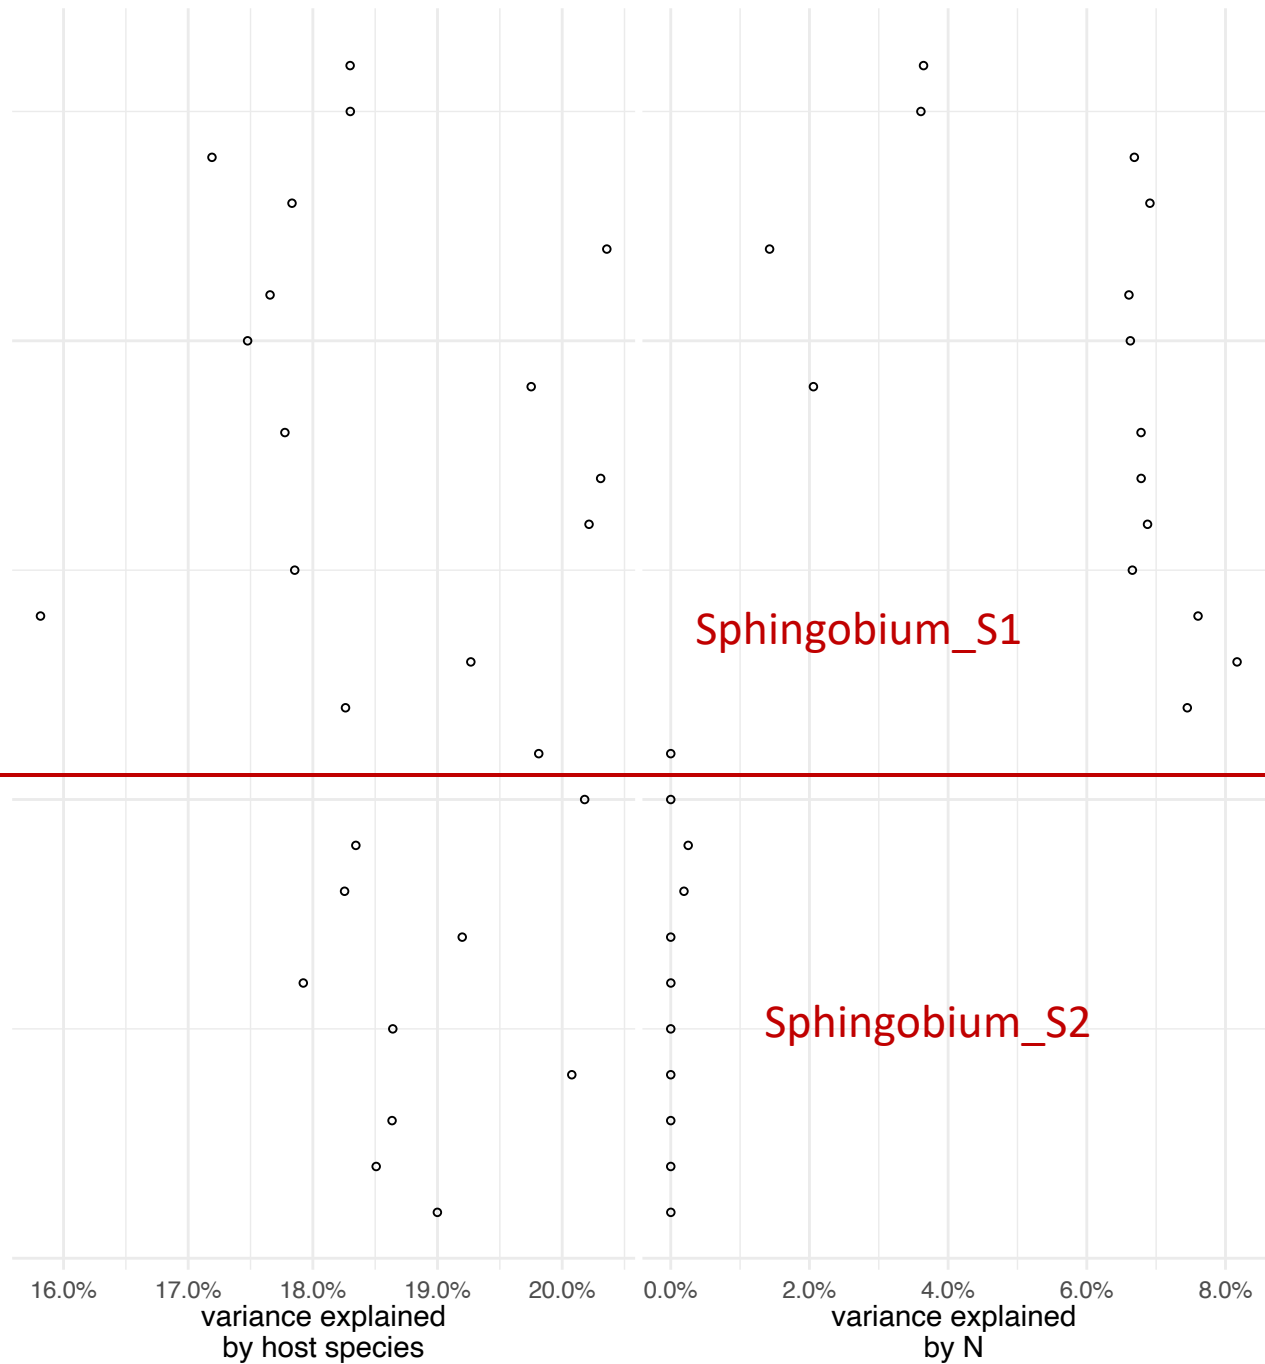

# Sphingomonas

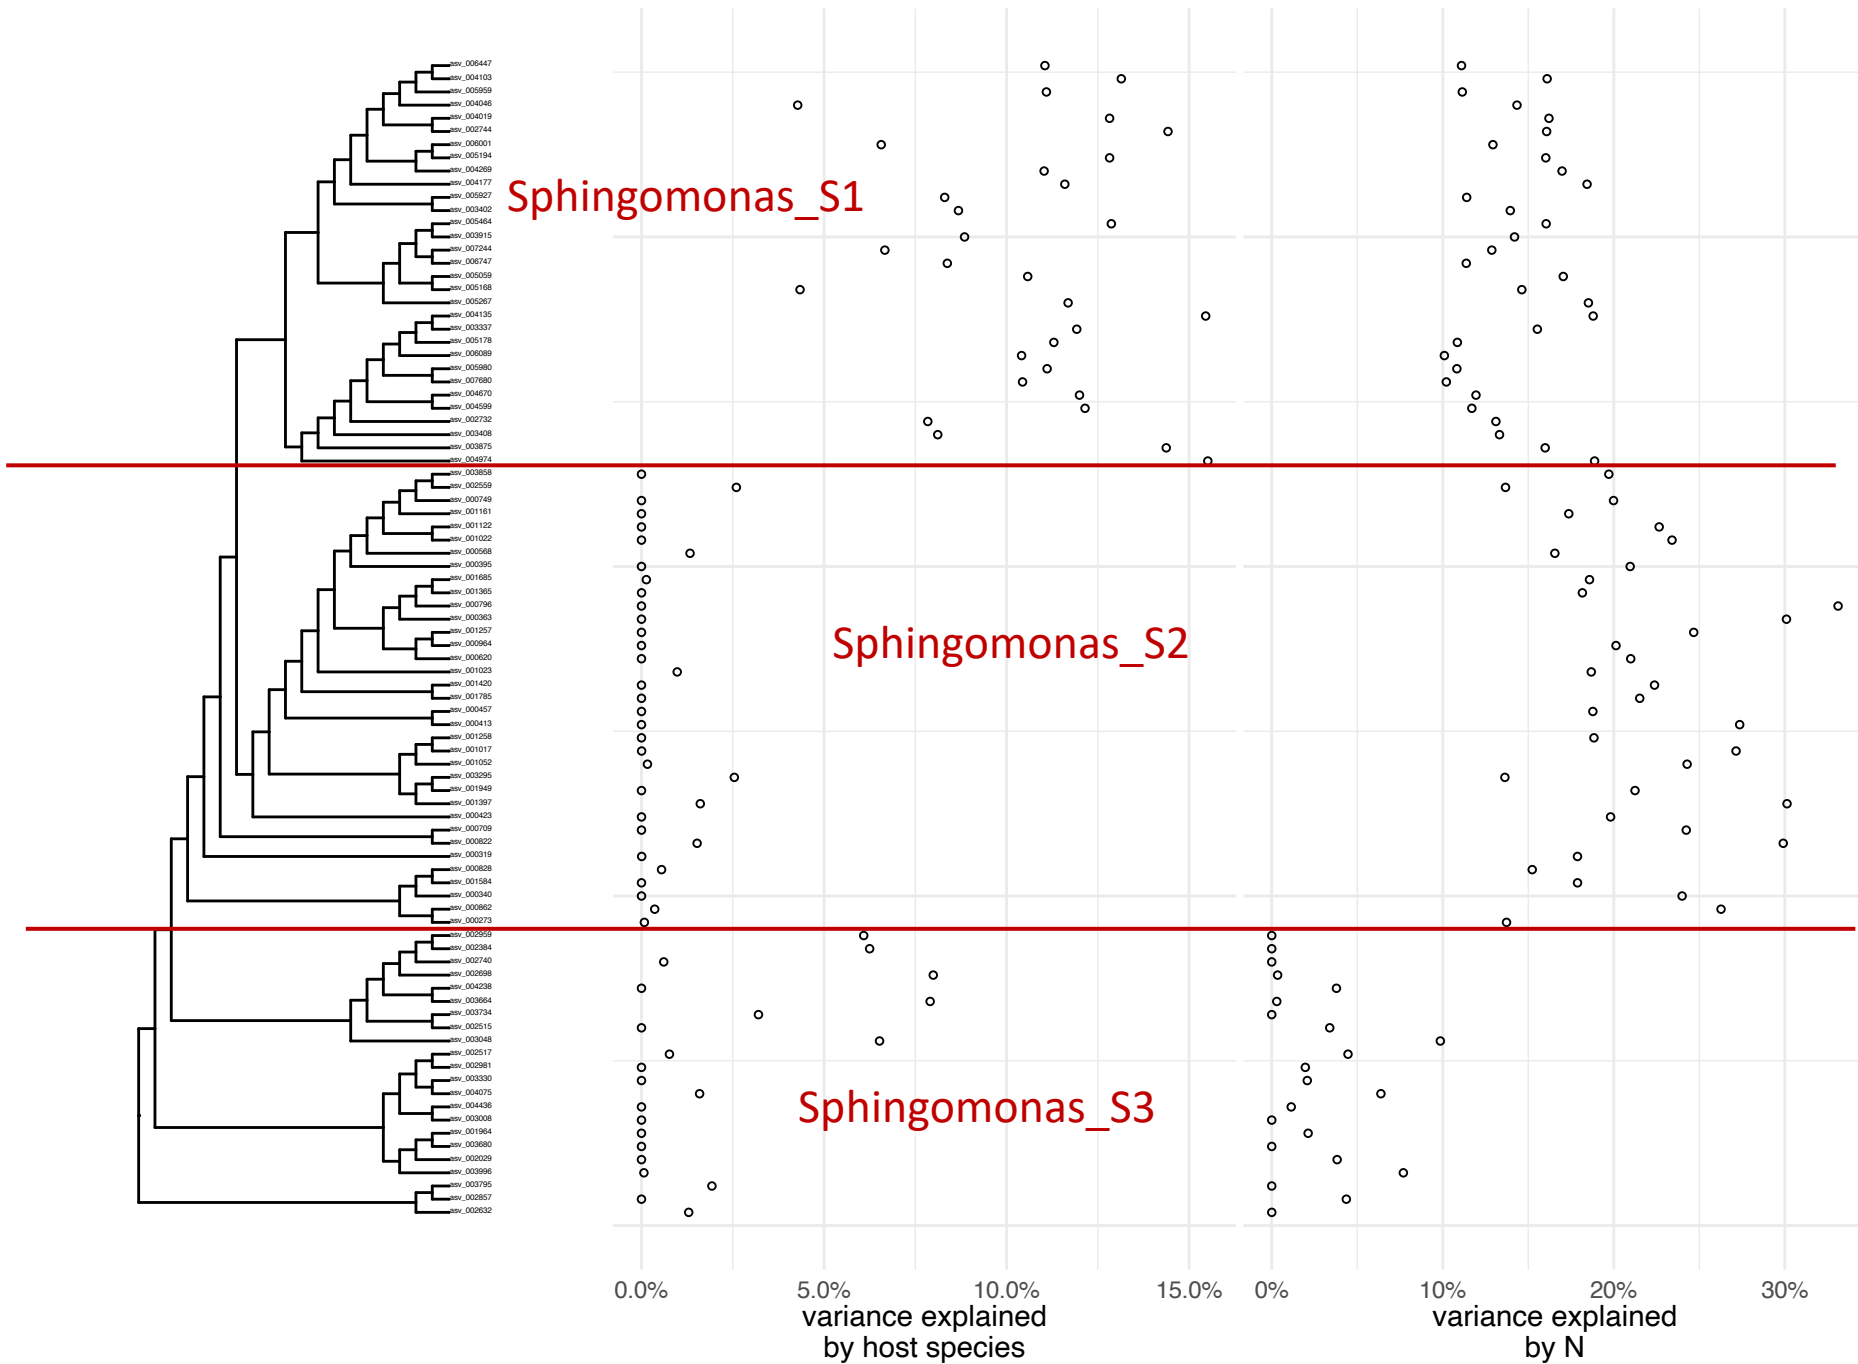

# Streptomyces

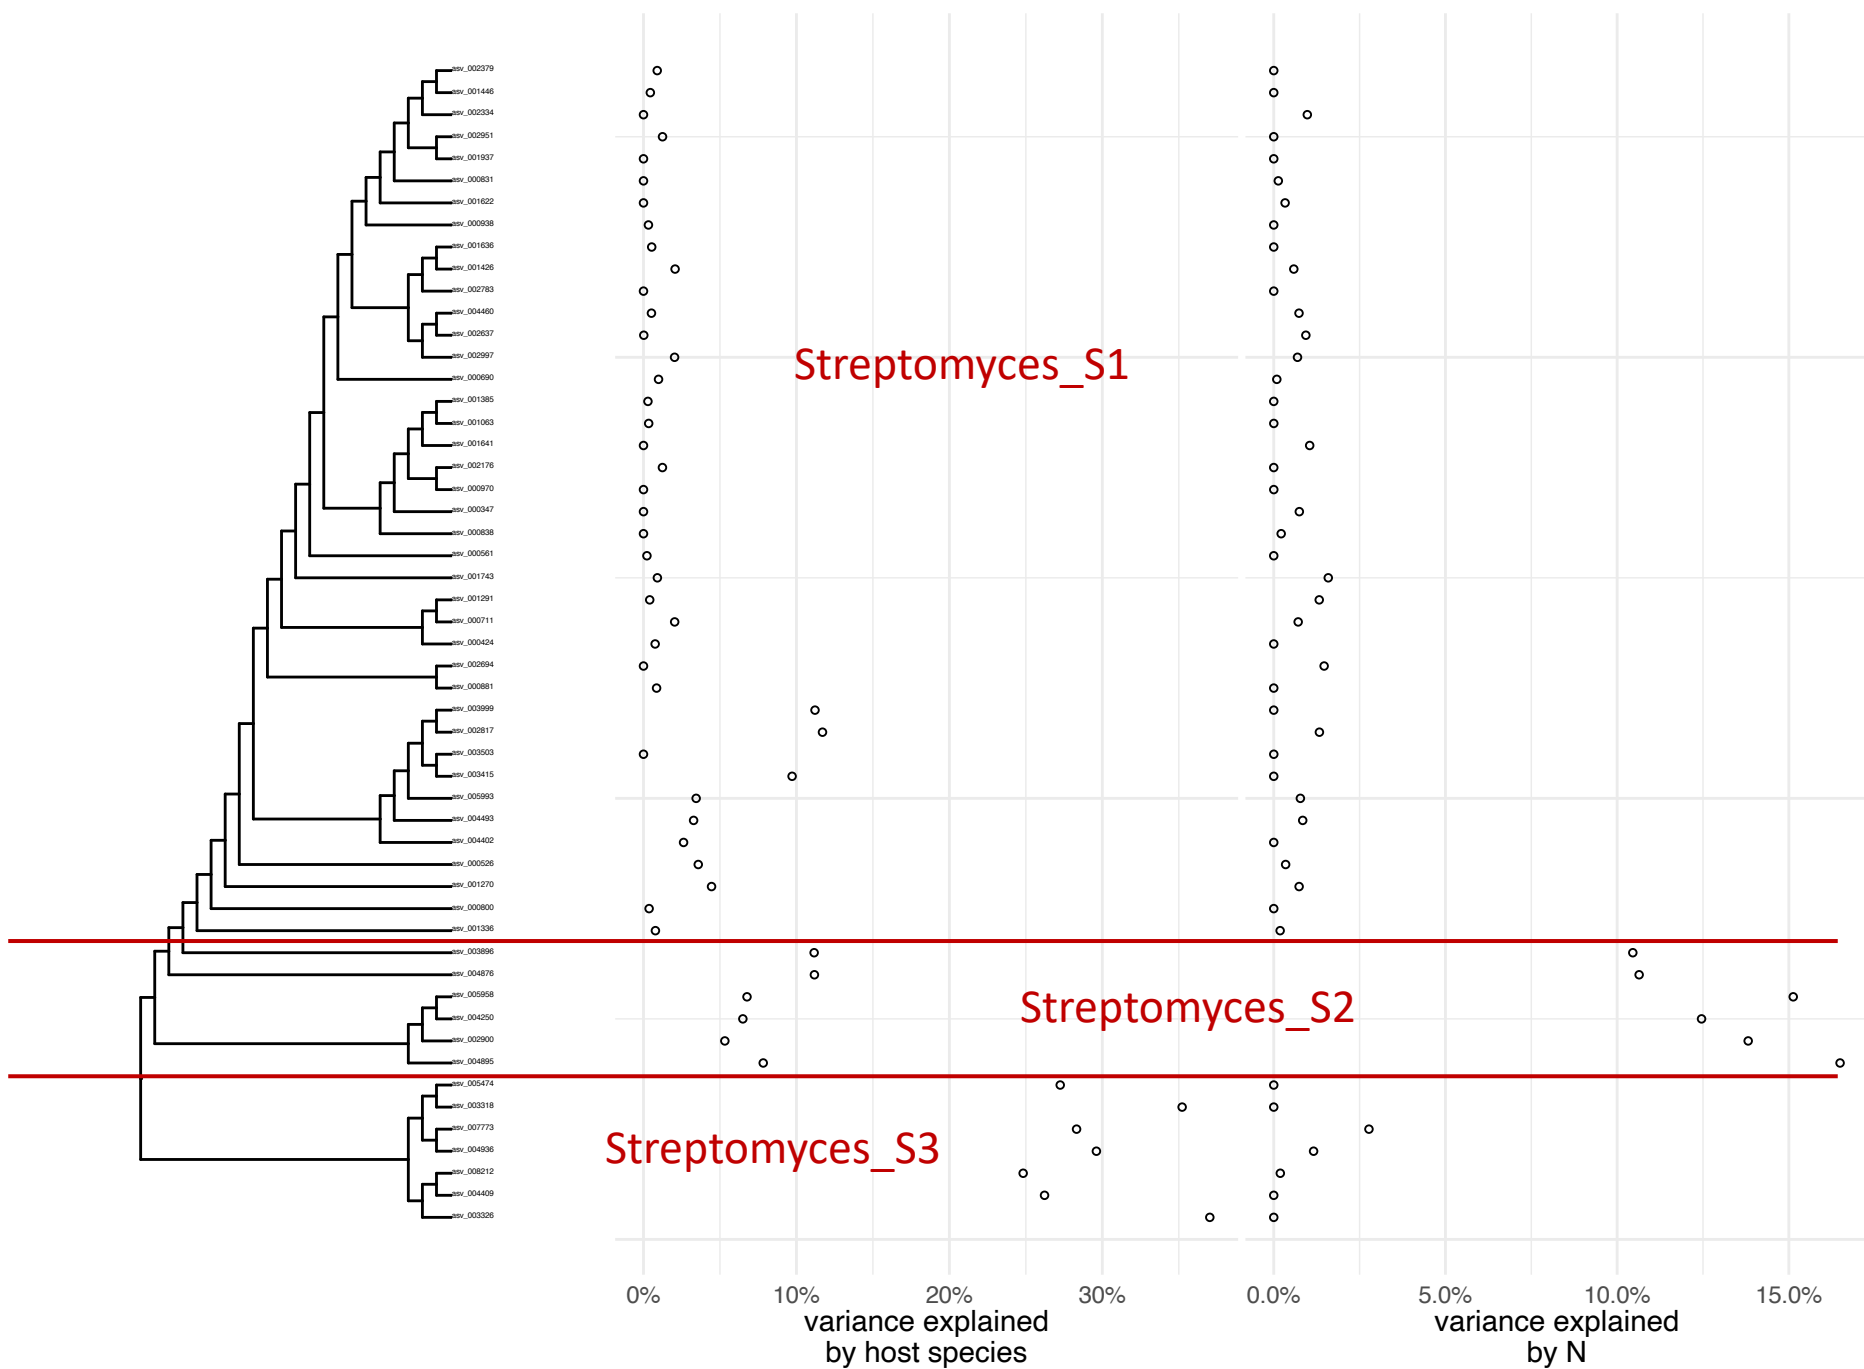

Genera without sub-genus groups

# Allostreptomyces

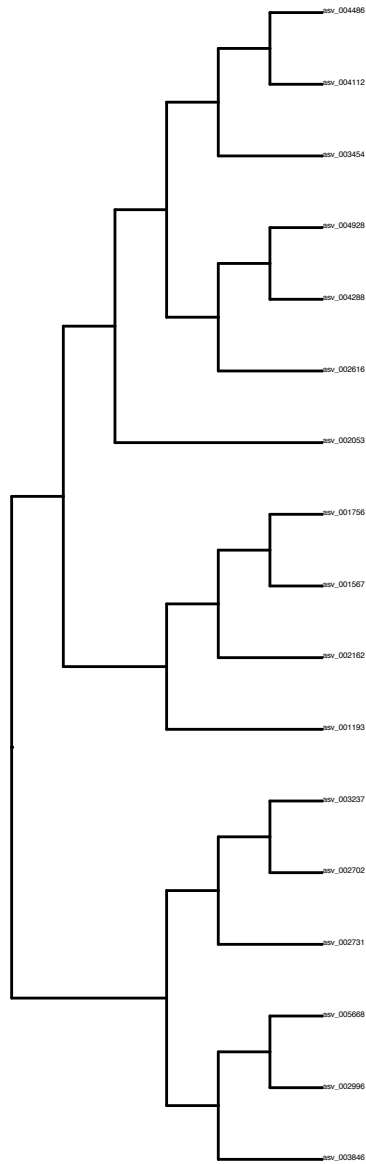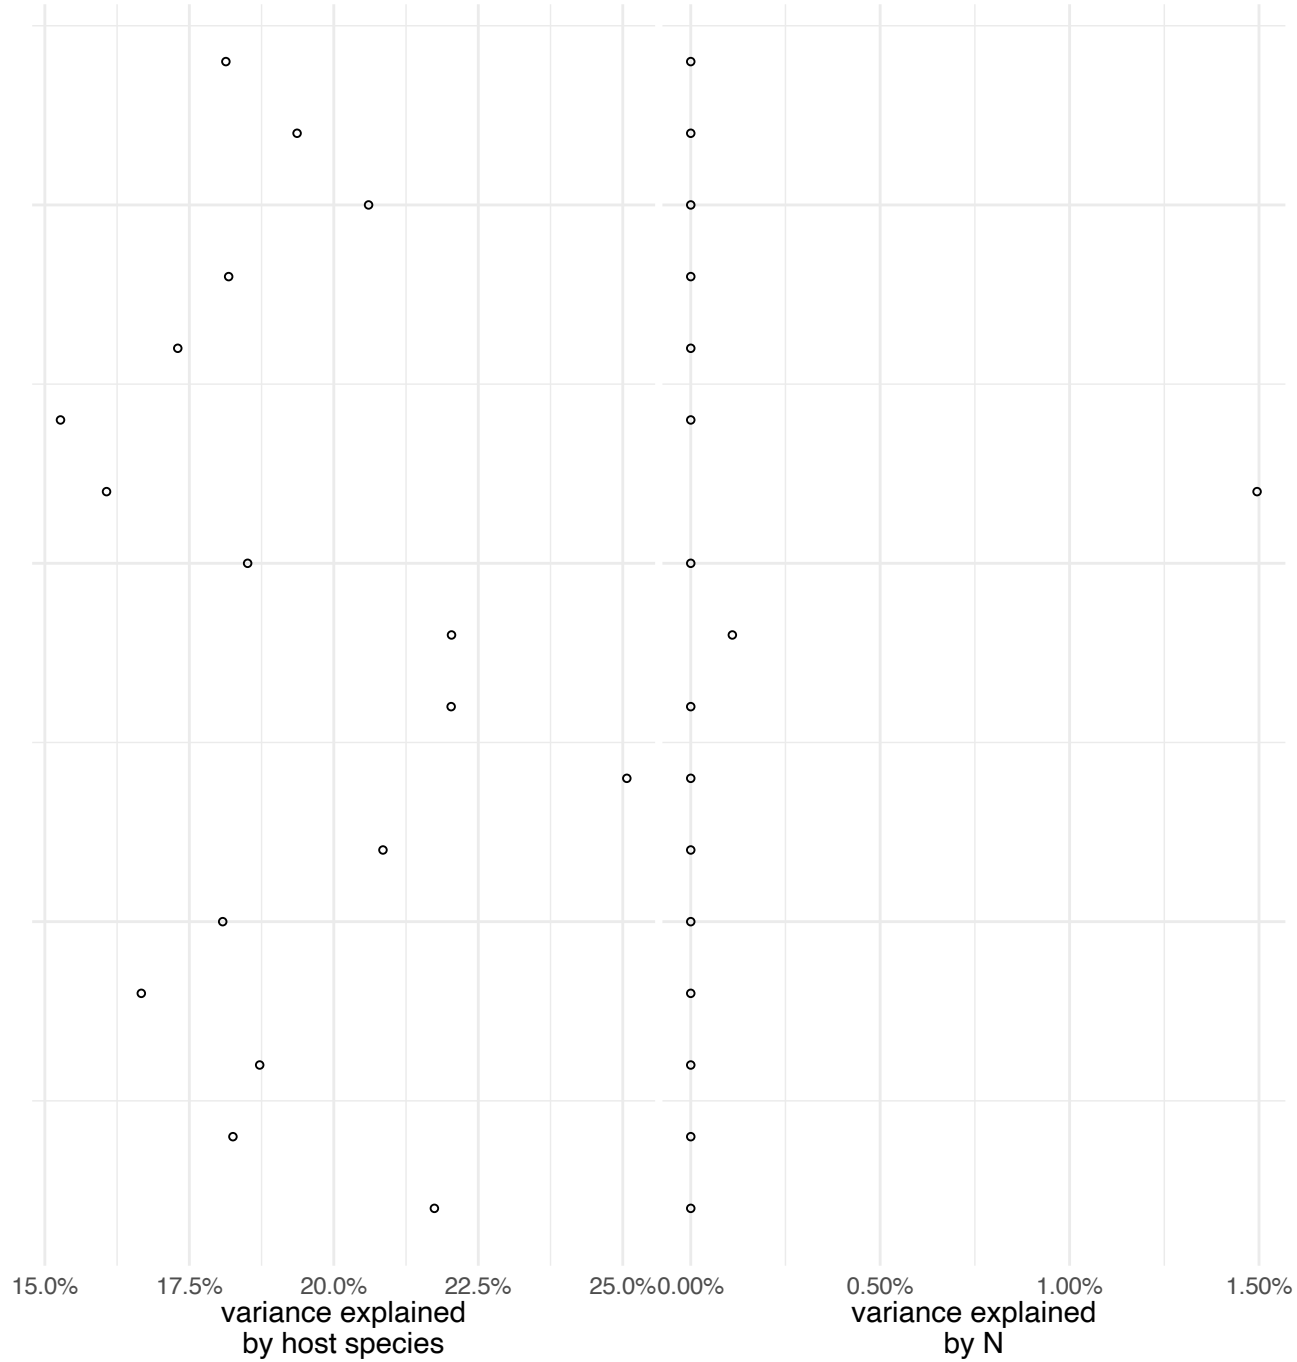



# Aminobacter

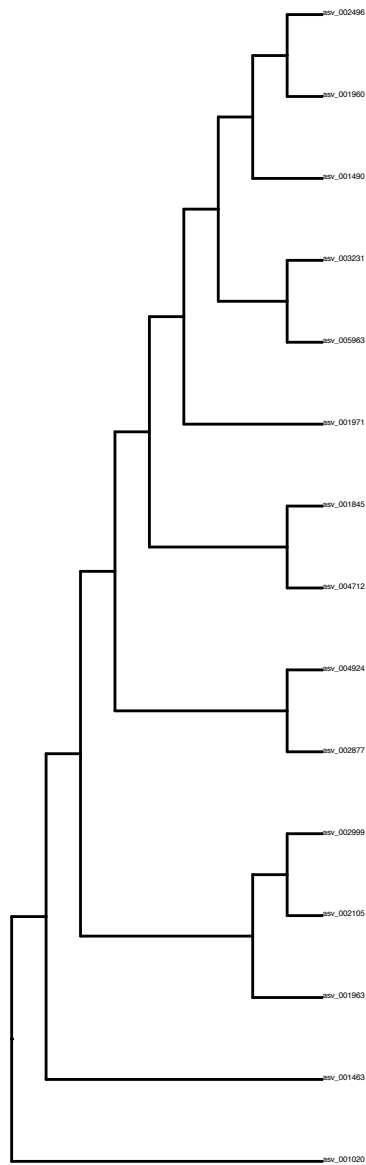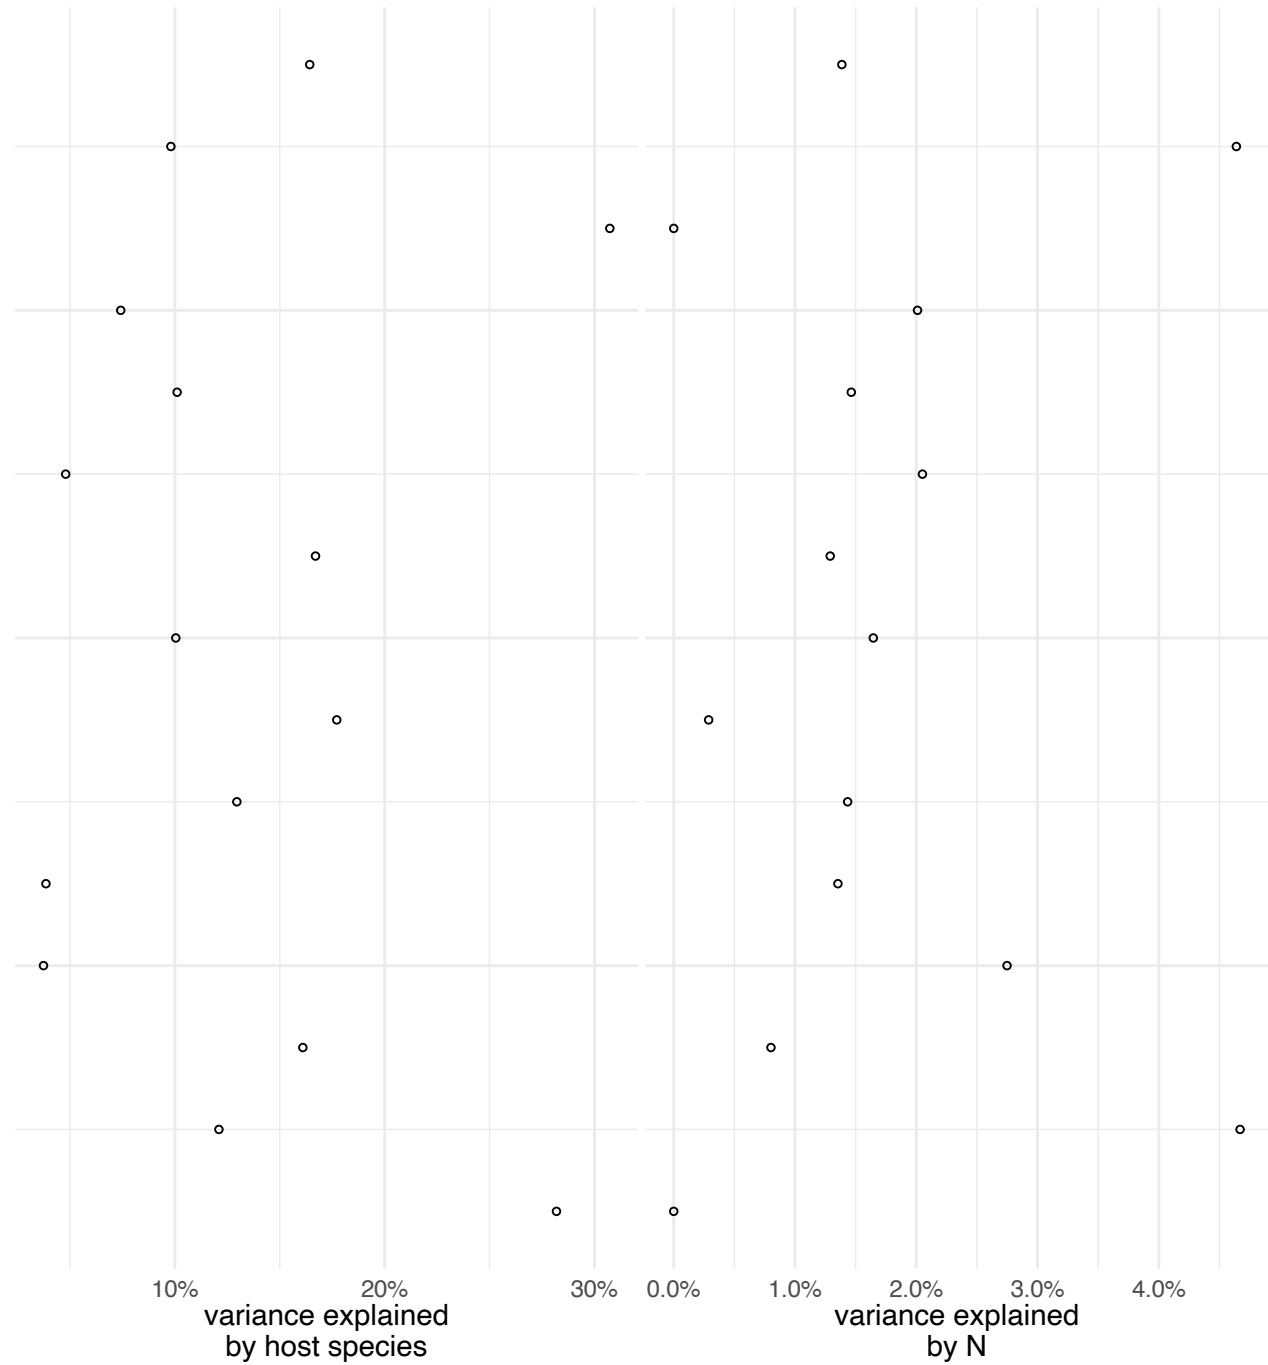

# Archangium

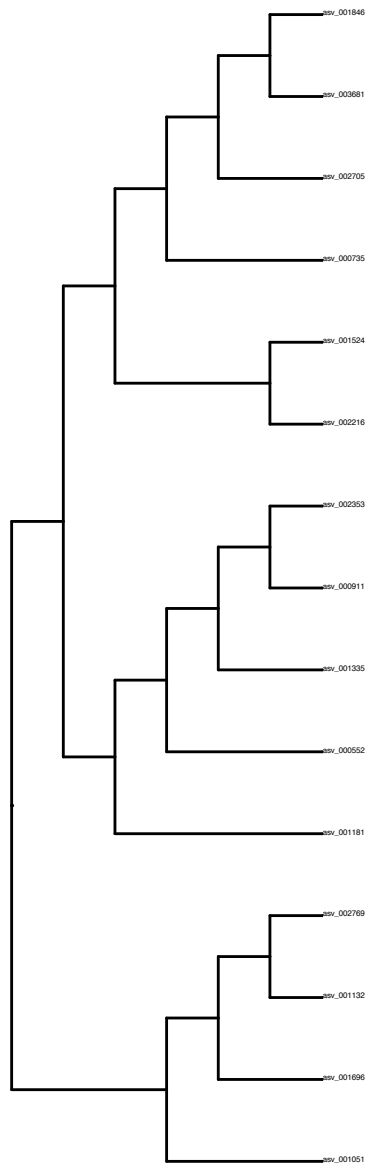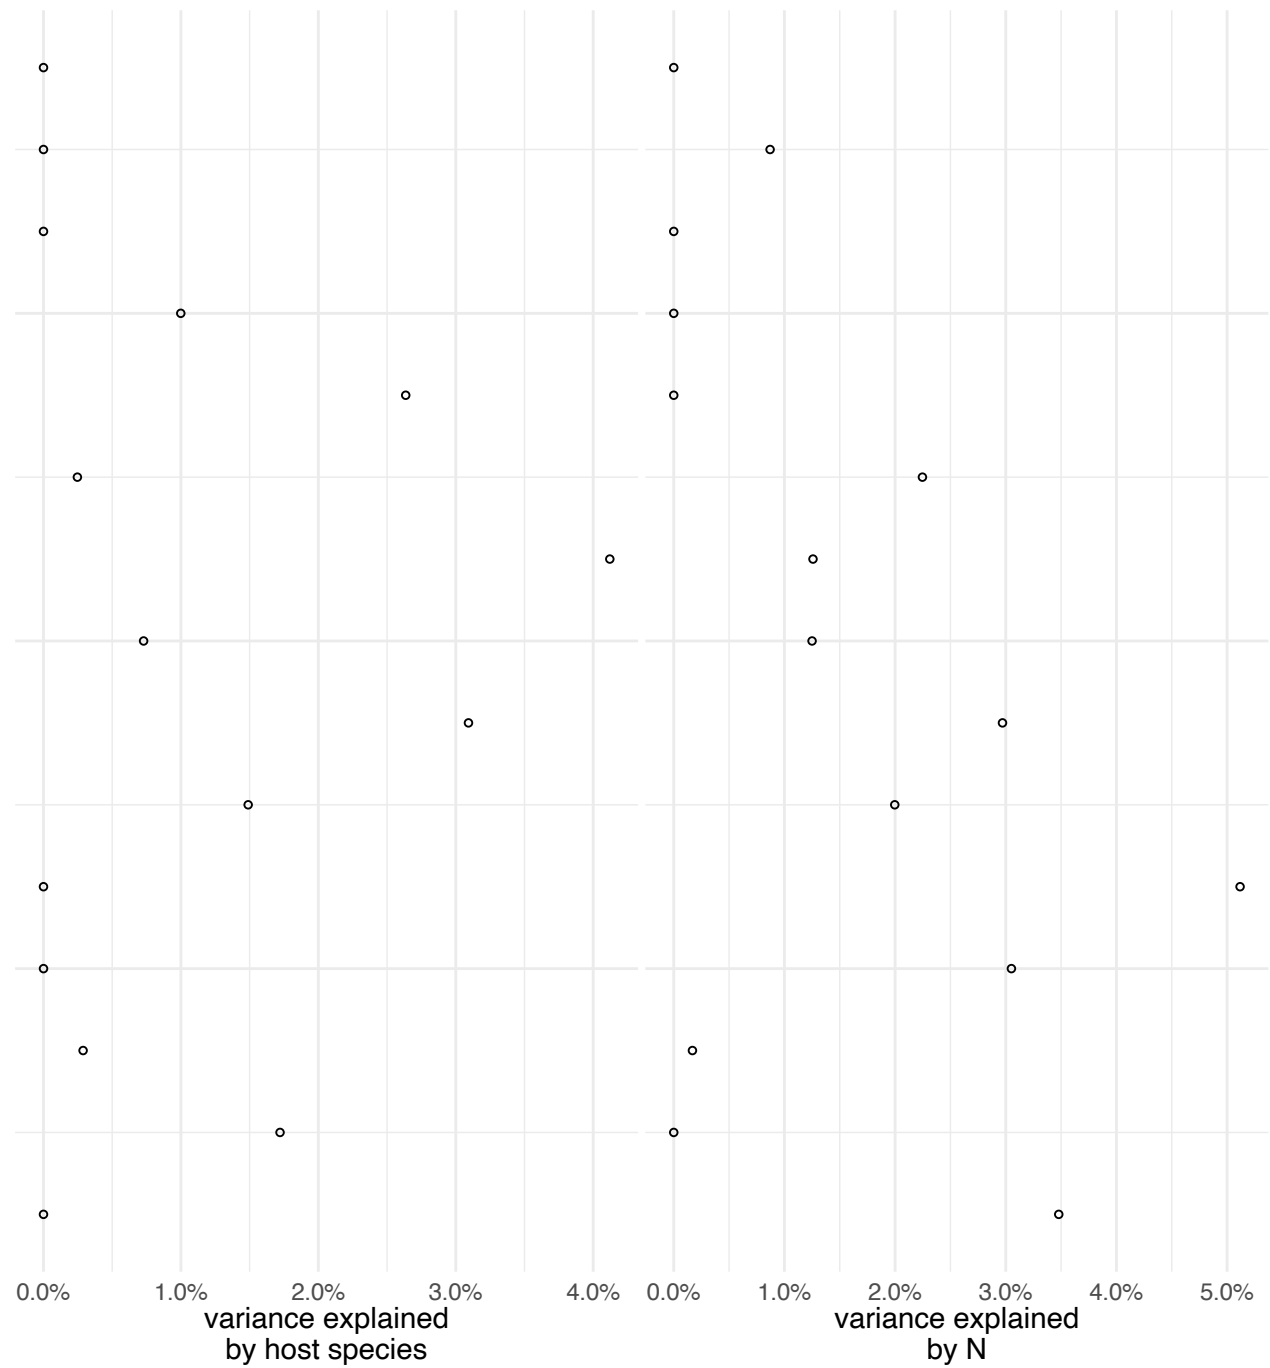

# Arenimonas

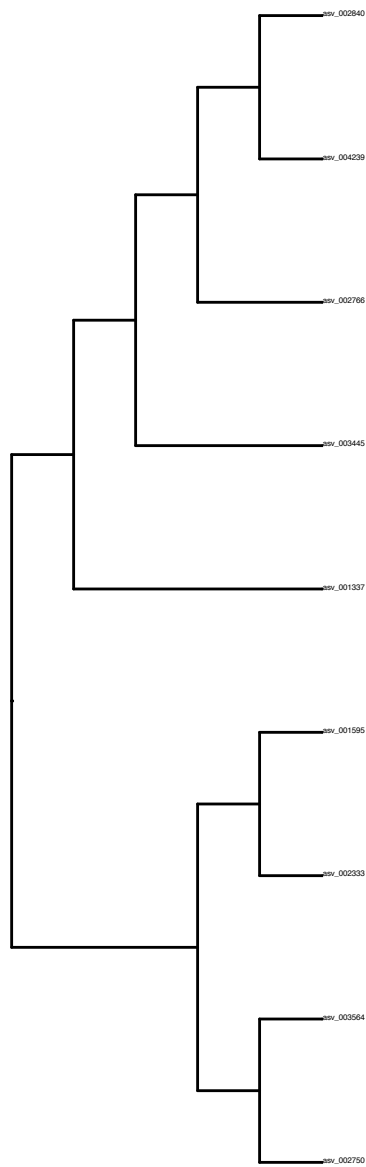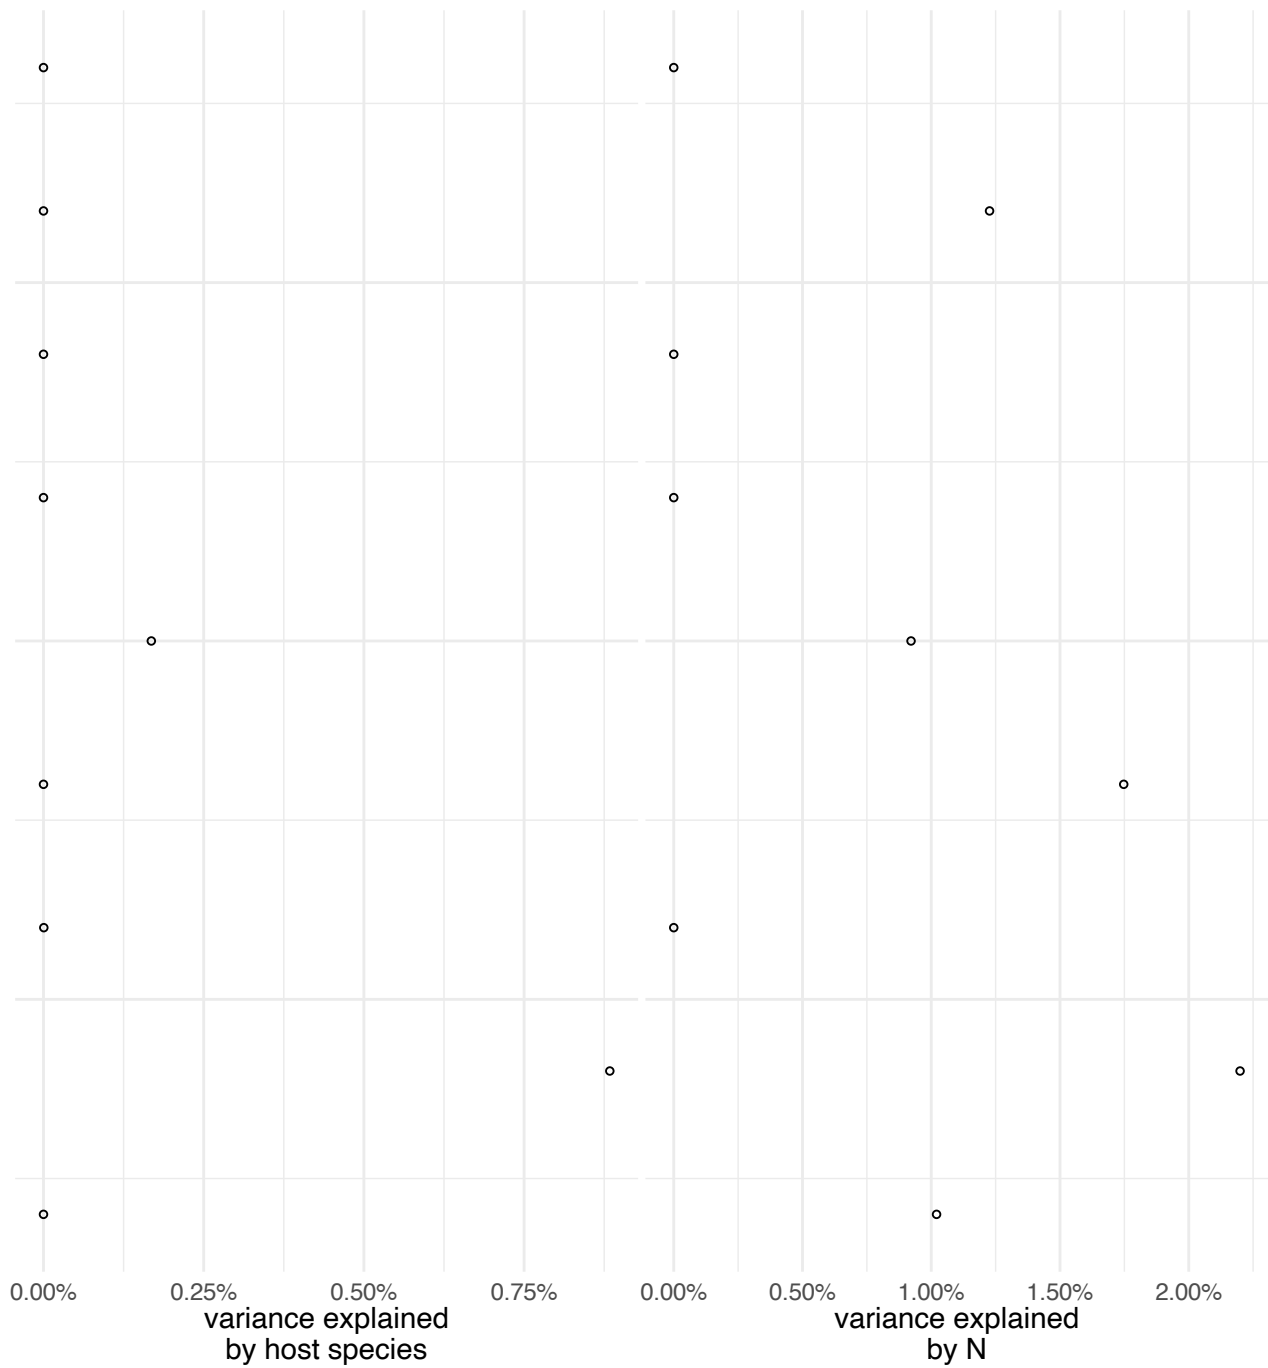

# Bacillus

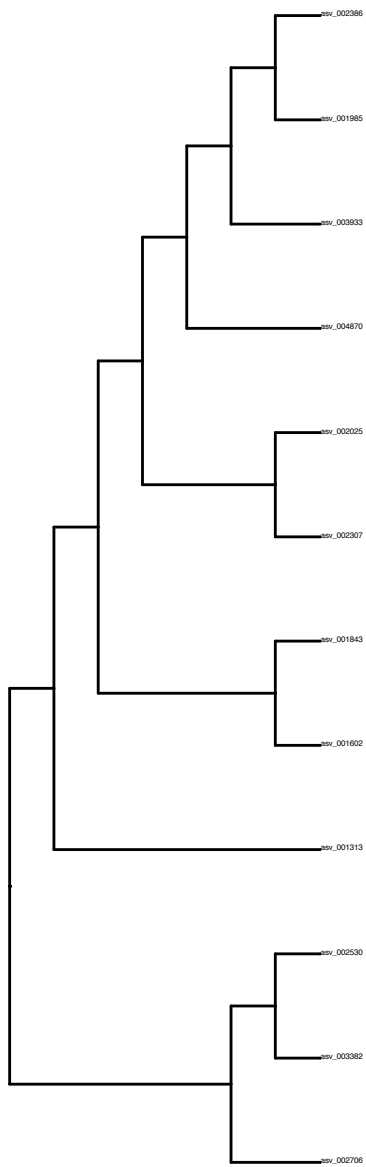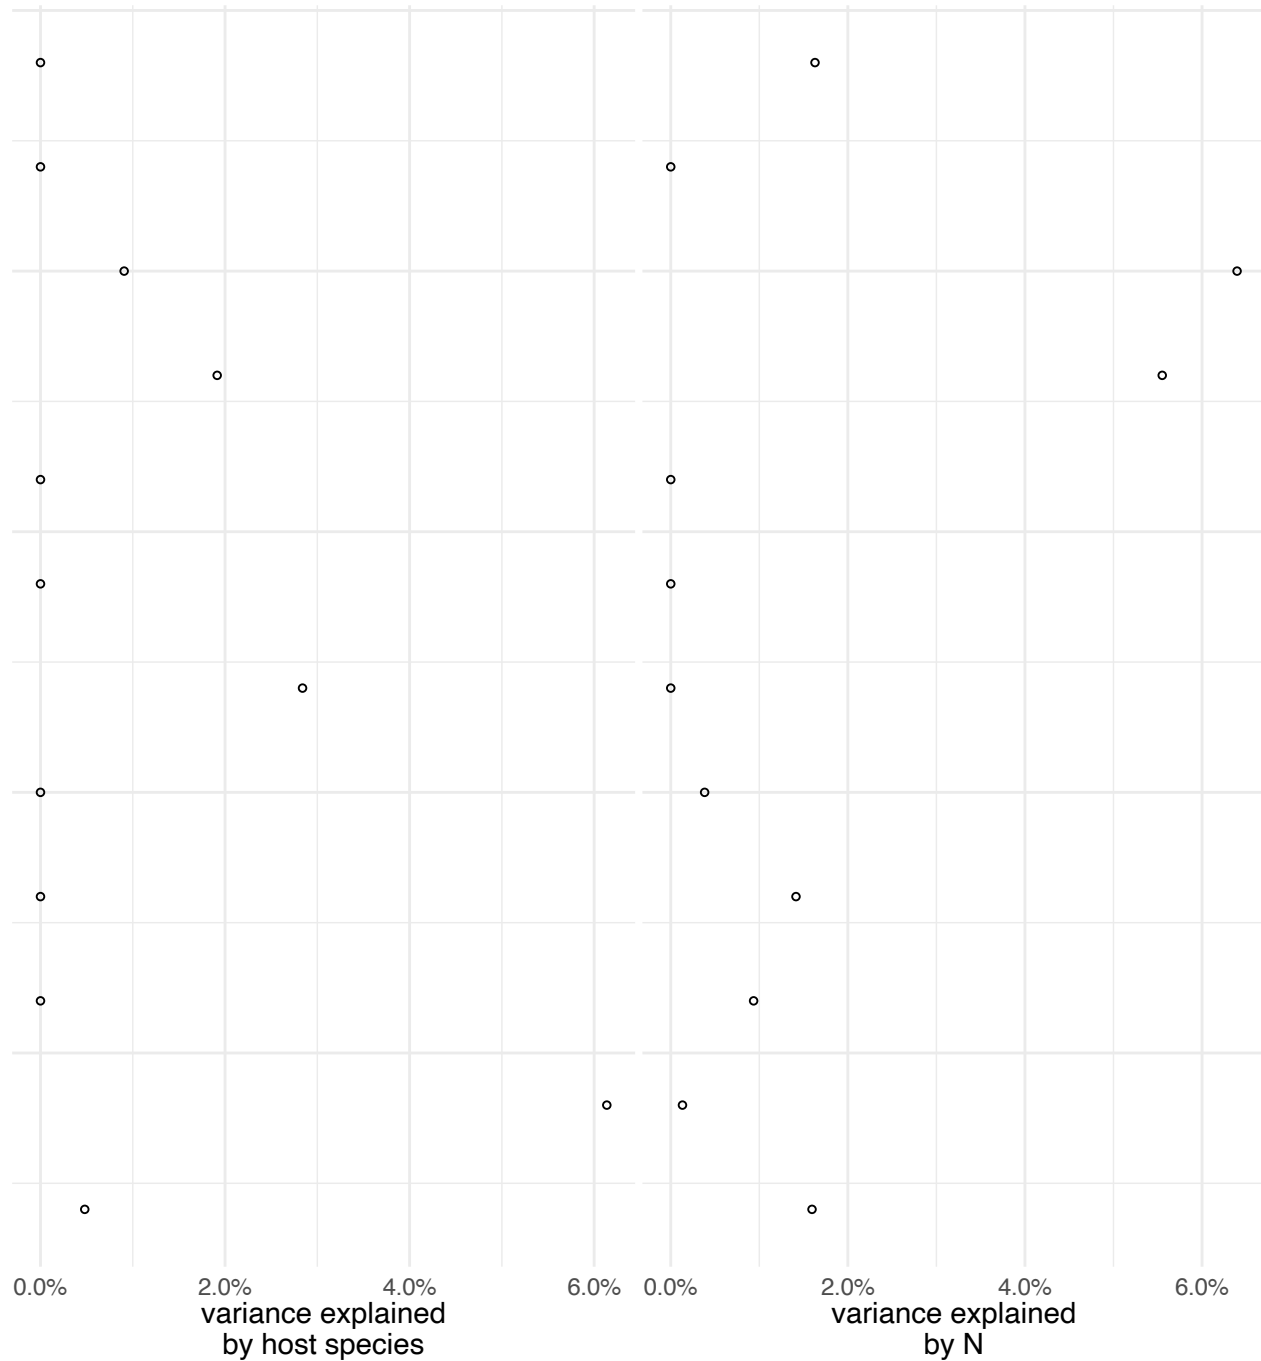

# Blastococcus

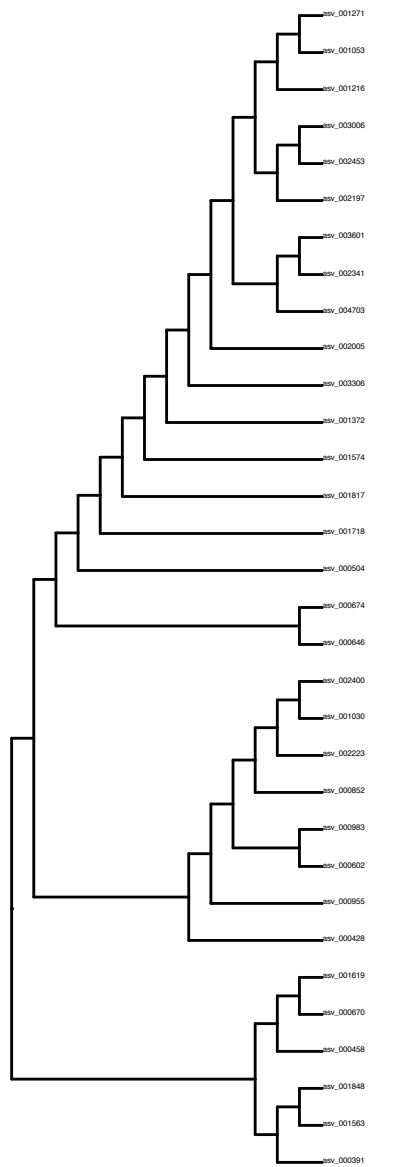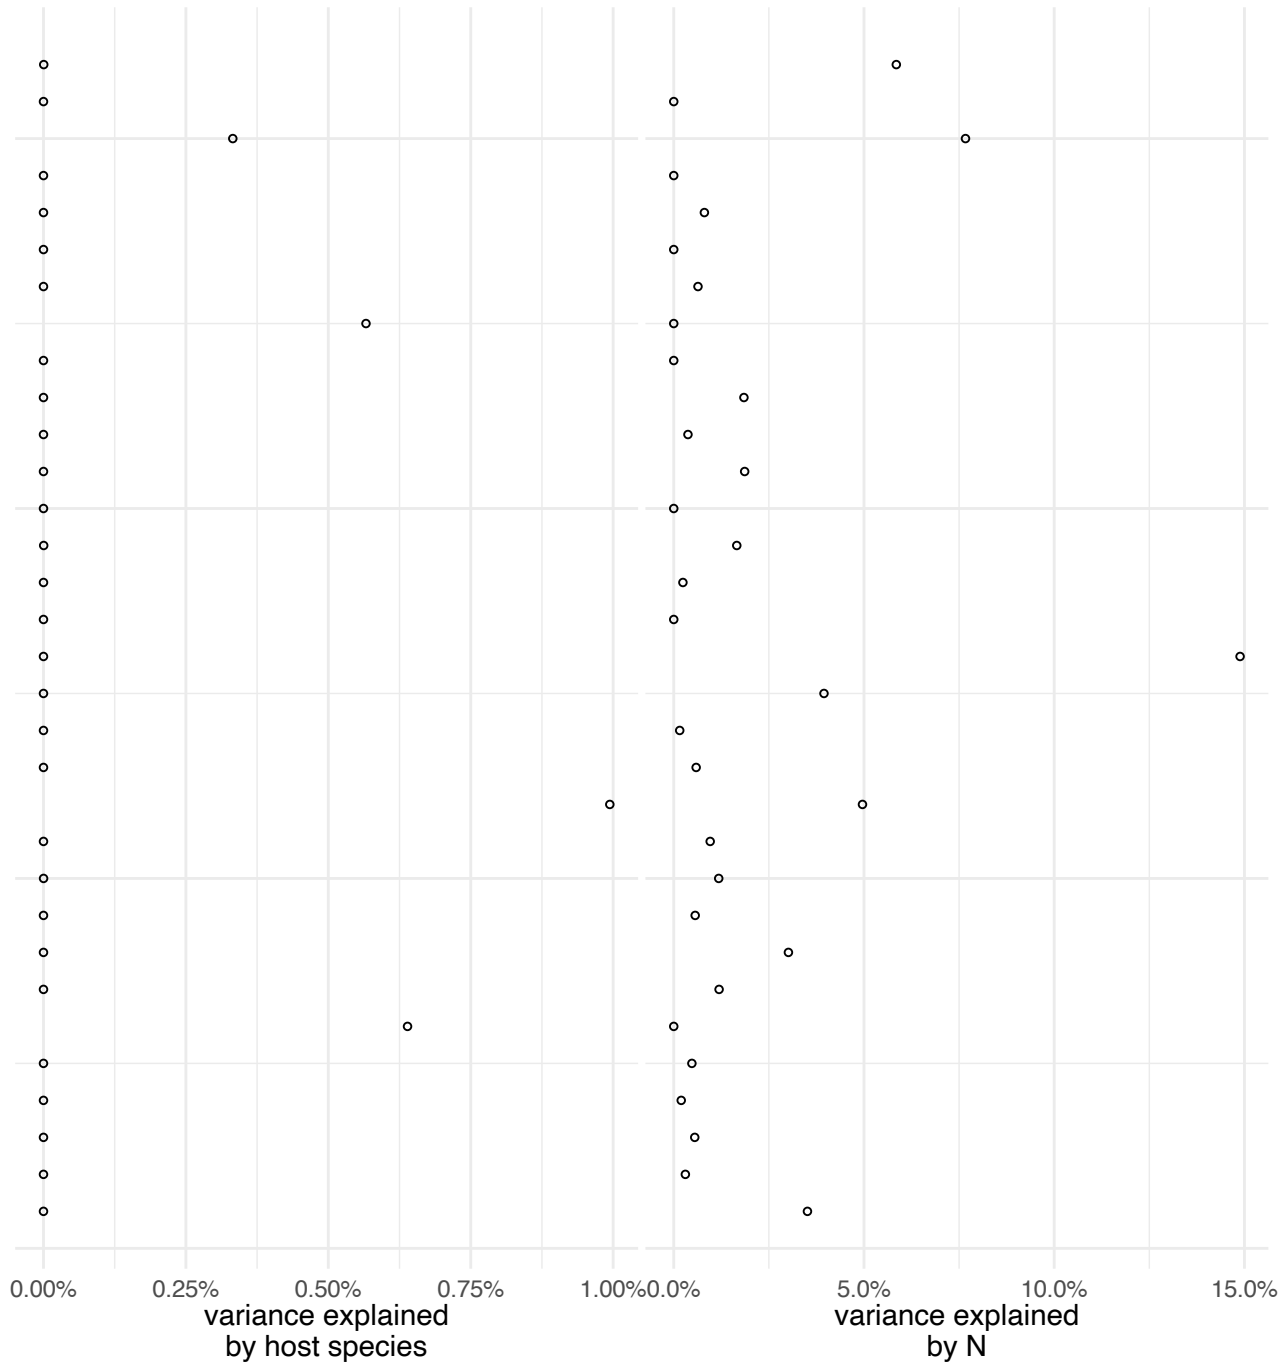

# Bradyrhizobium

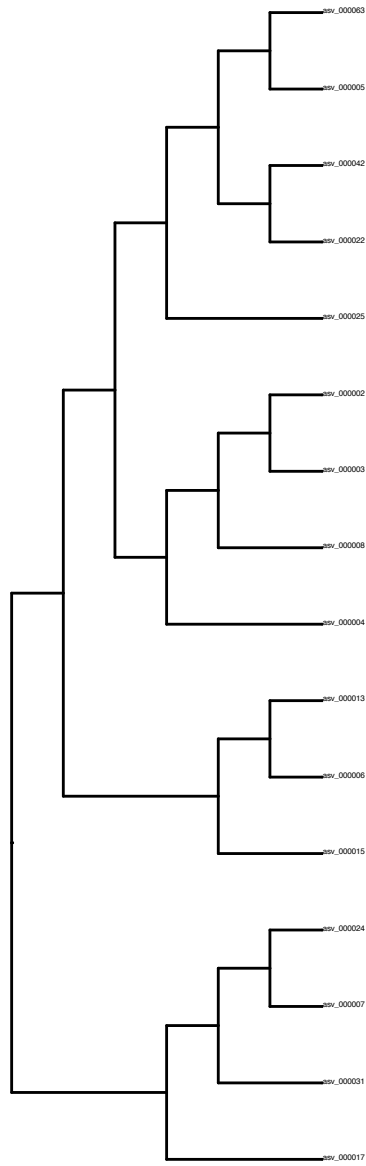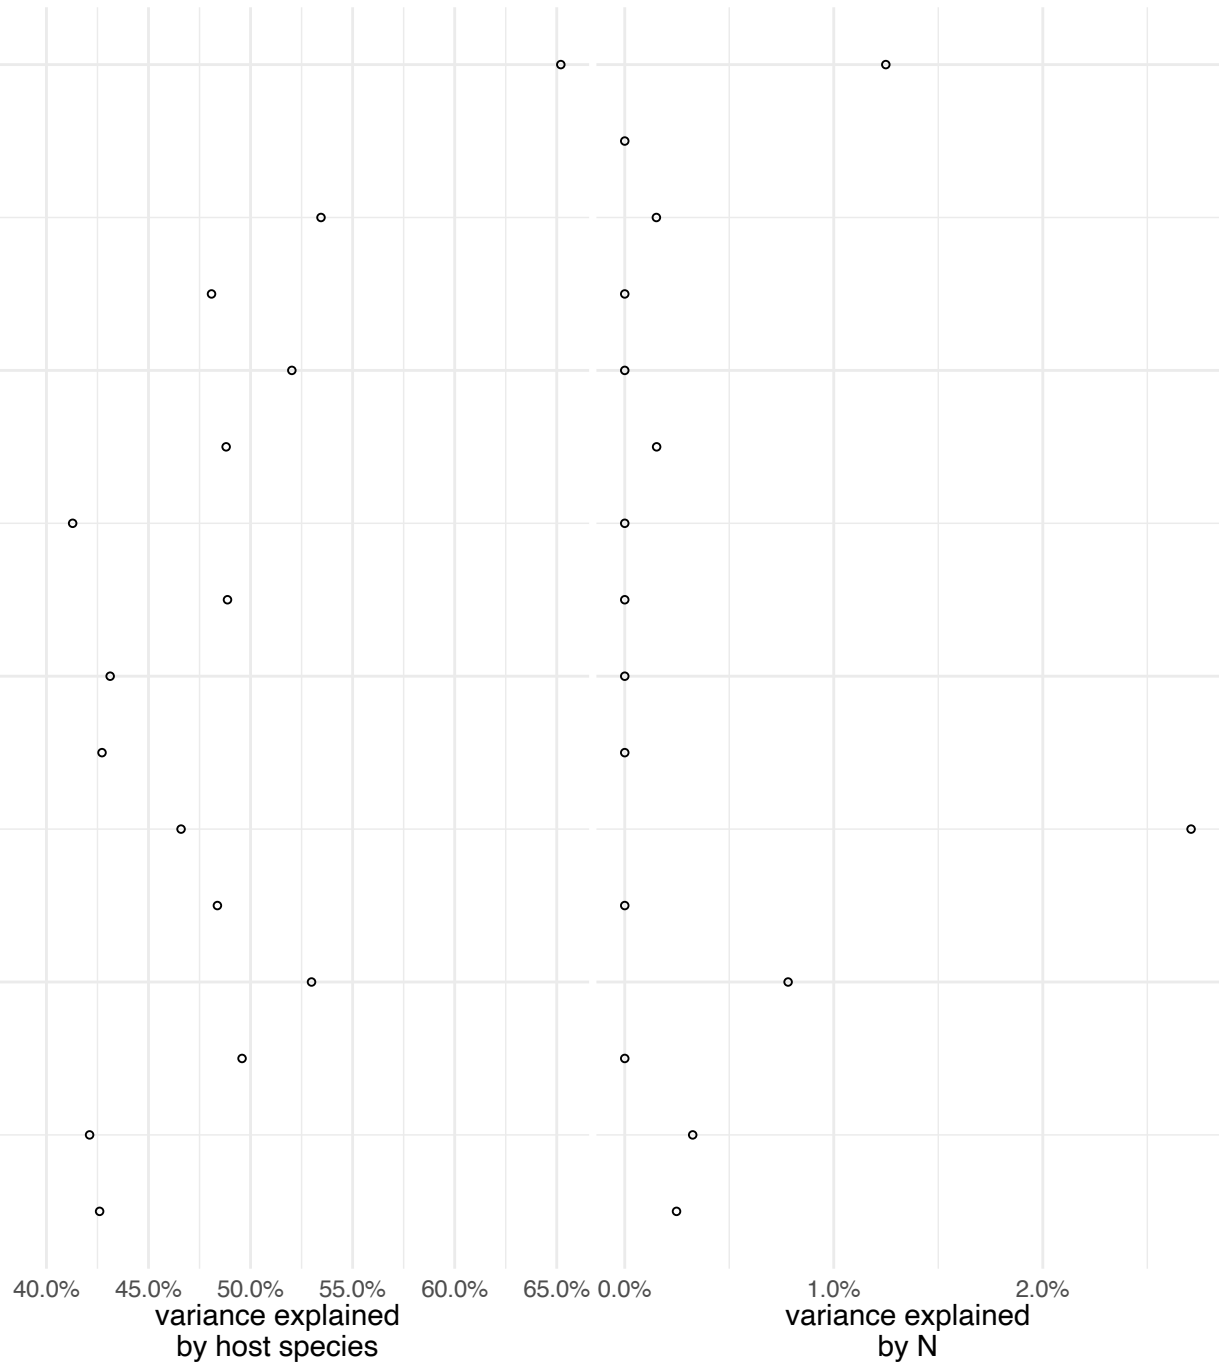

# Candidatus\_Nitrocosmicus

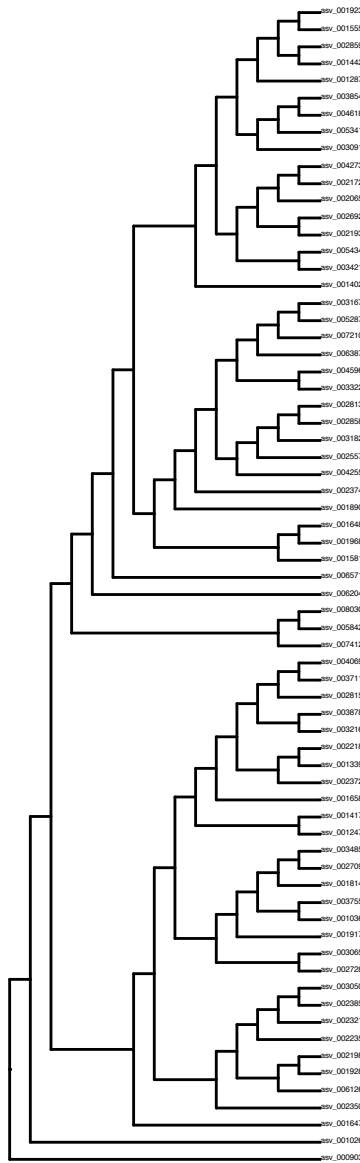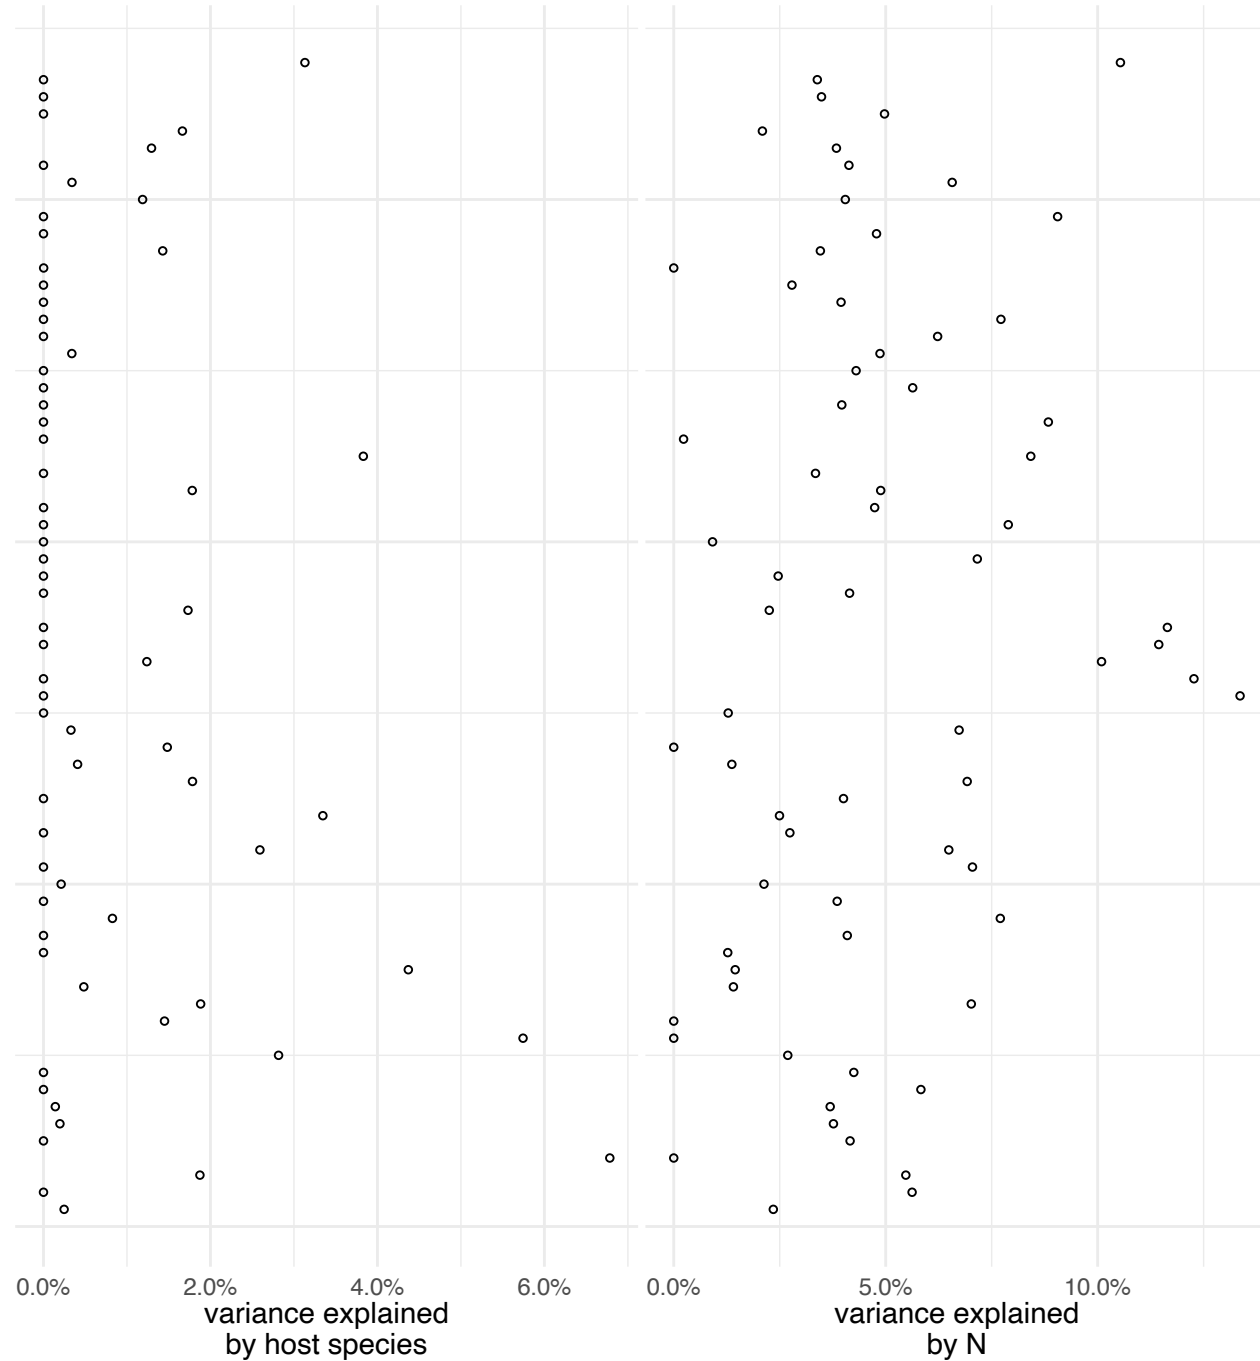

# Candidatus\_Udaeobacter

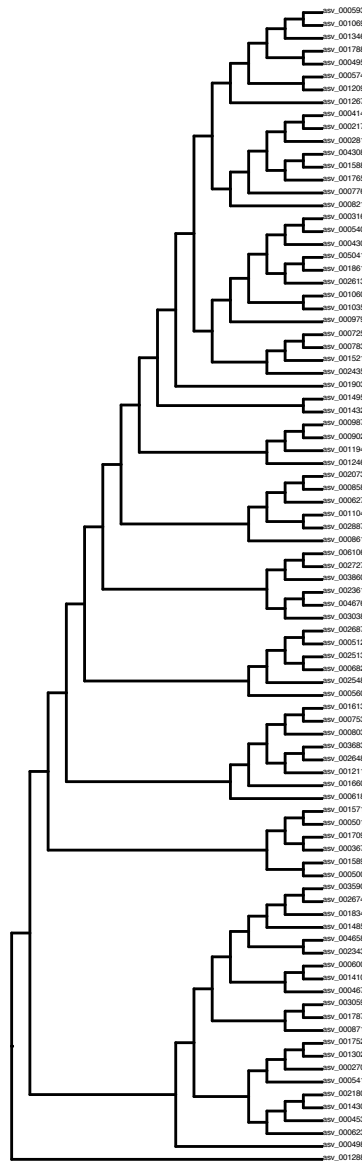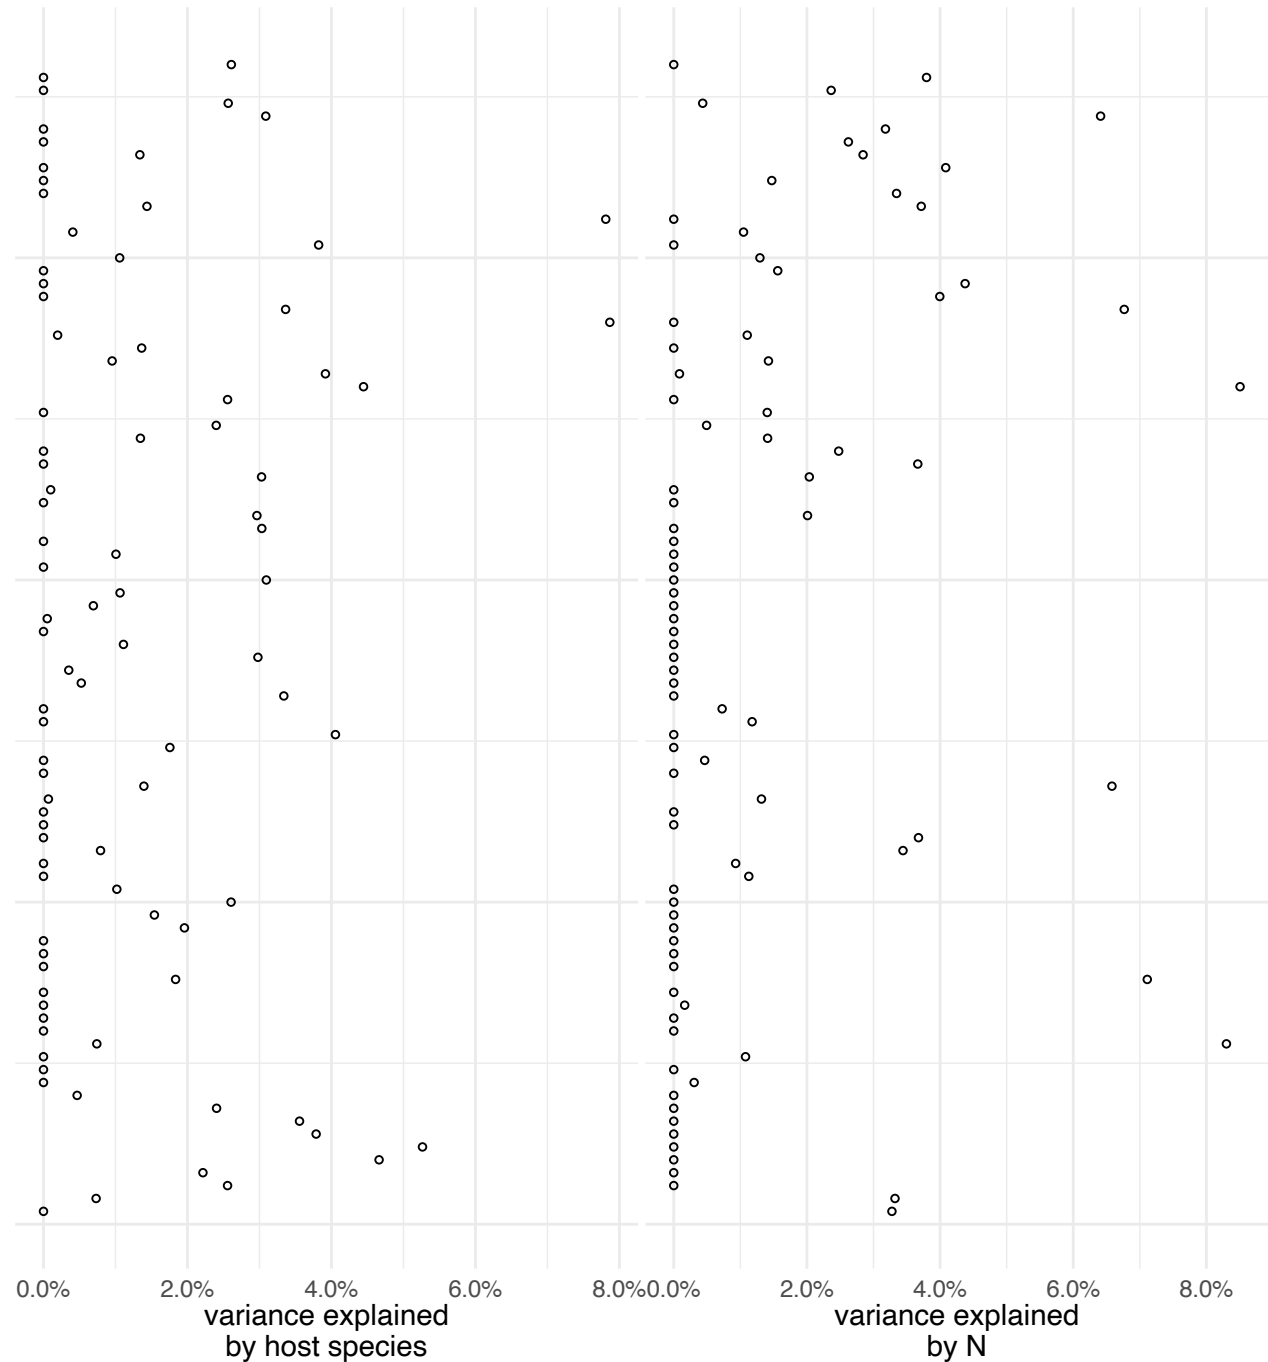



# Caulobacter

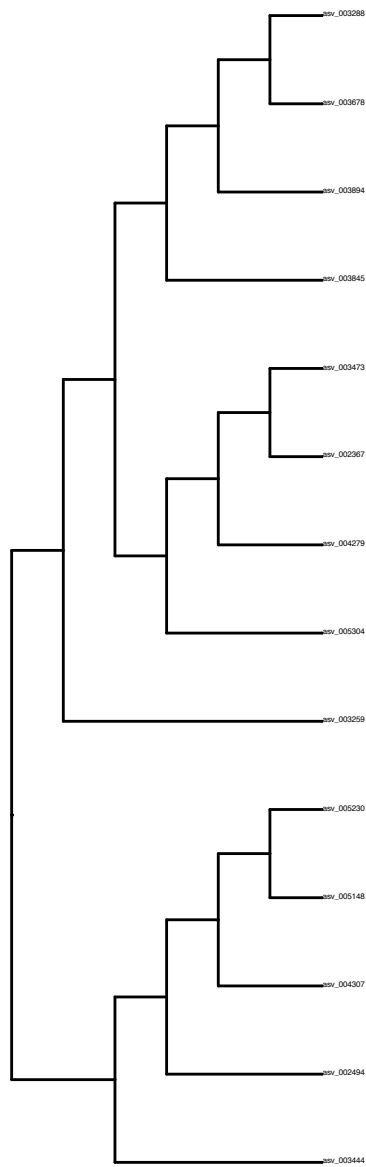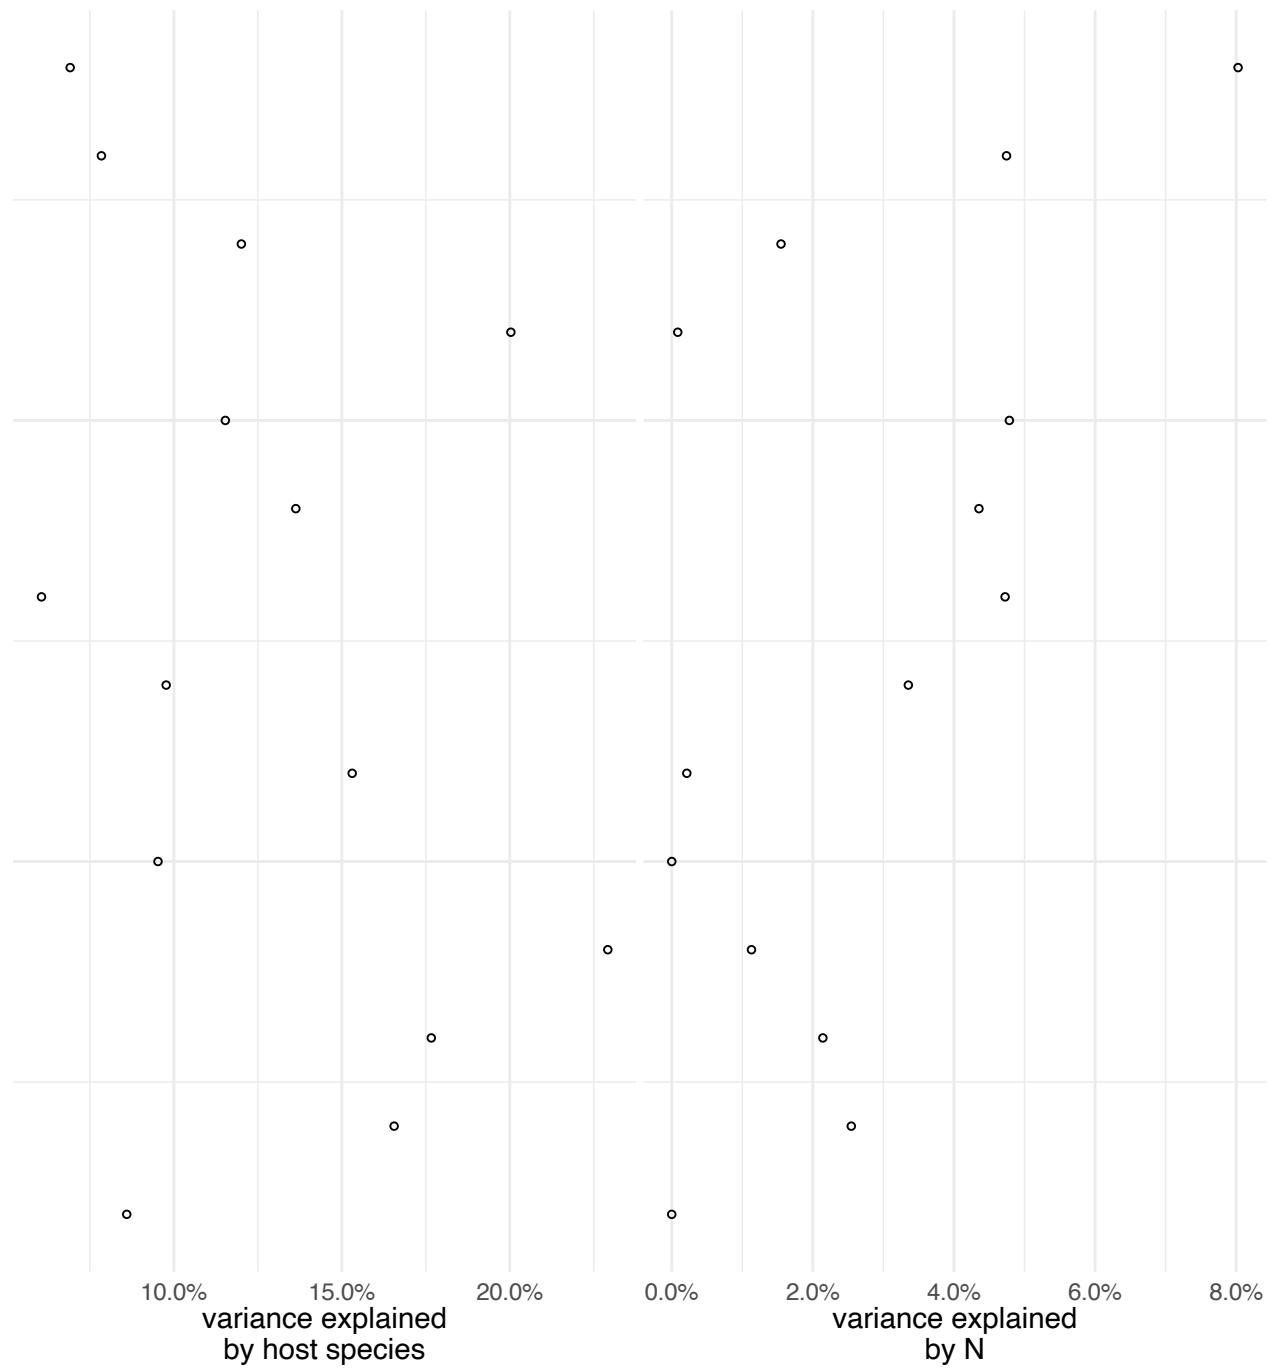

# Chungangia

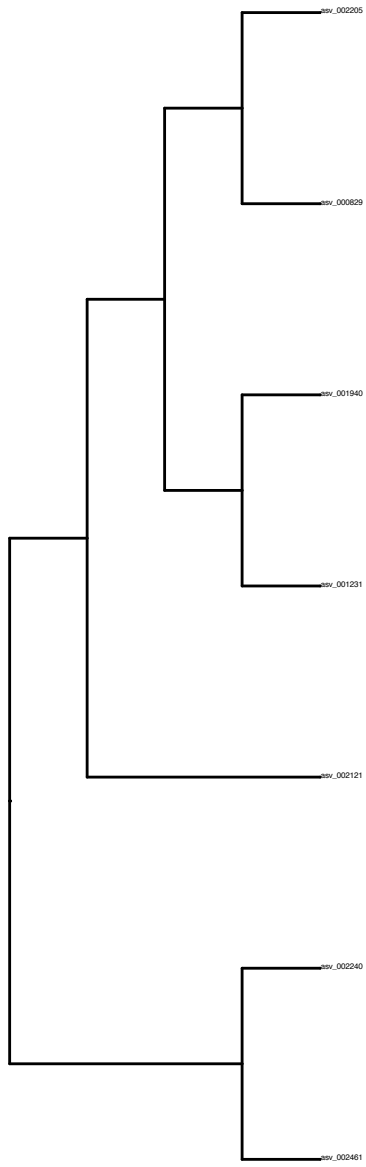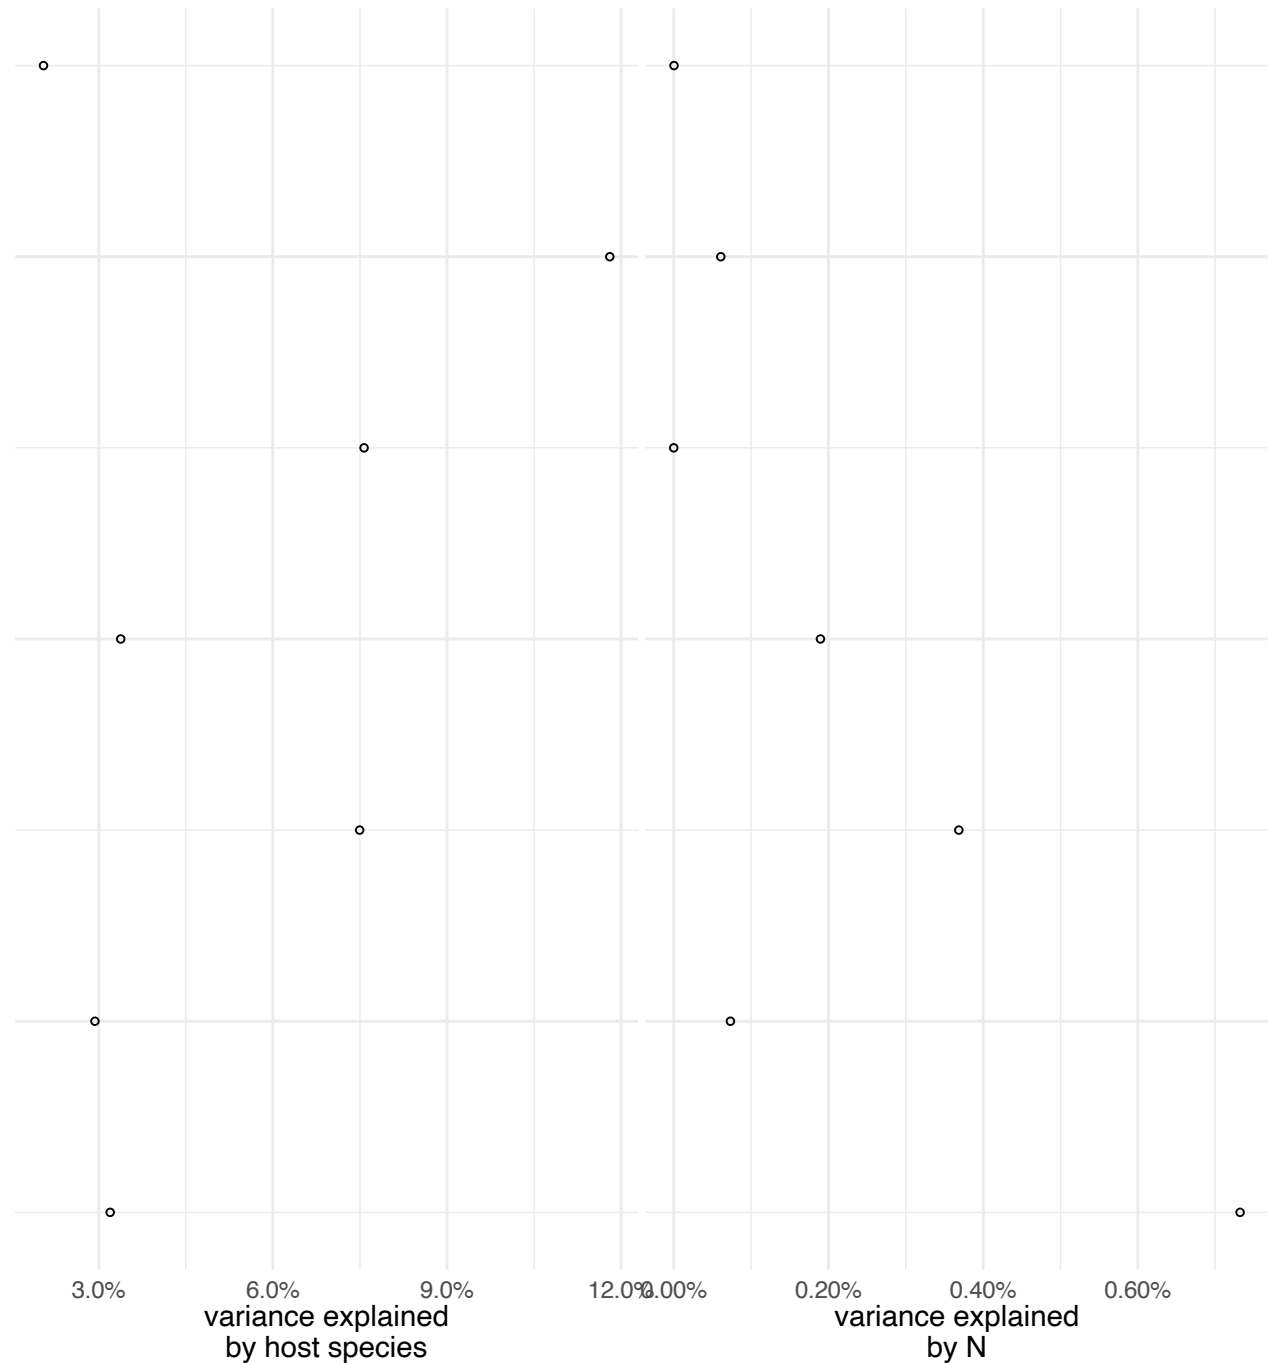

# Conexibacter

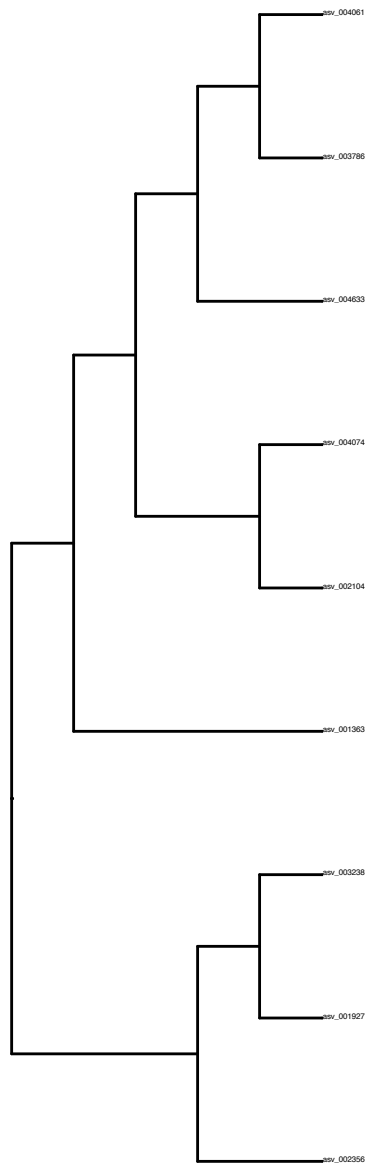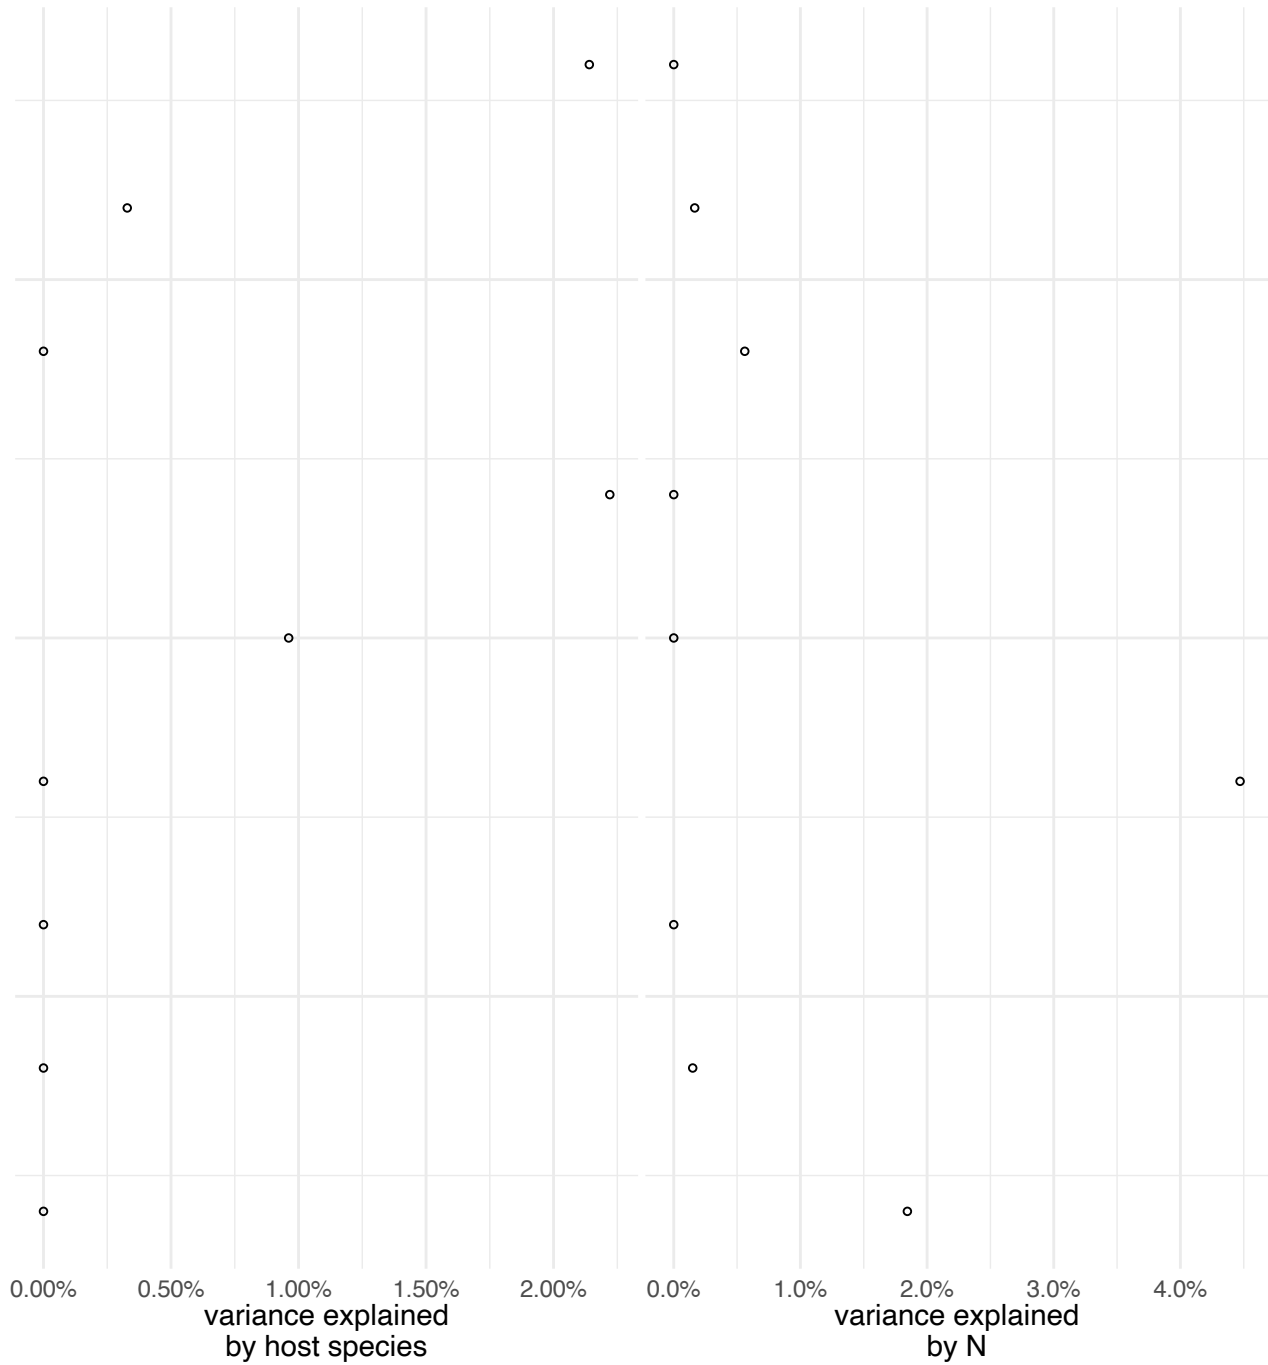



# Dongia

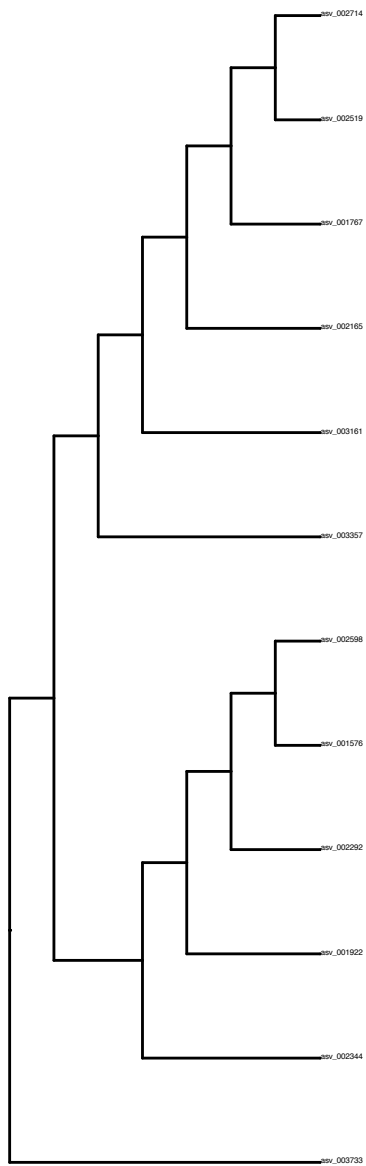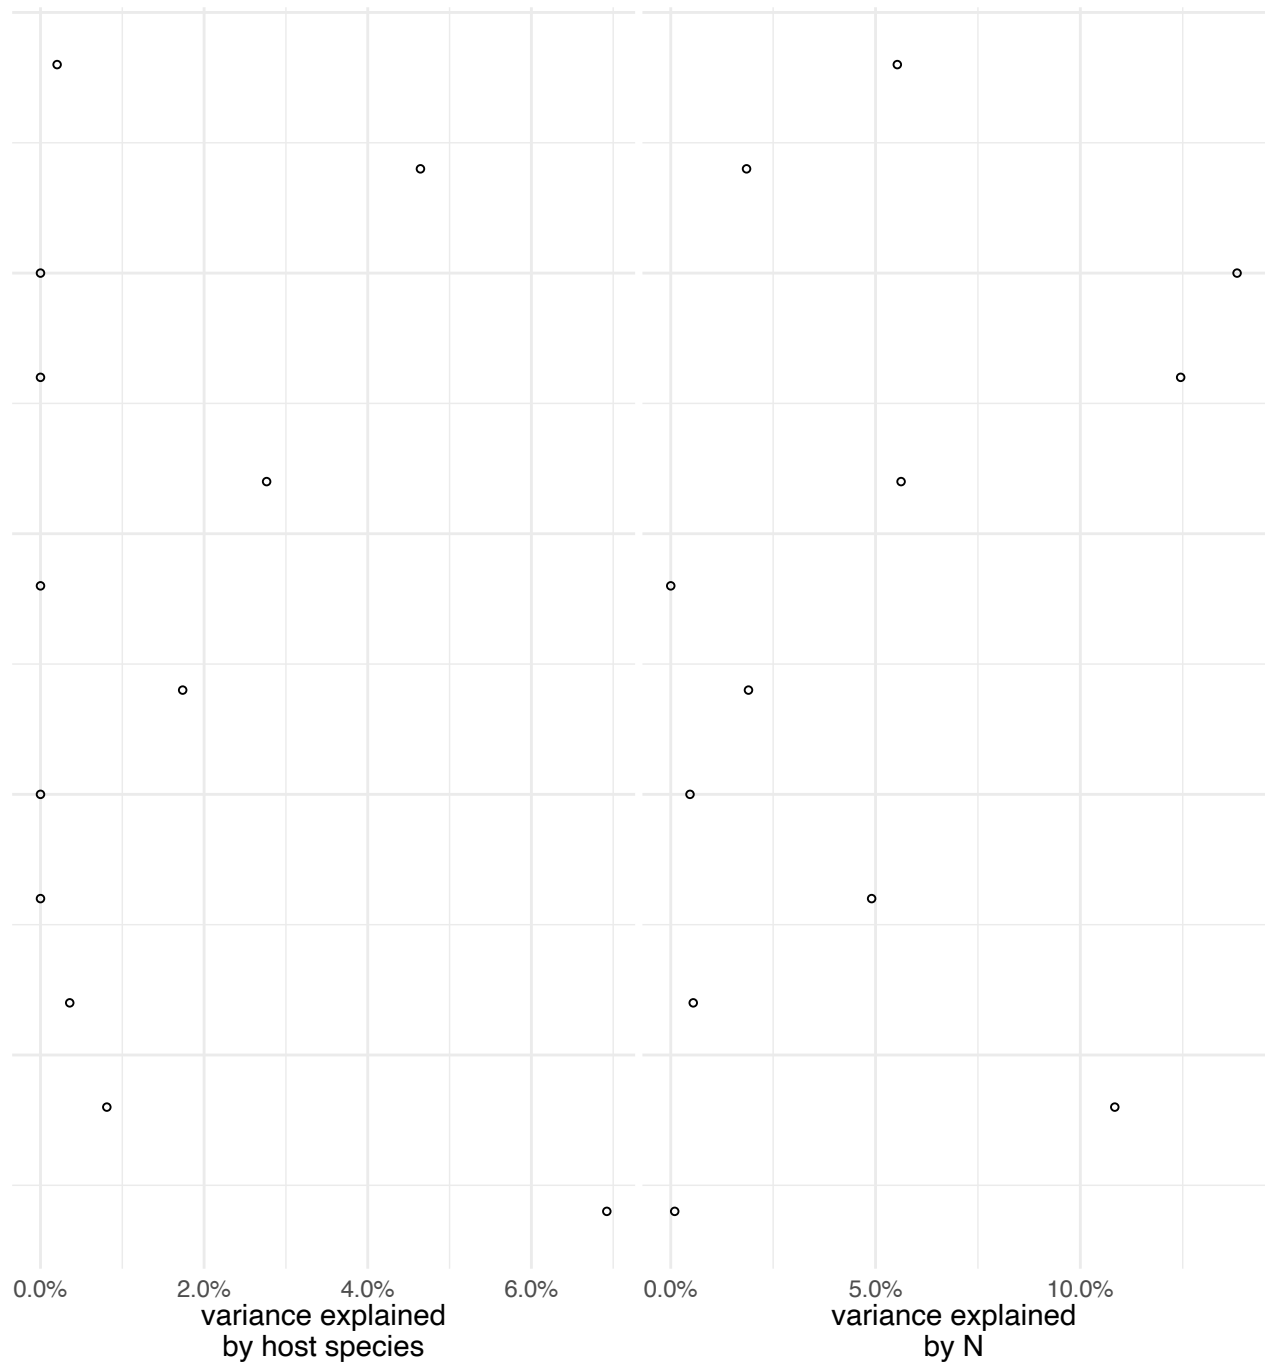

# Gaiella

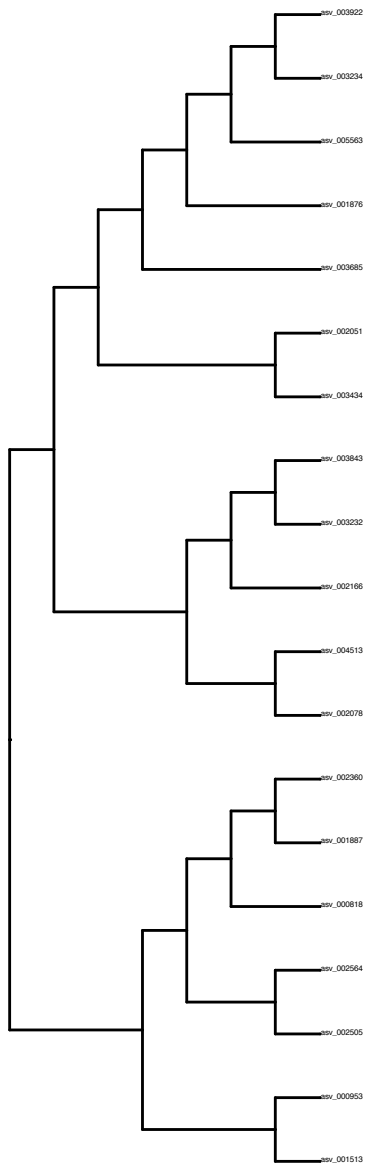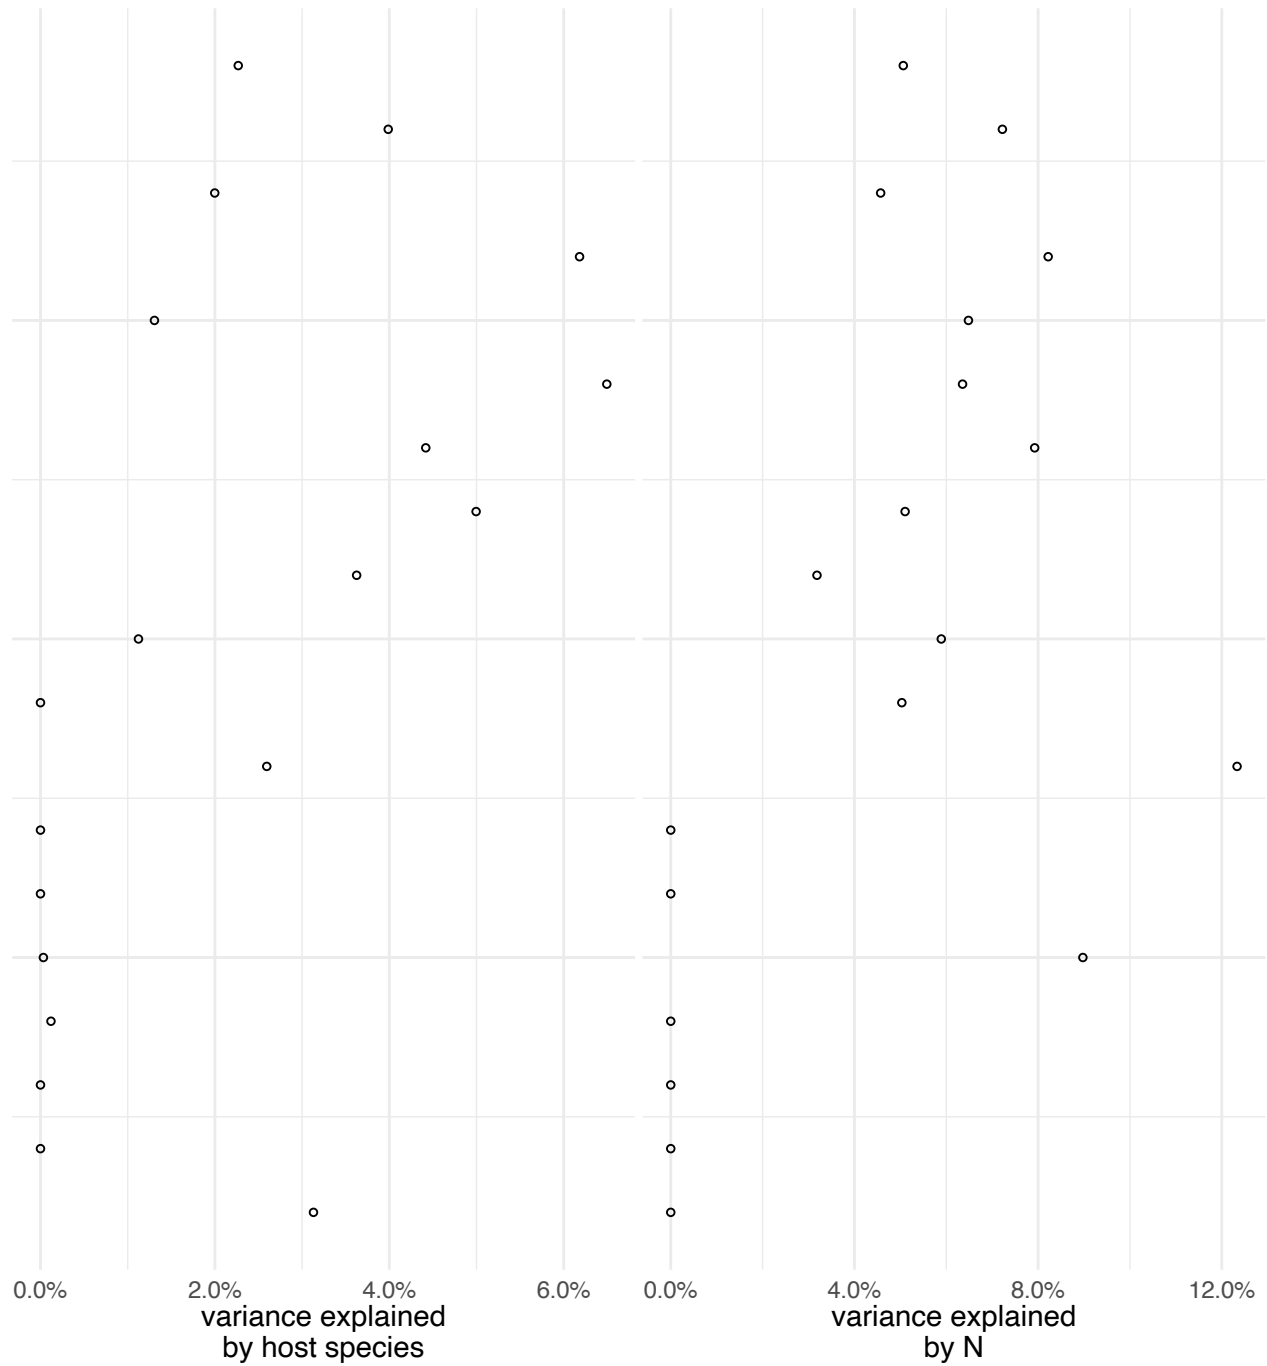

# Gemmatimonas

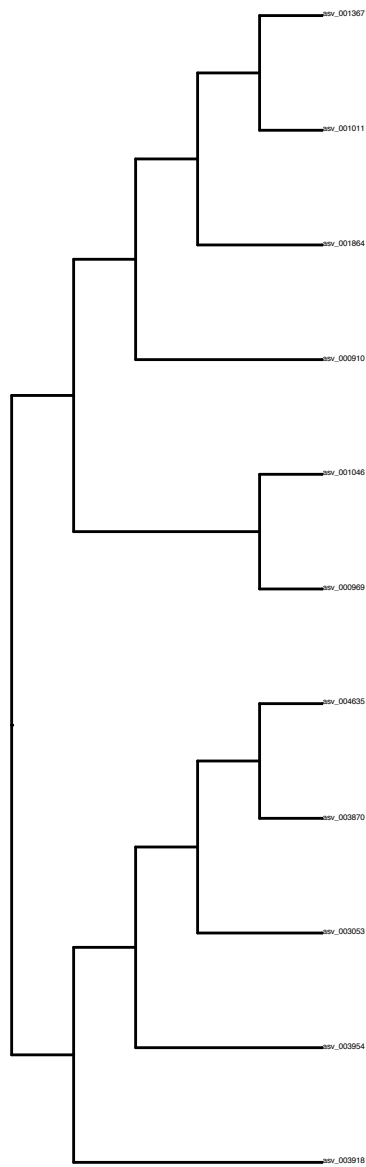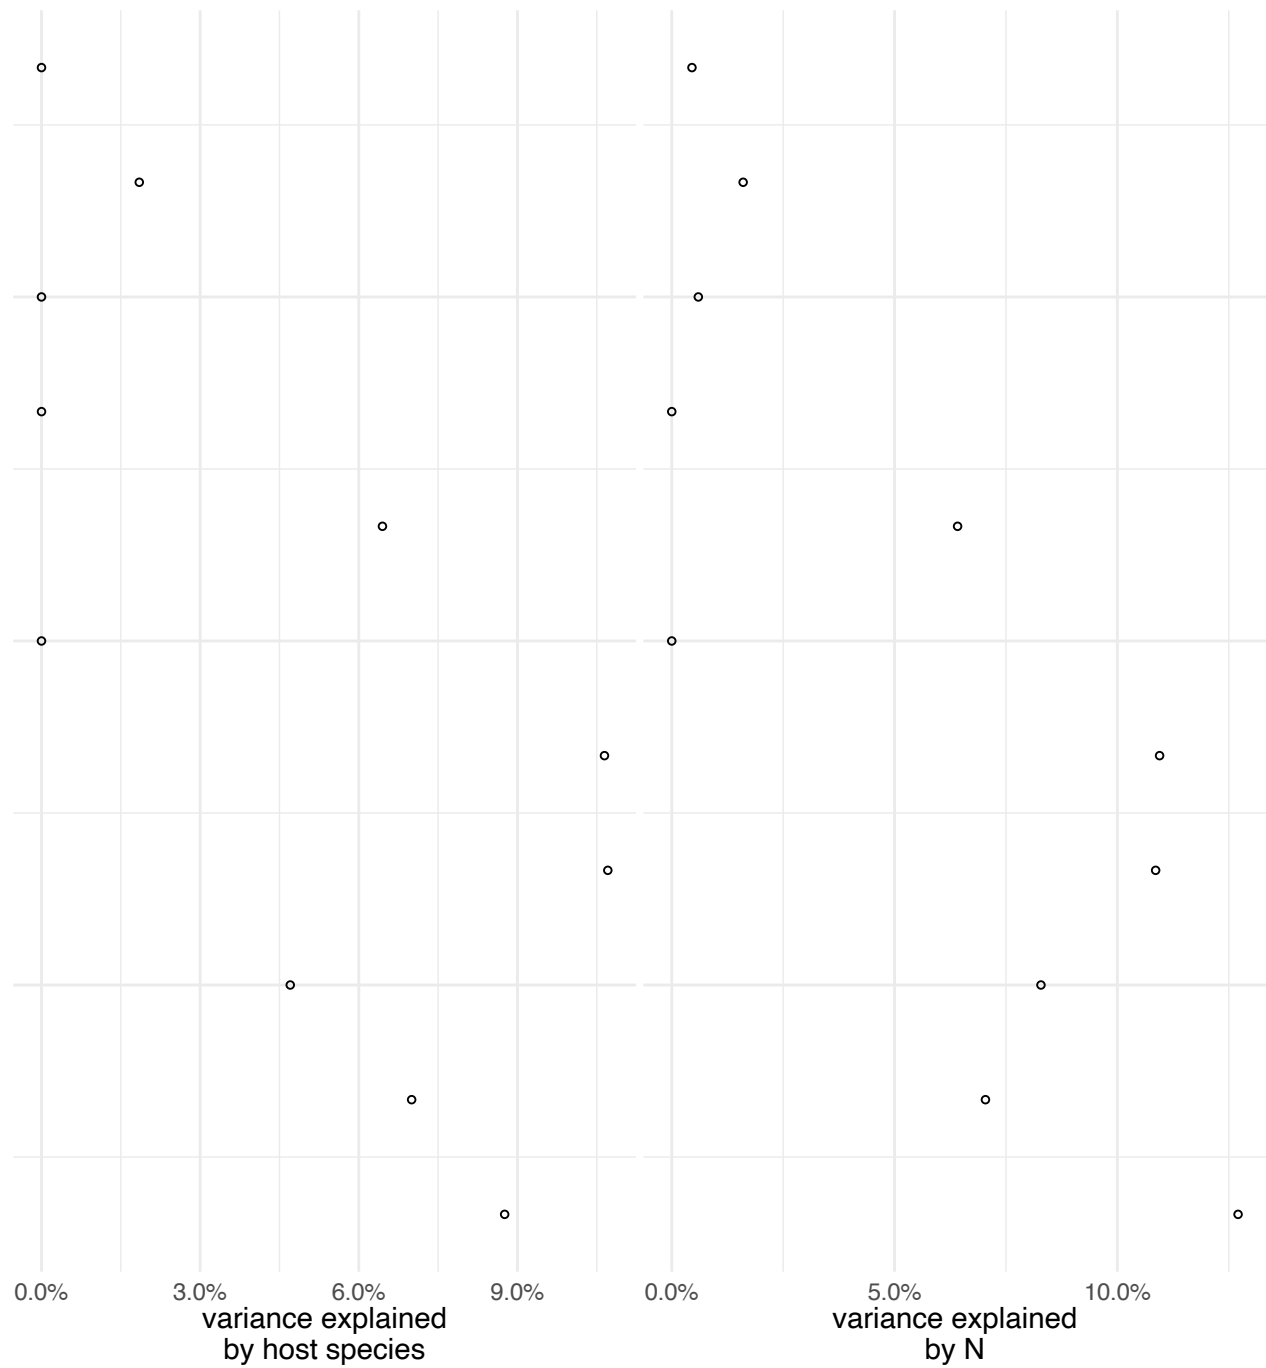

# Herbaspirillum

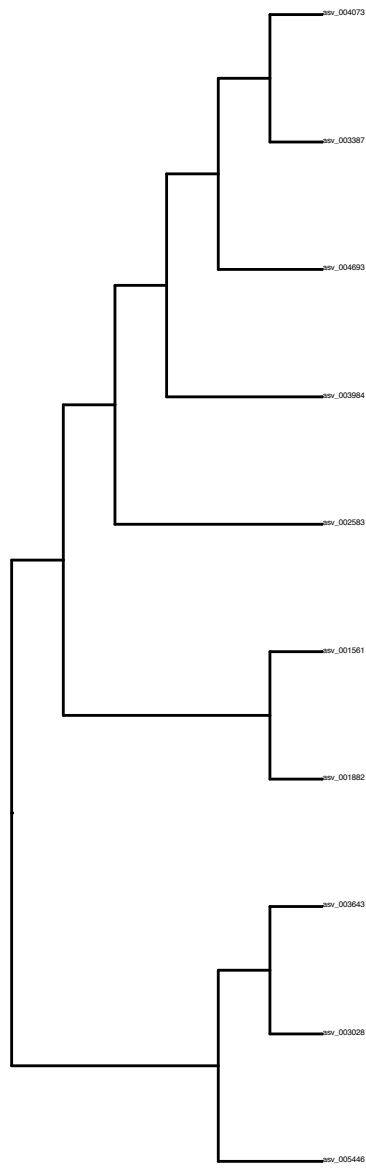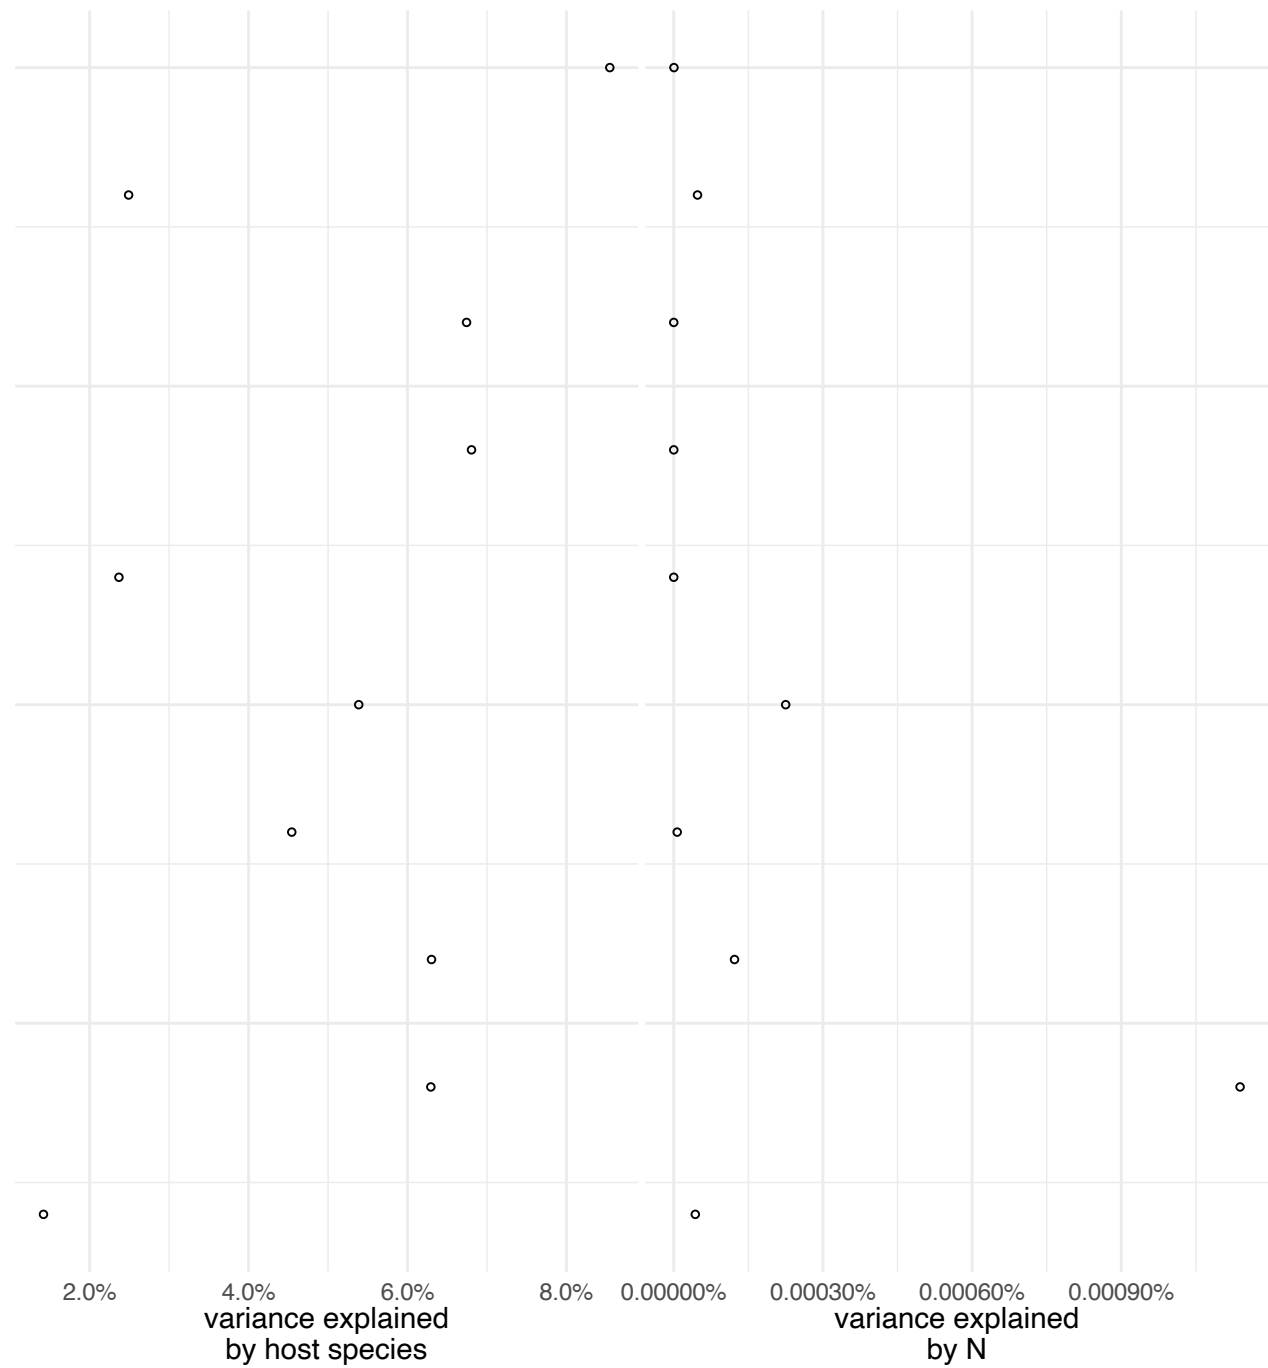



# Inquilinus

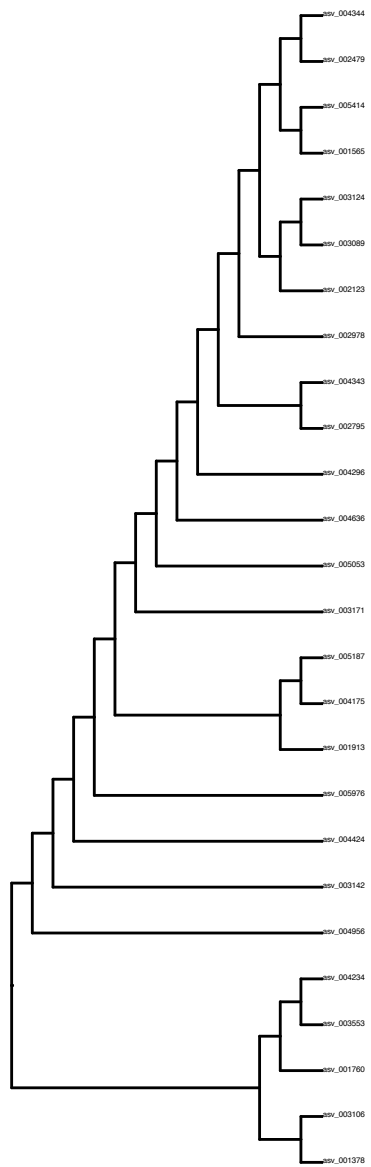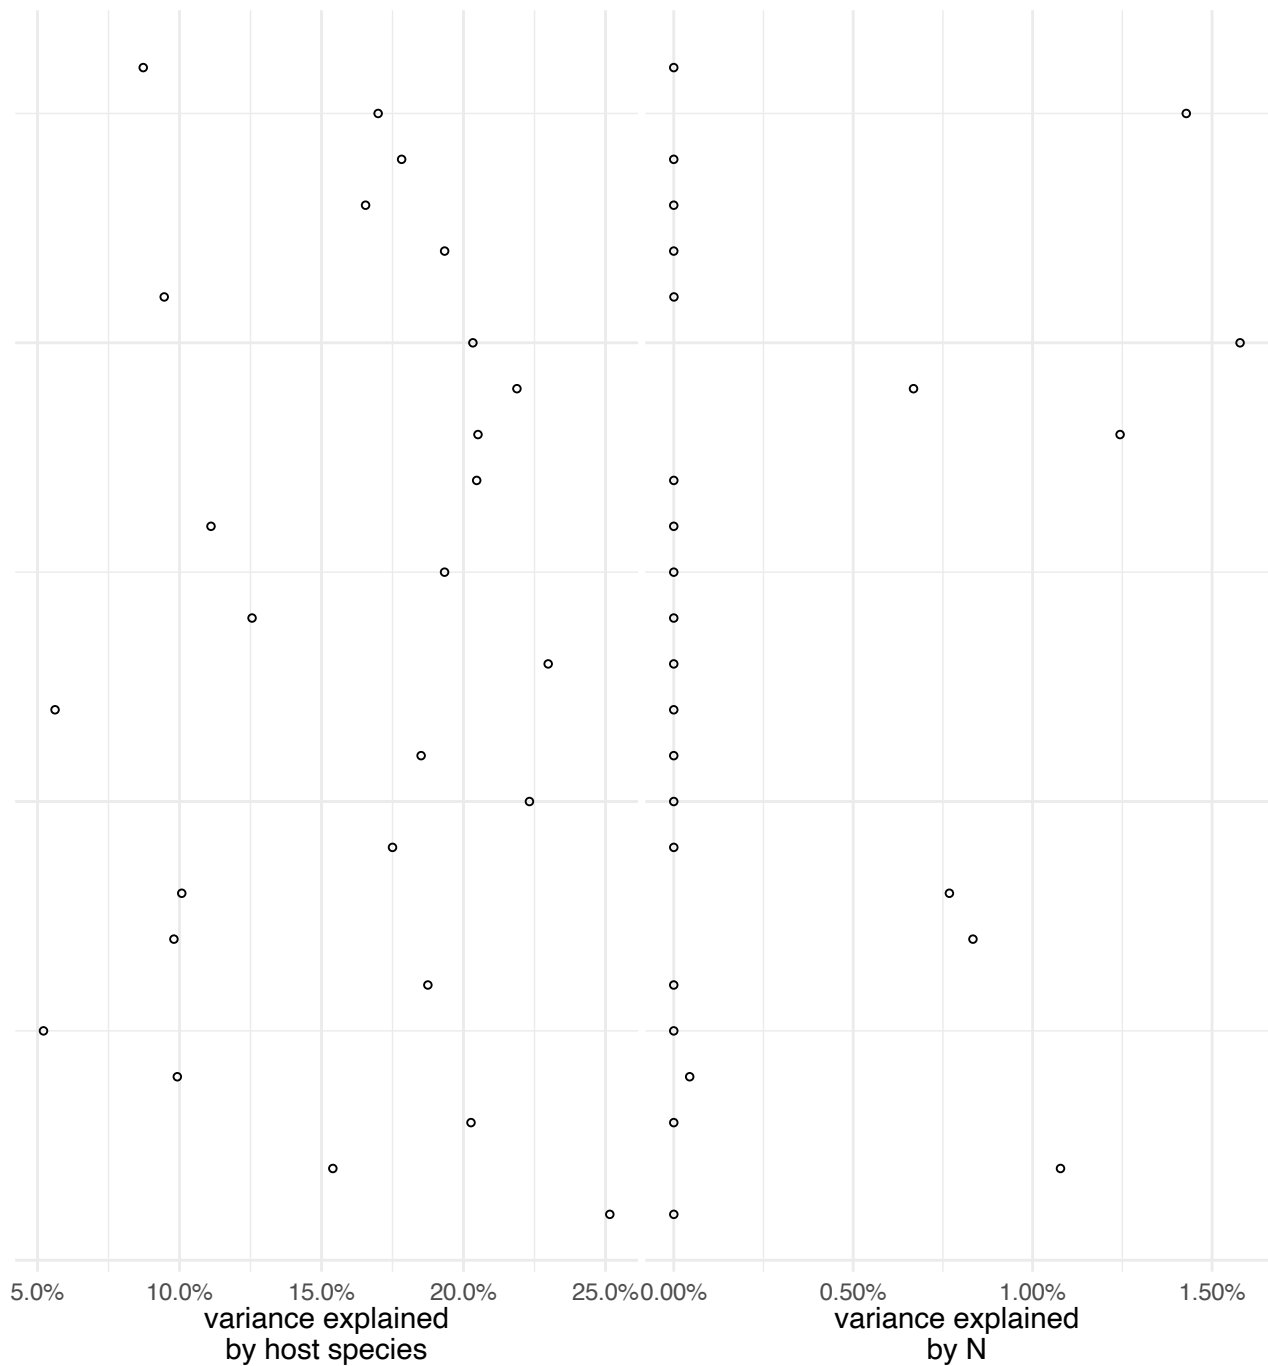

# Lapillicoccus

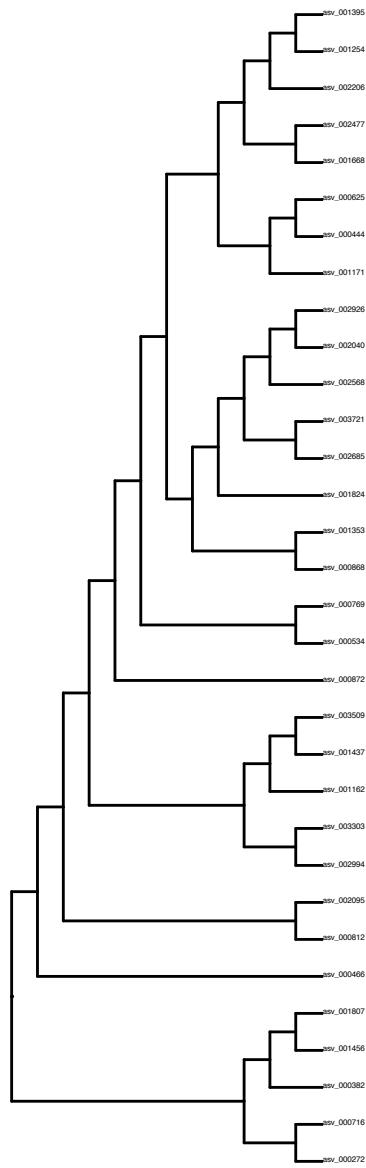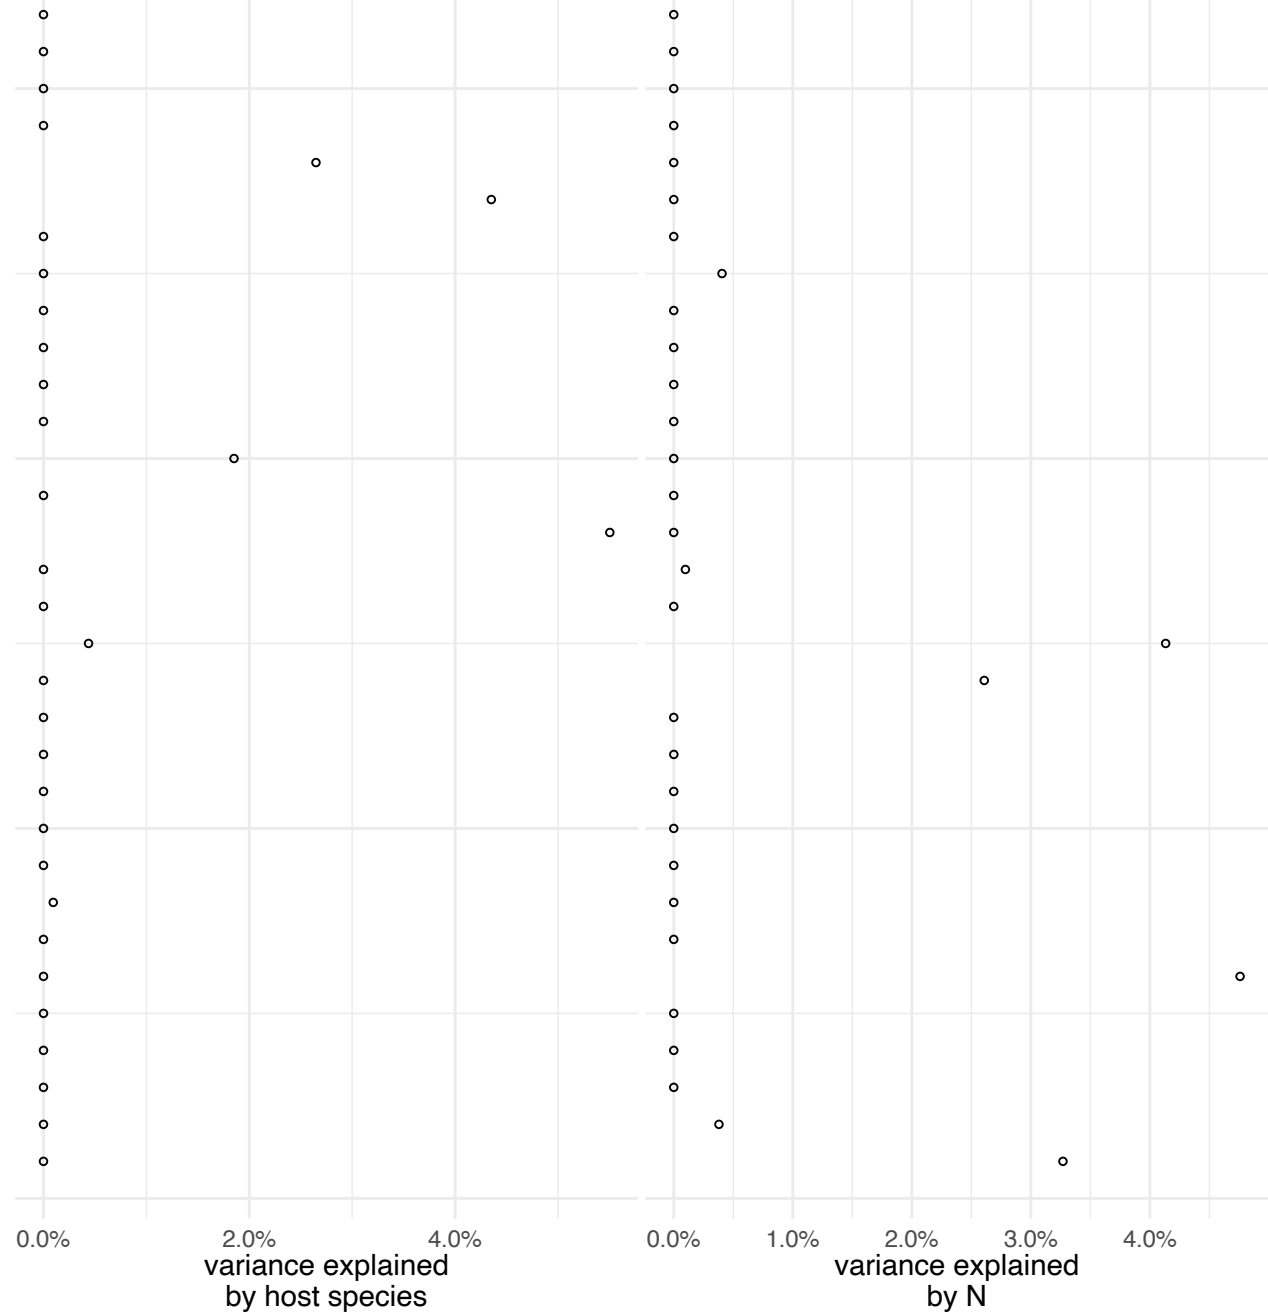

# Limnobacter

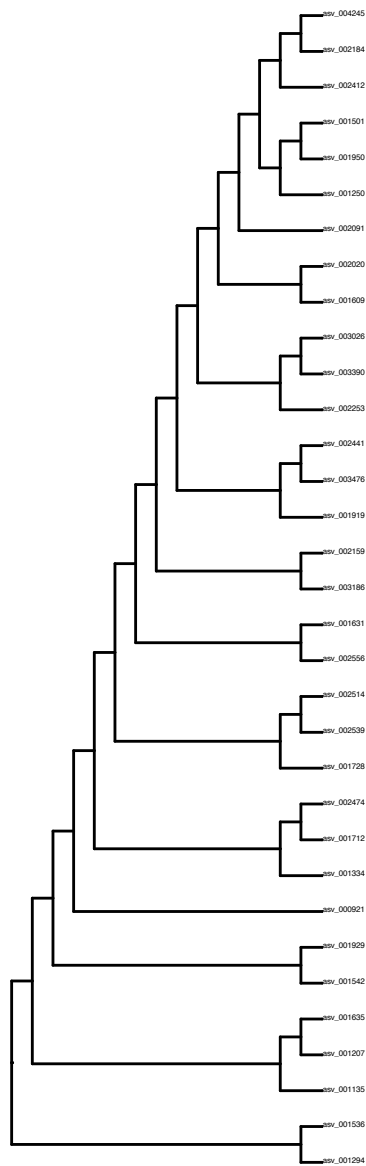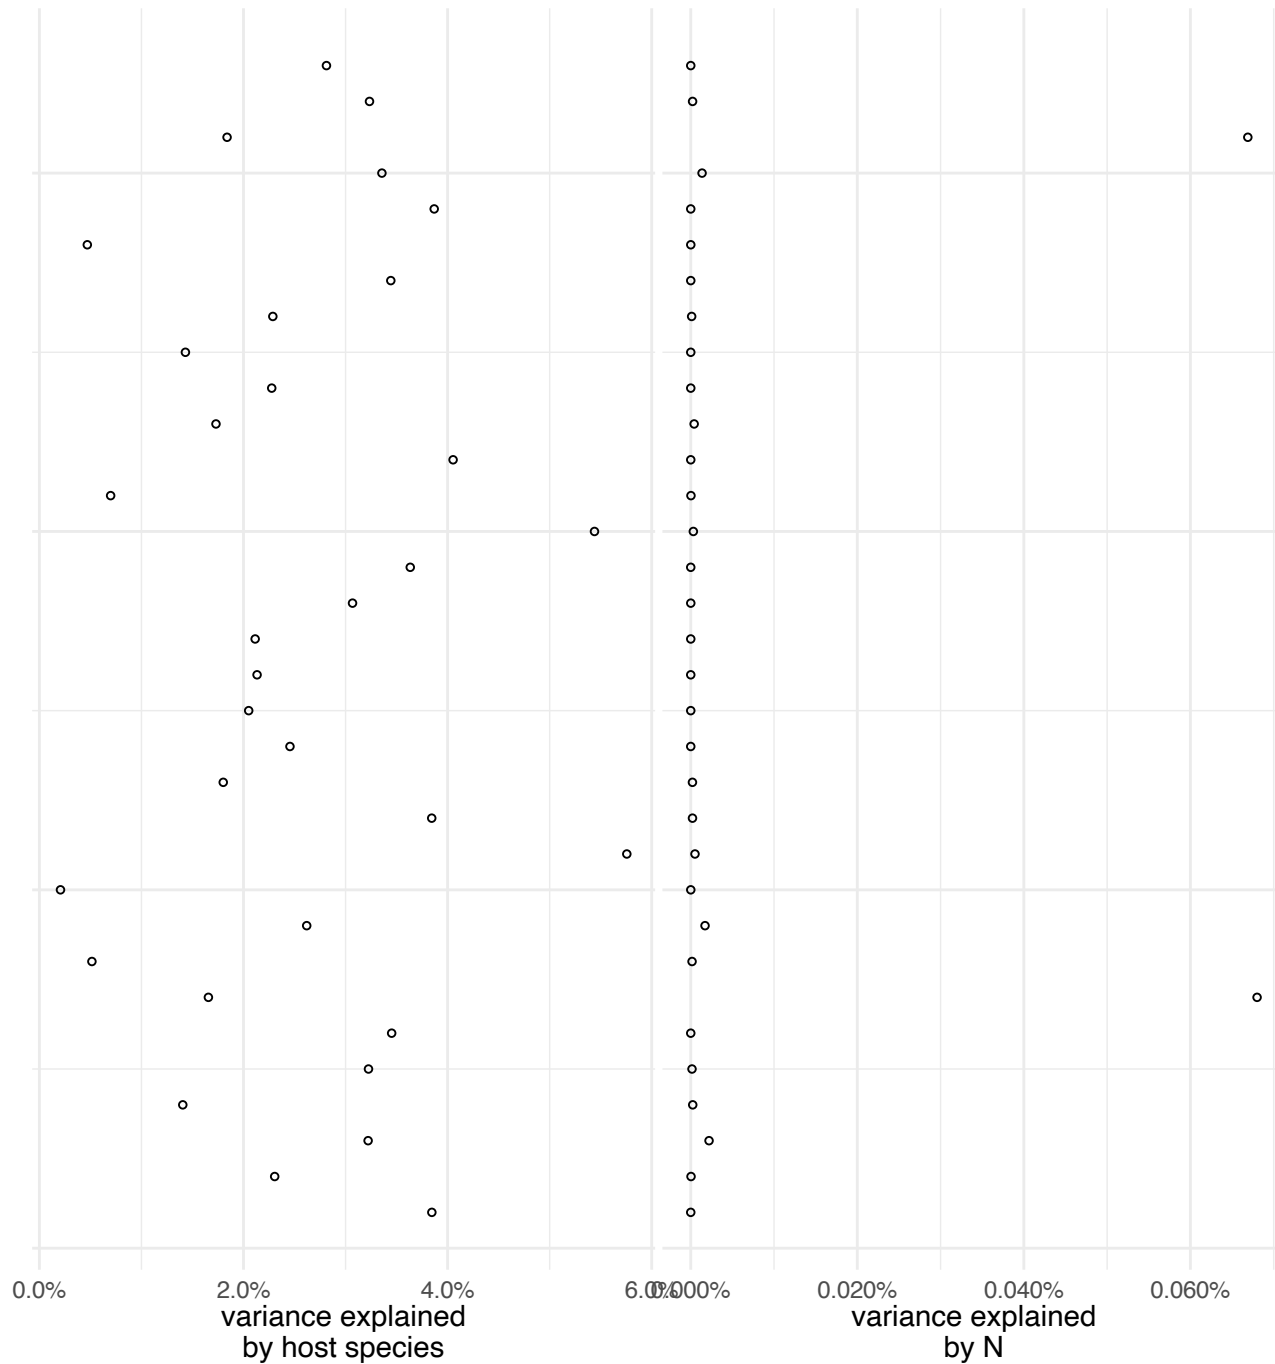

# Marmoricola

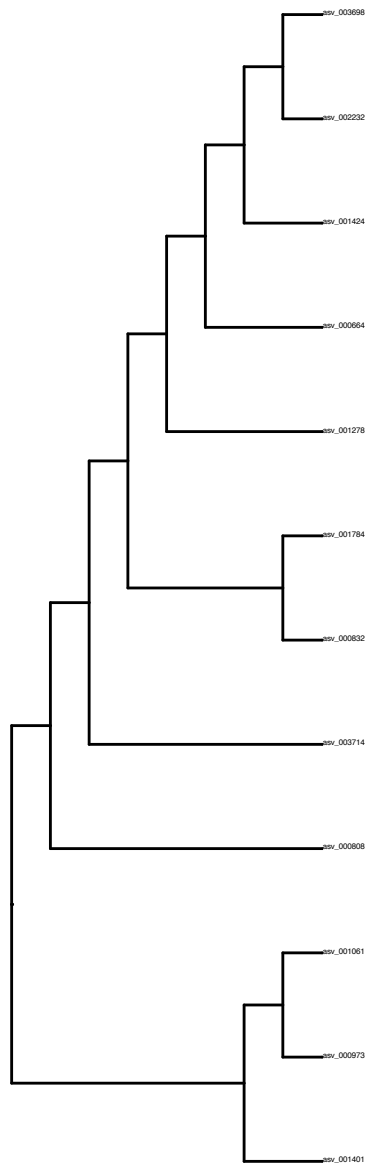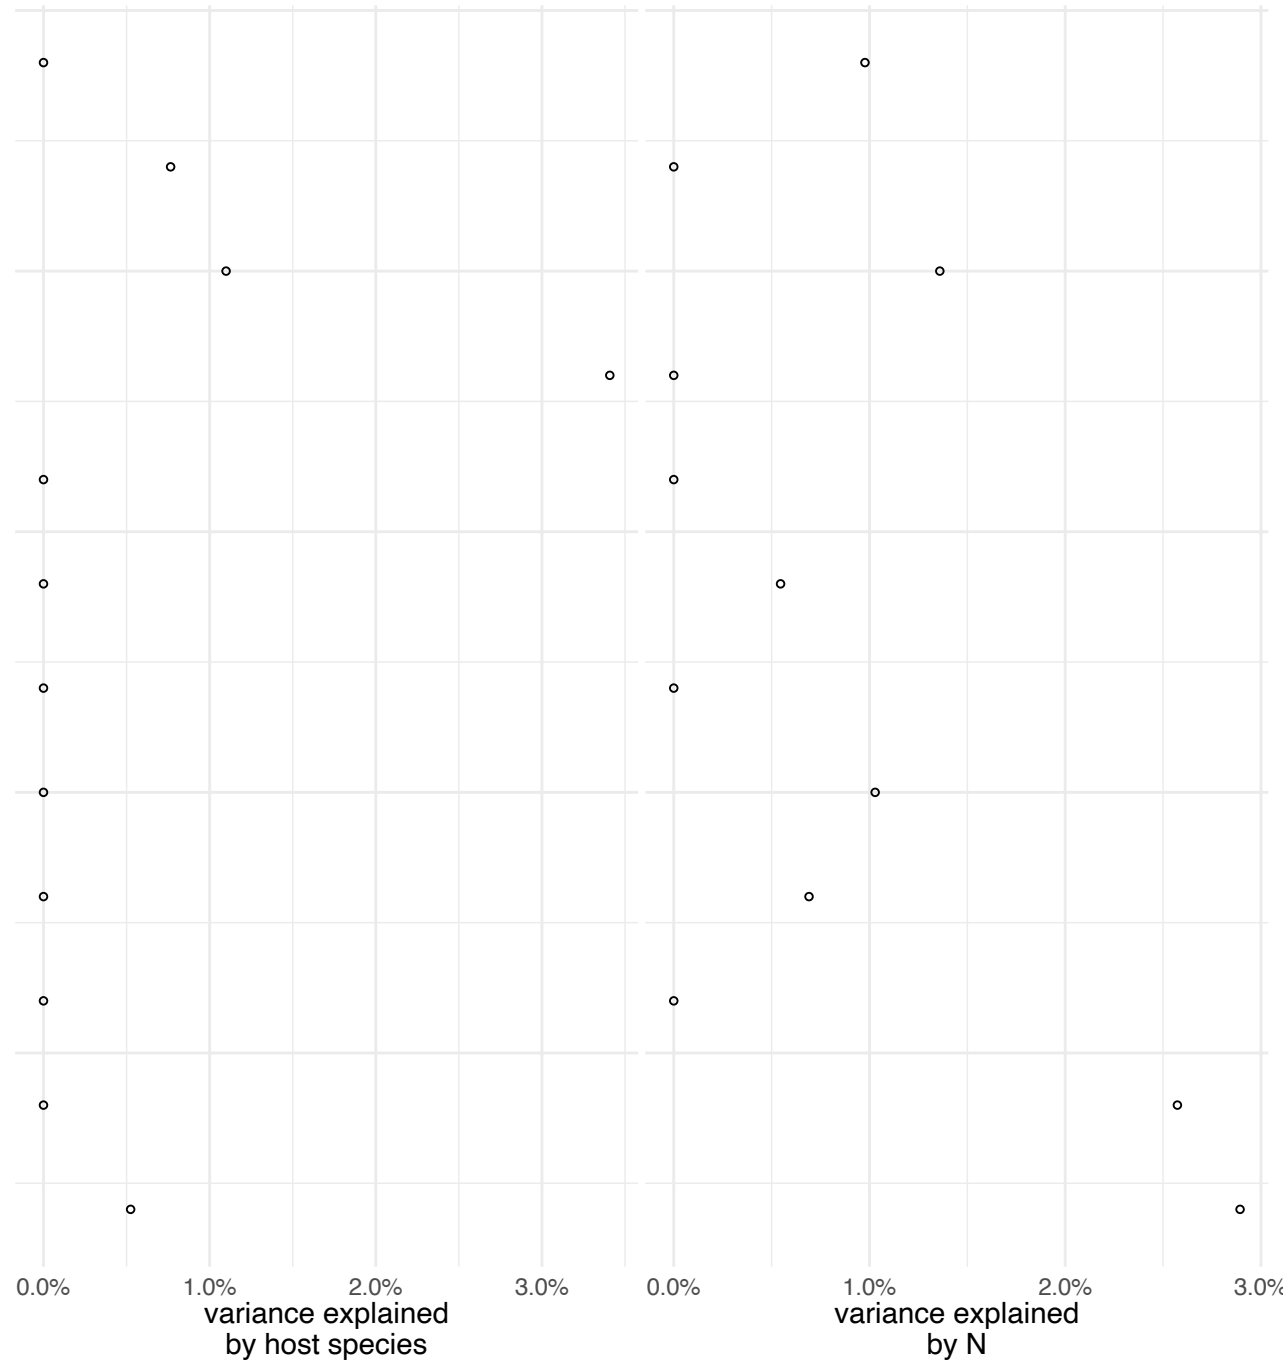



# Microlunatus

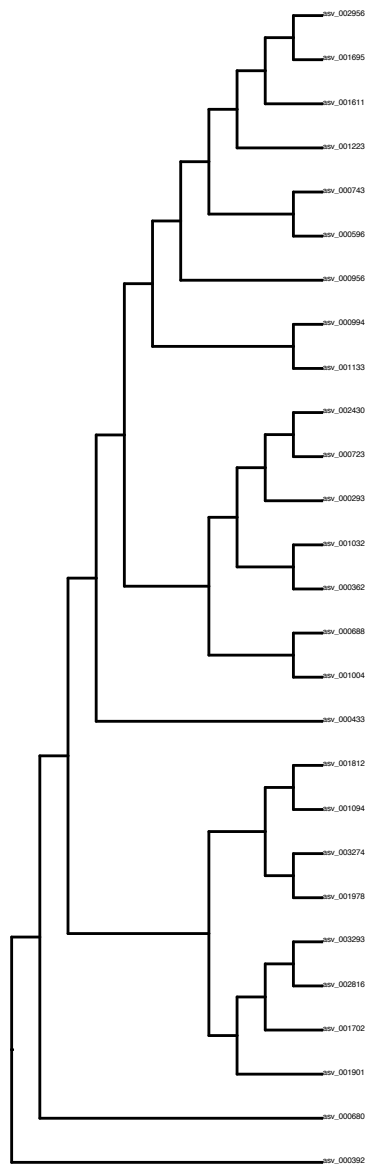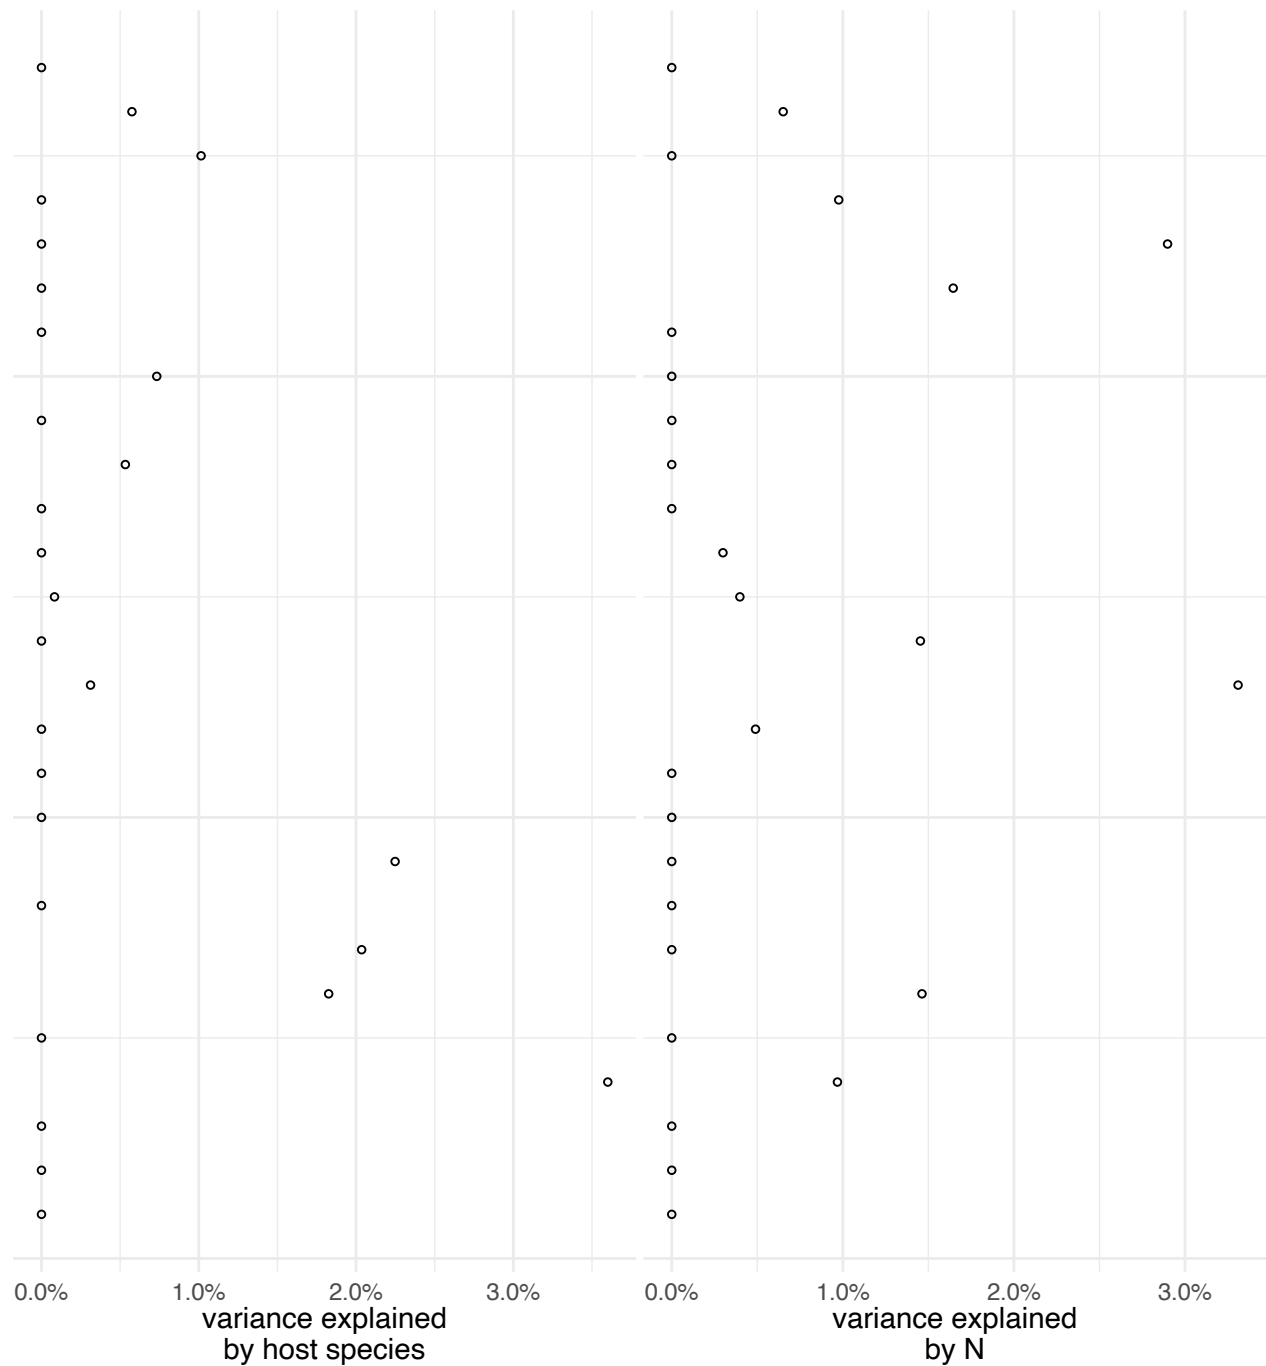

# Microvirga

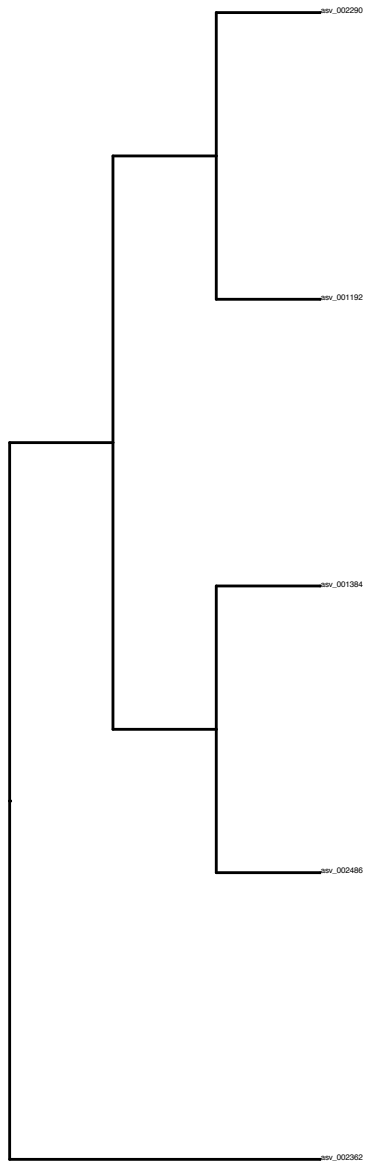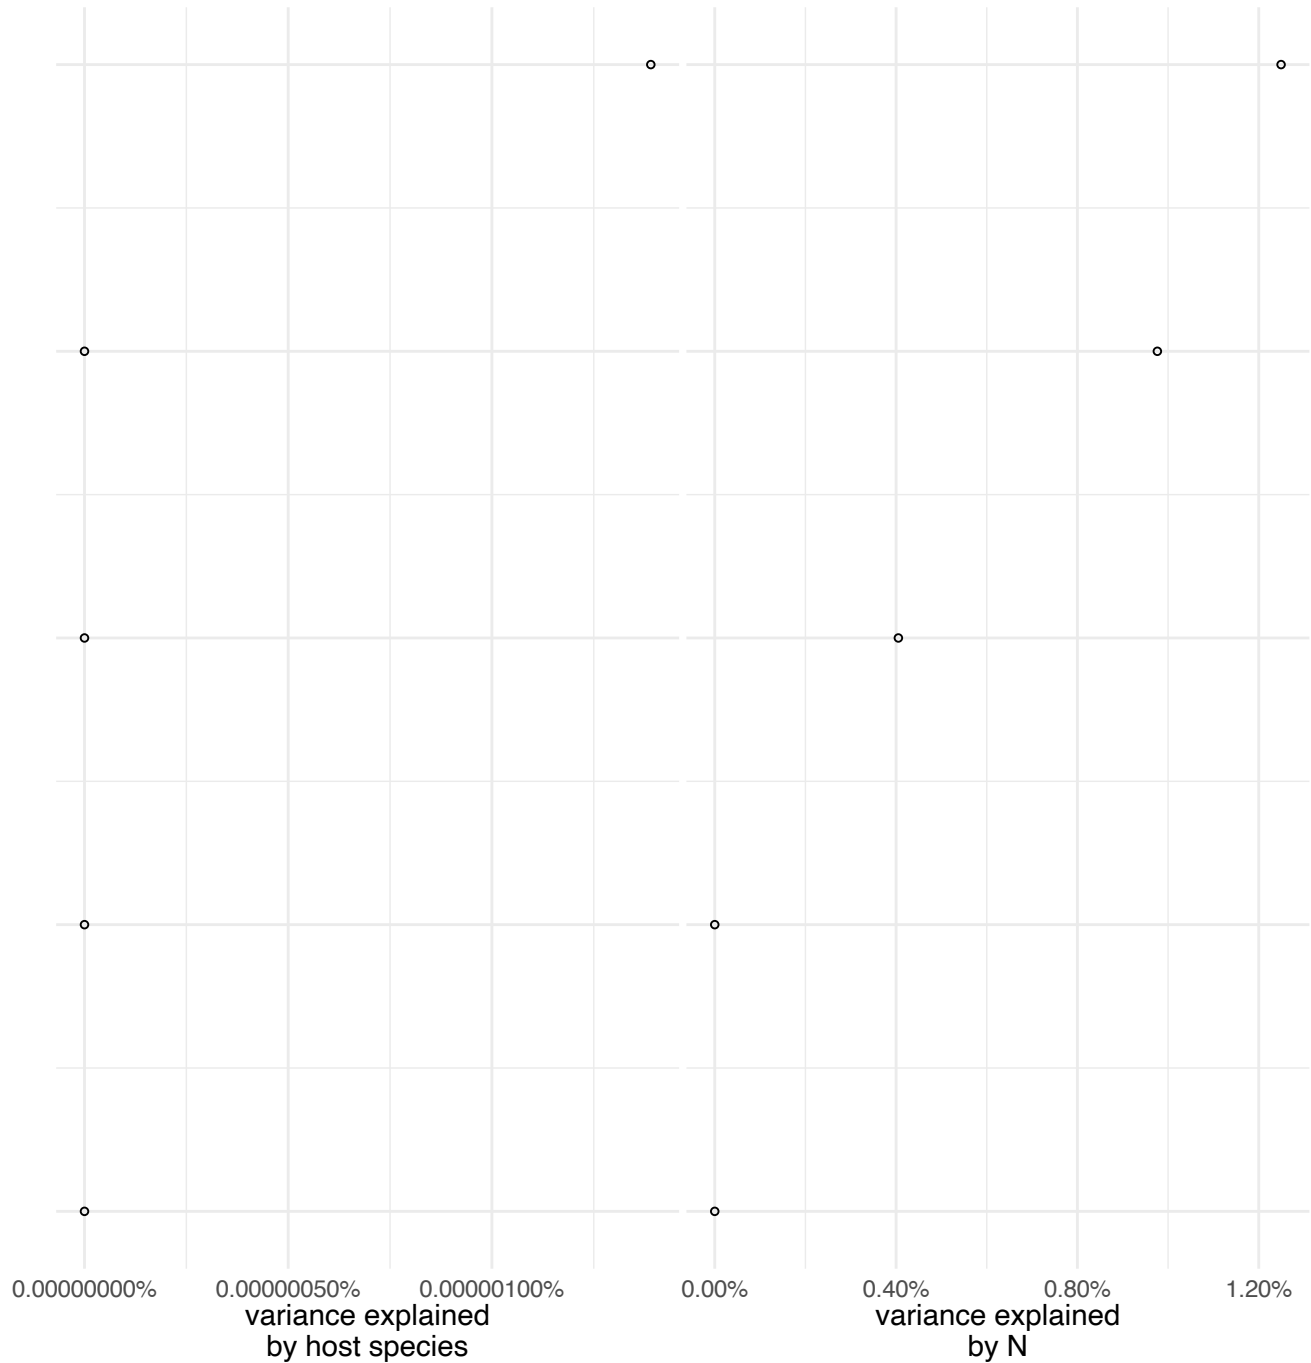

# mle1-7

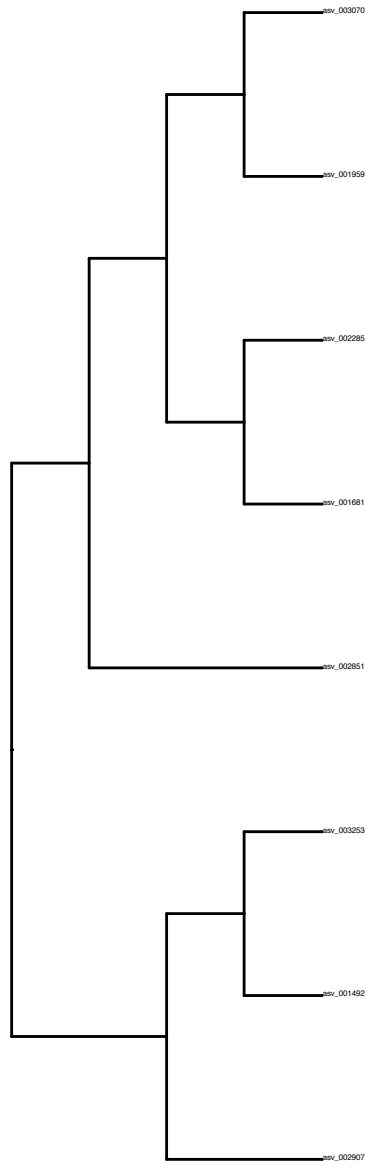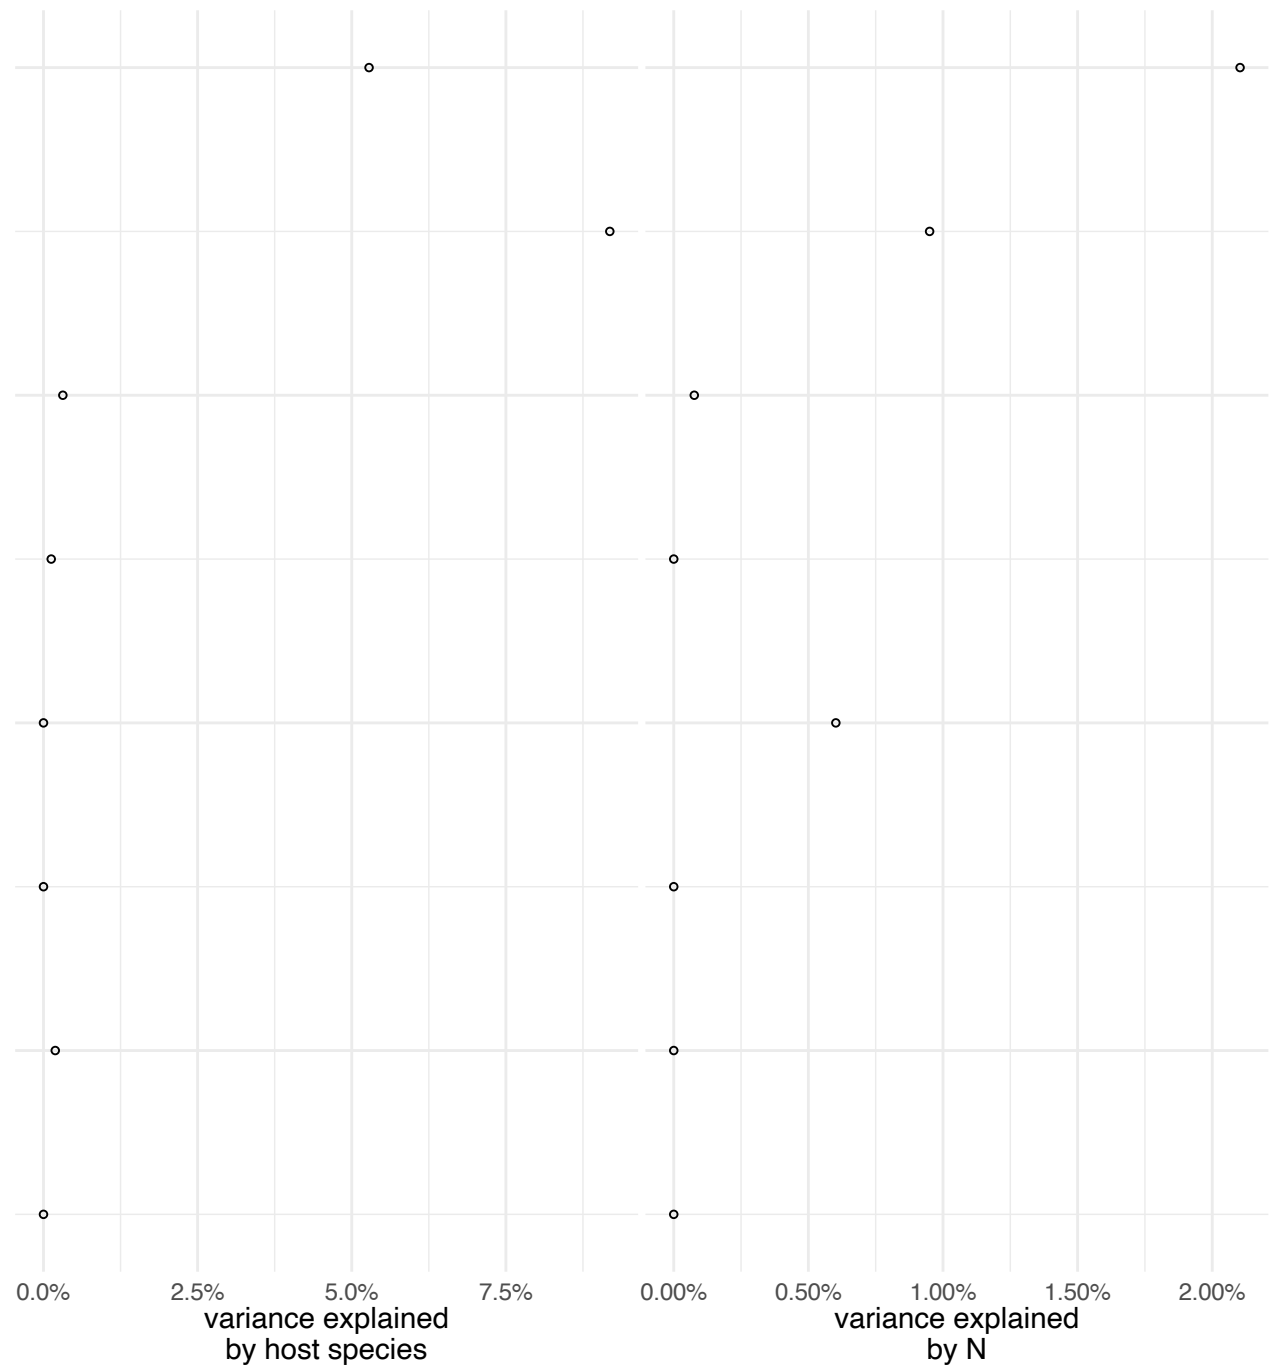



# MND1

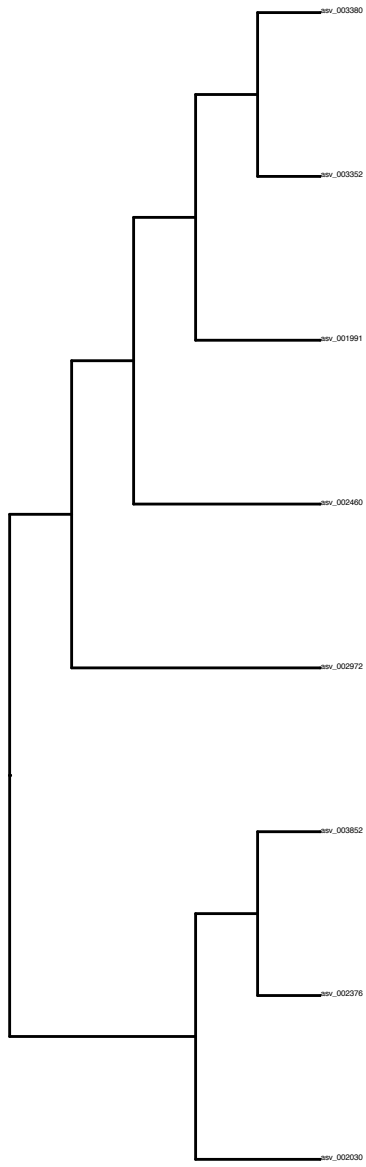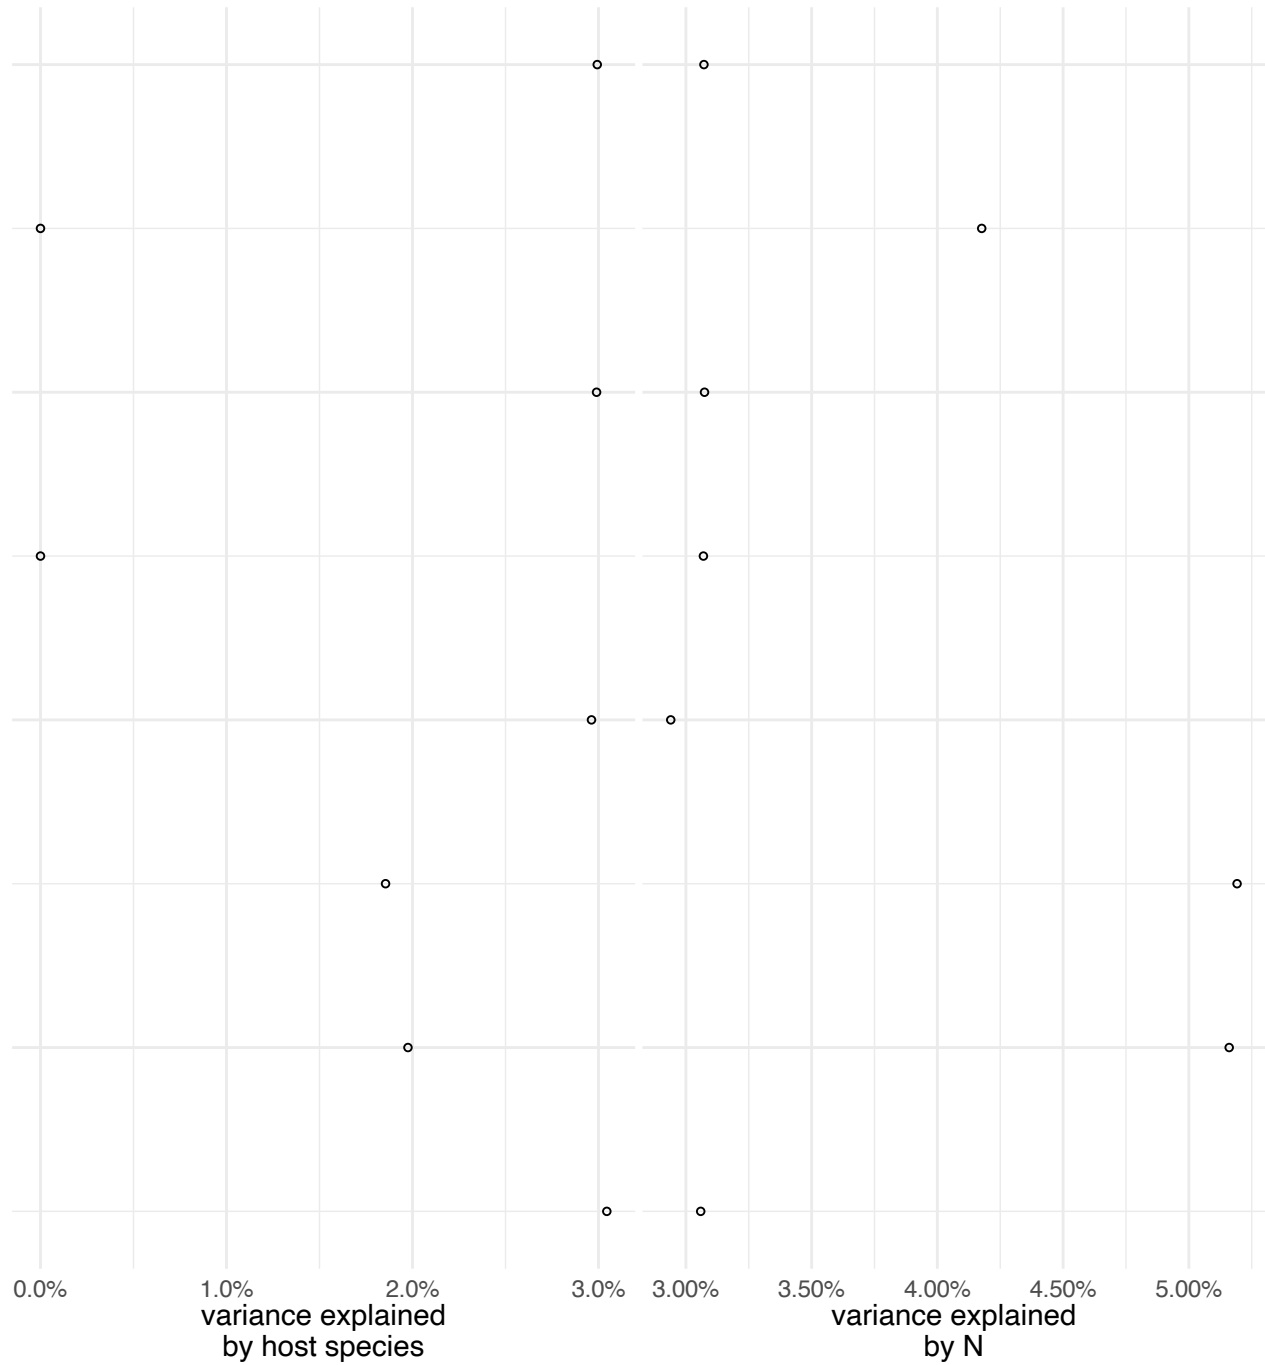

# Nitrosospira

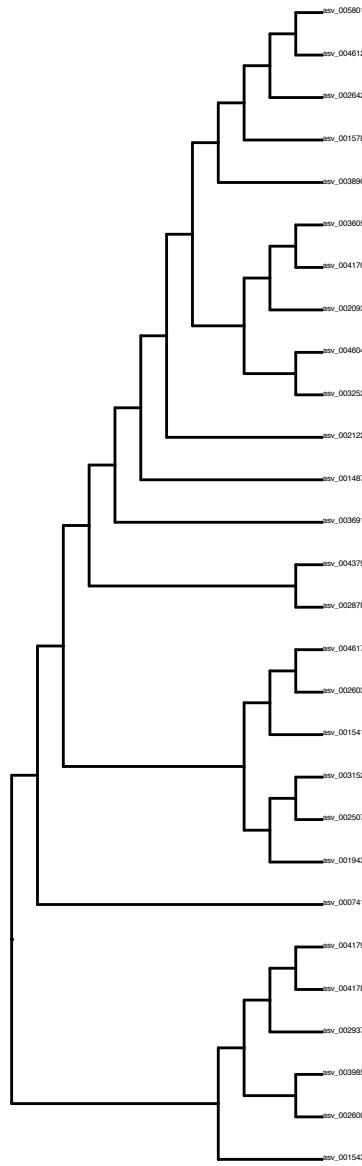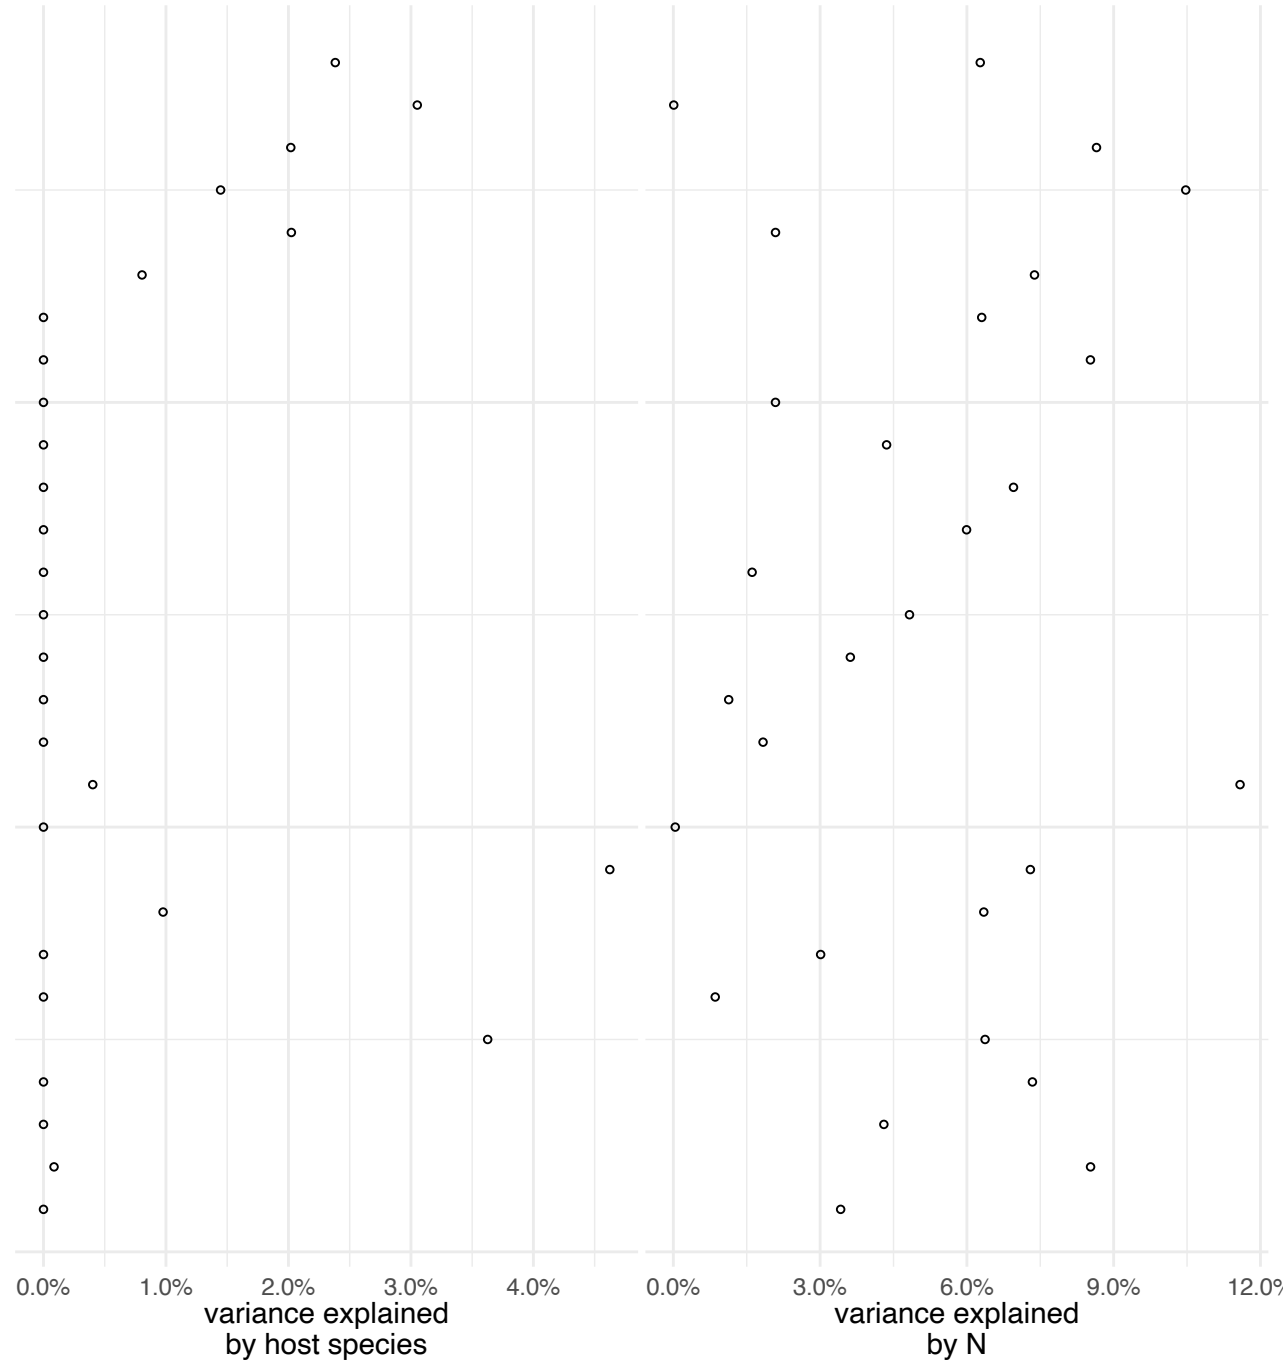

# Nitrospira

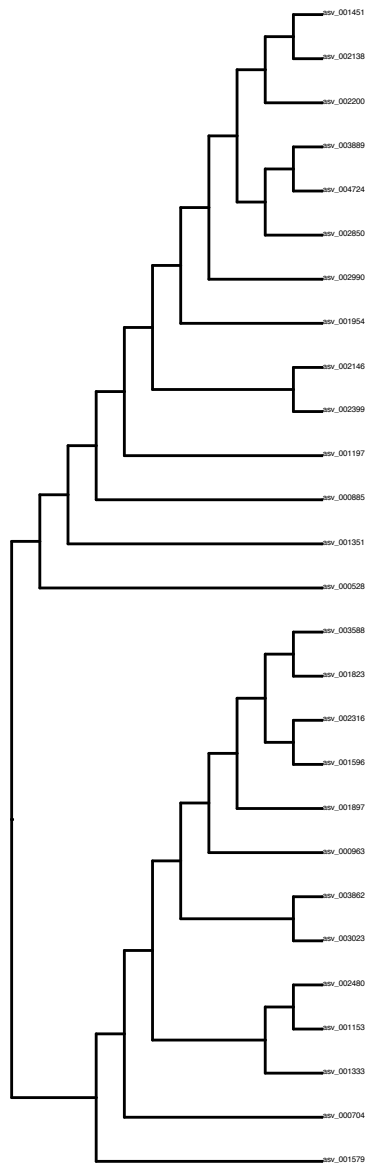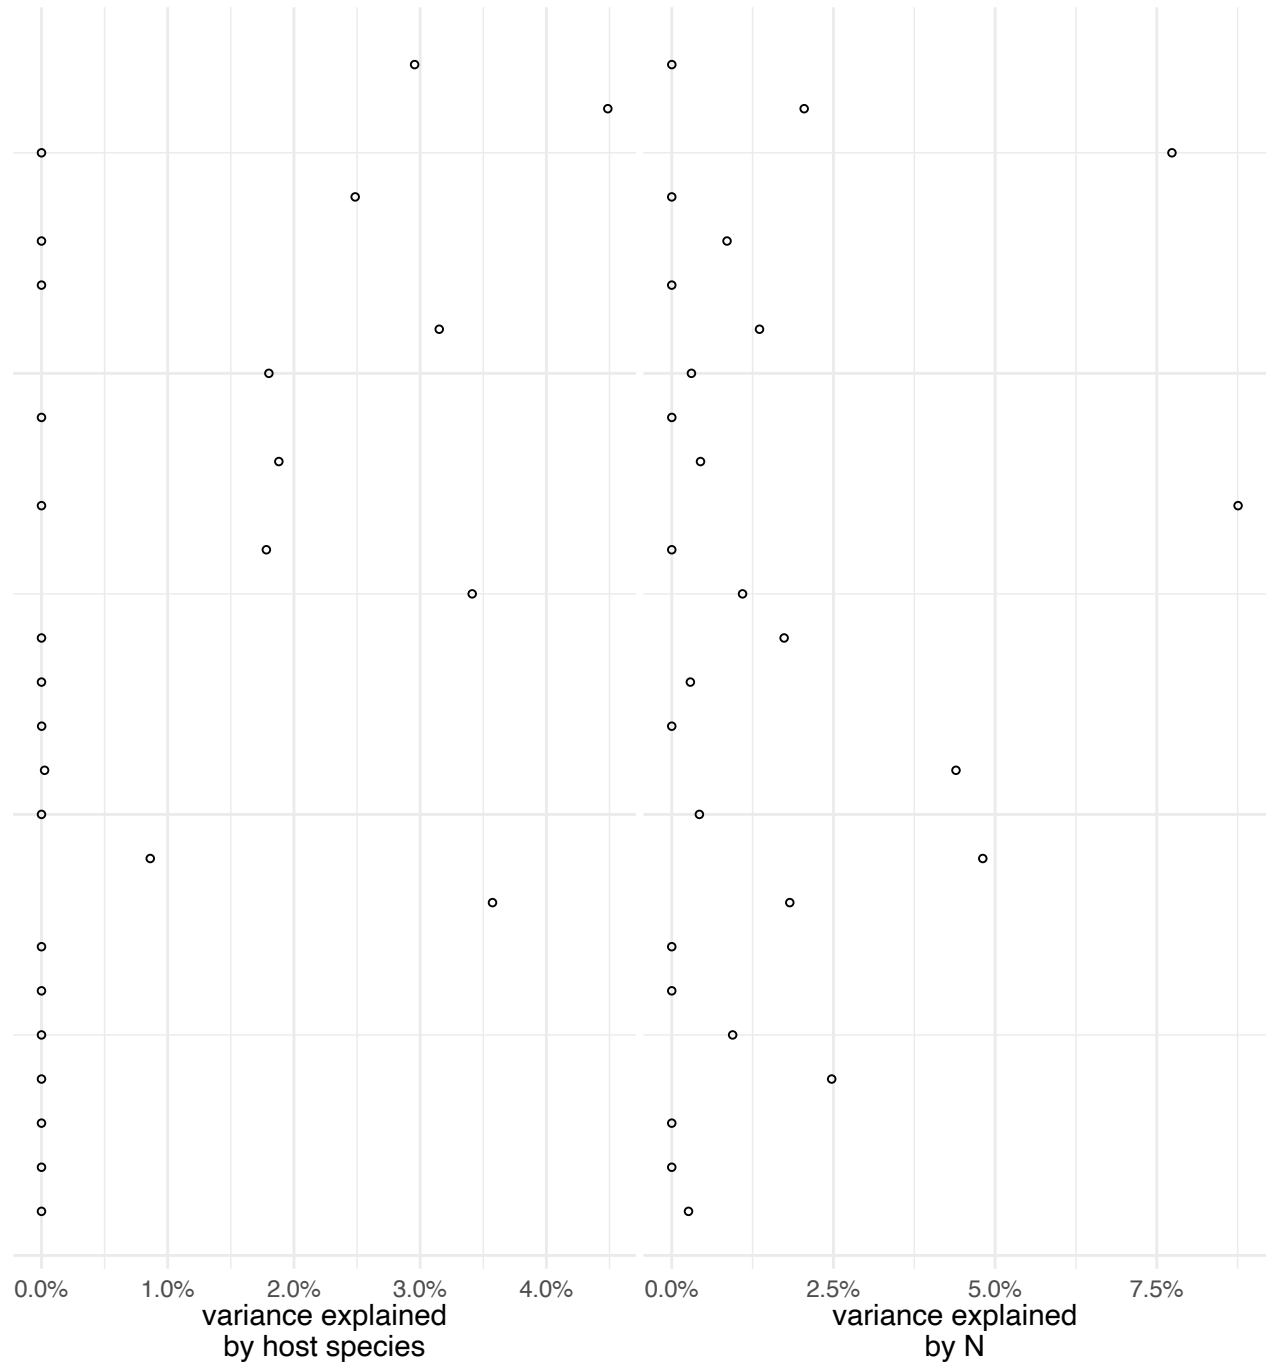

# Nocardioides

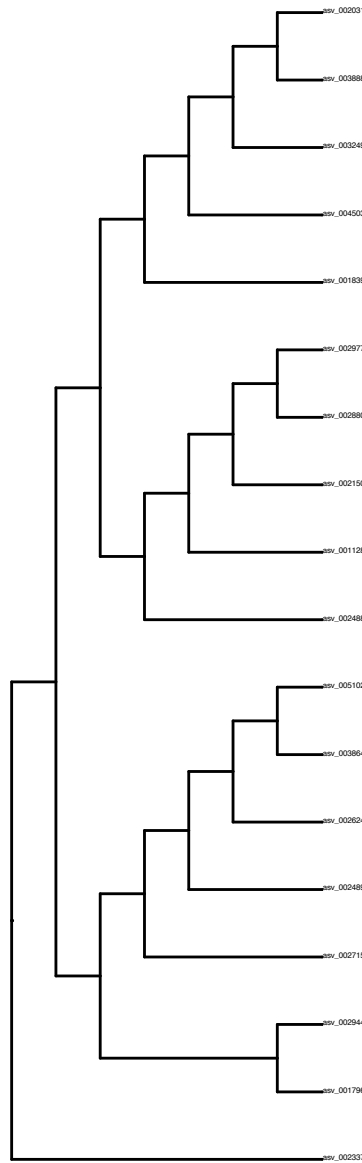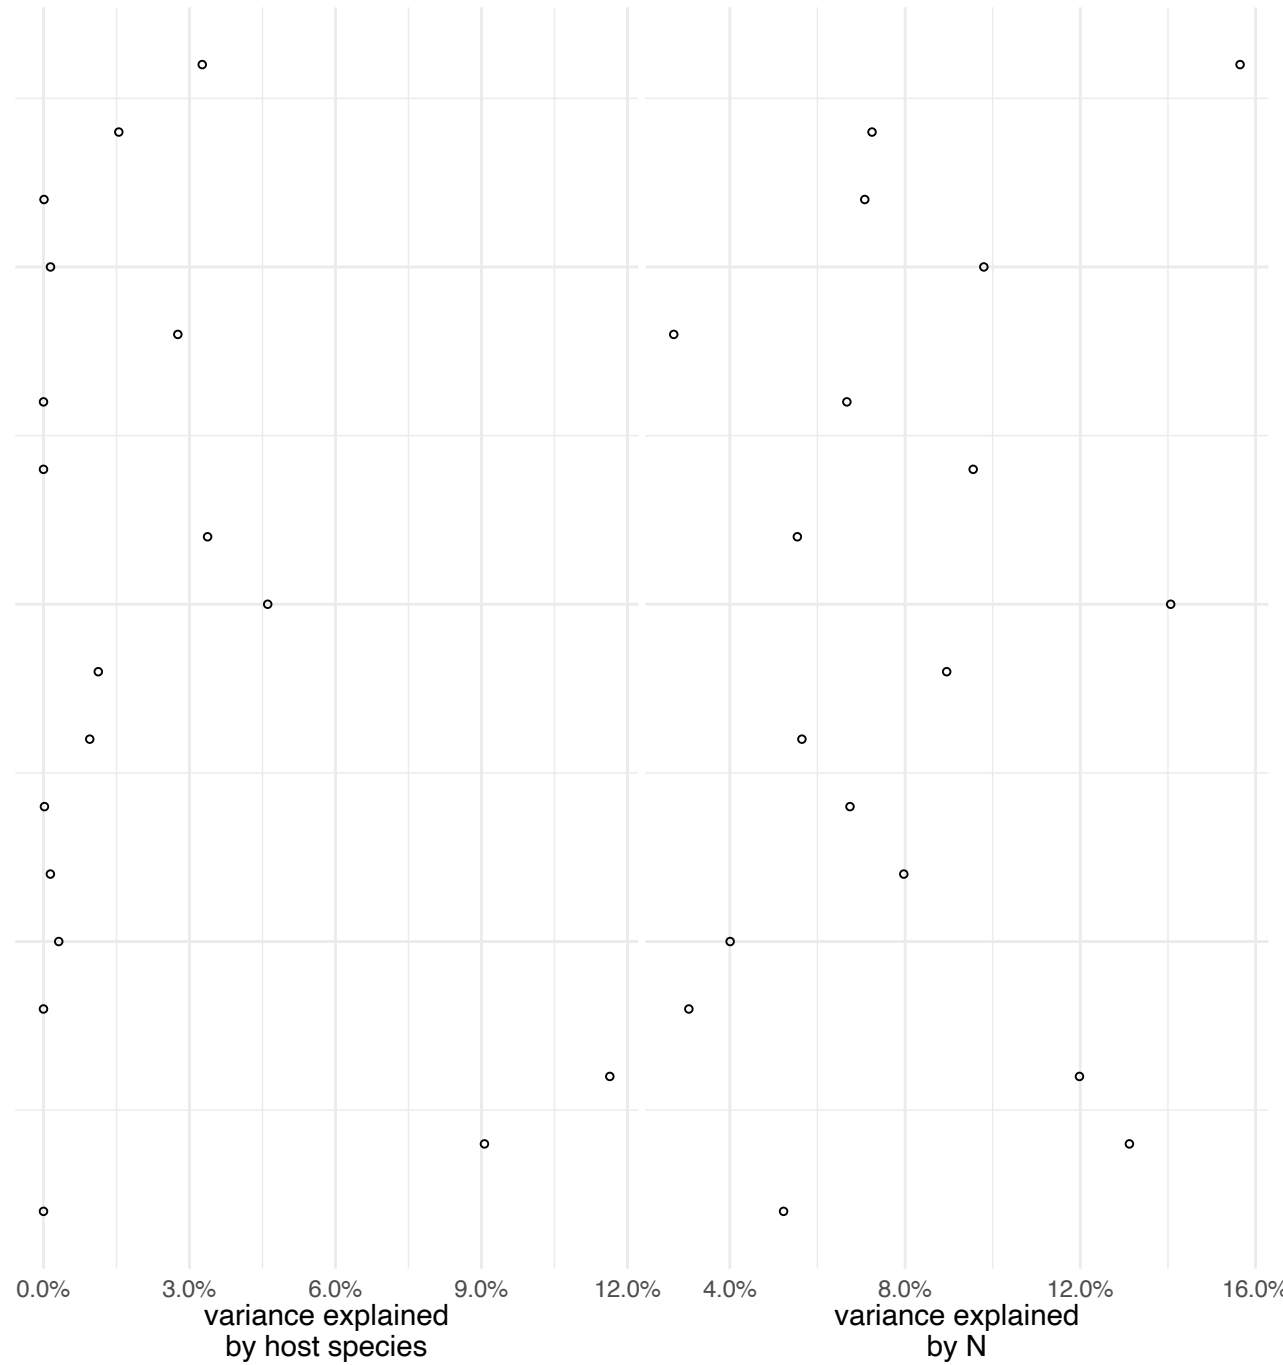

# Nordella

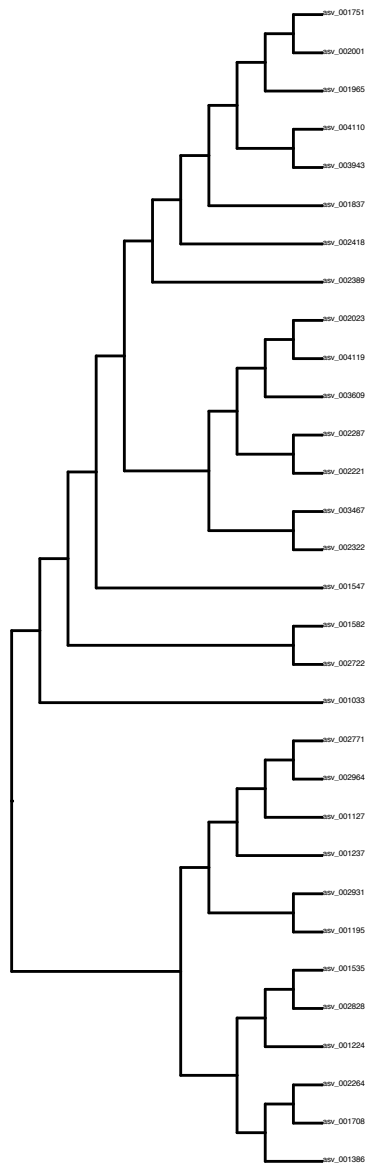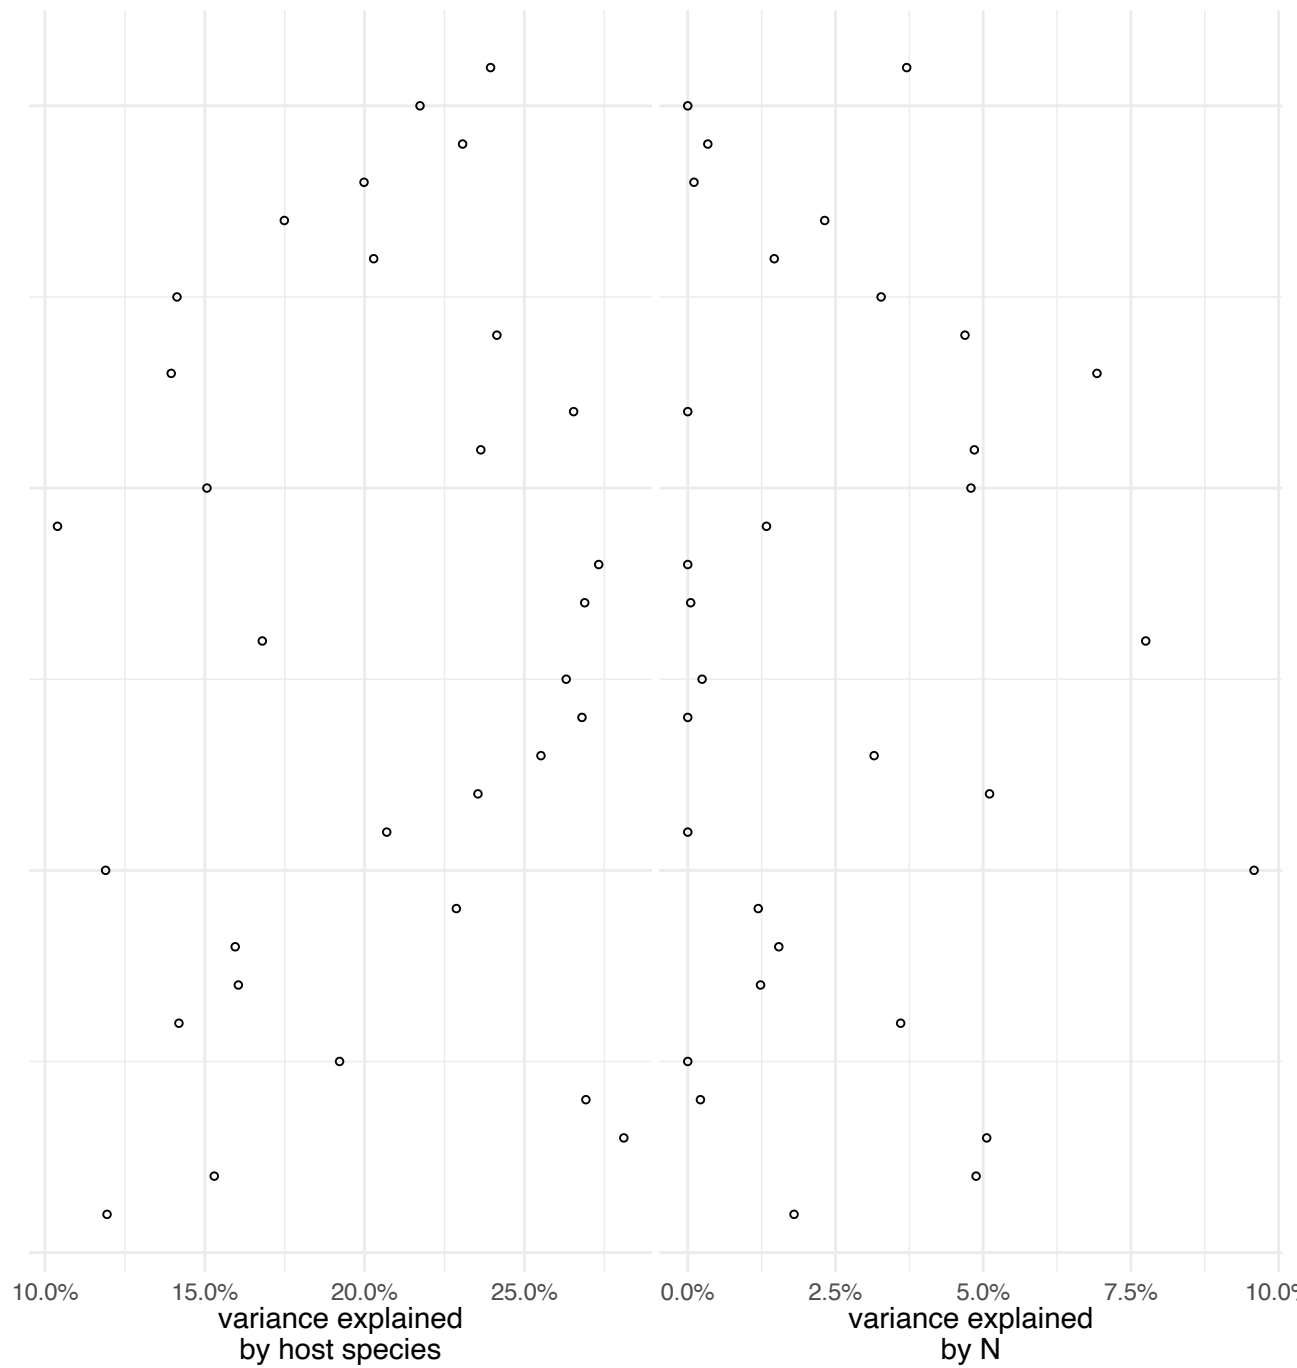

# Novosphingobium

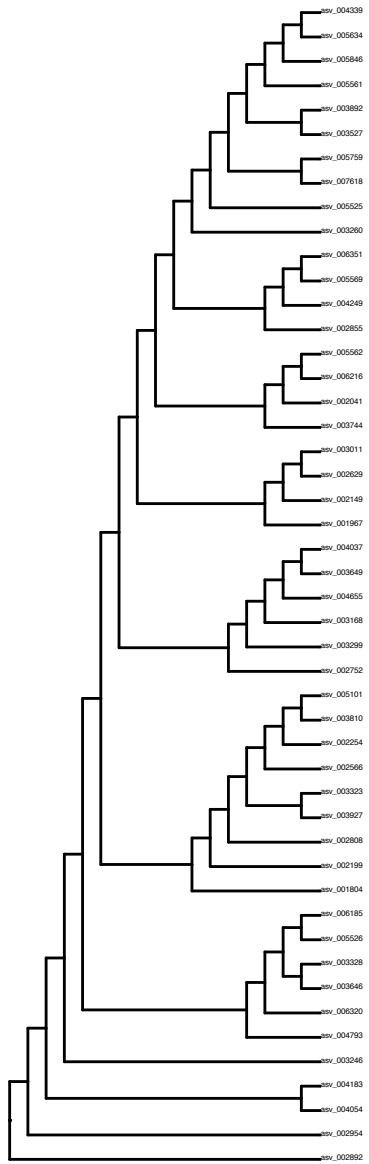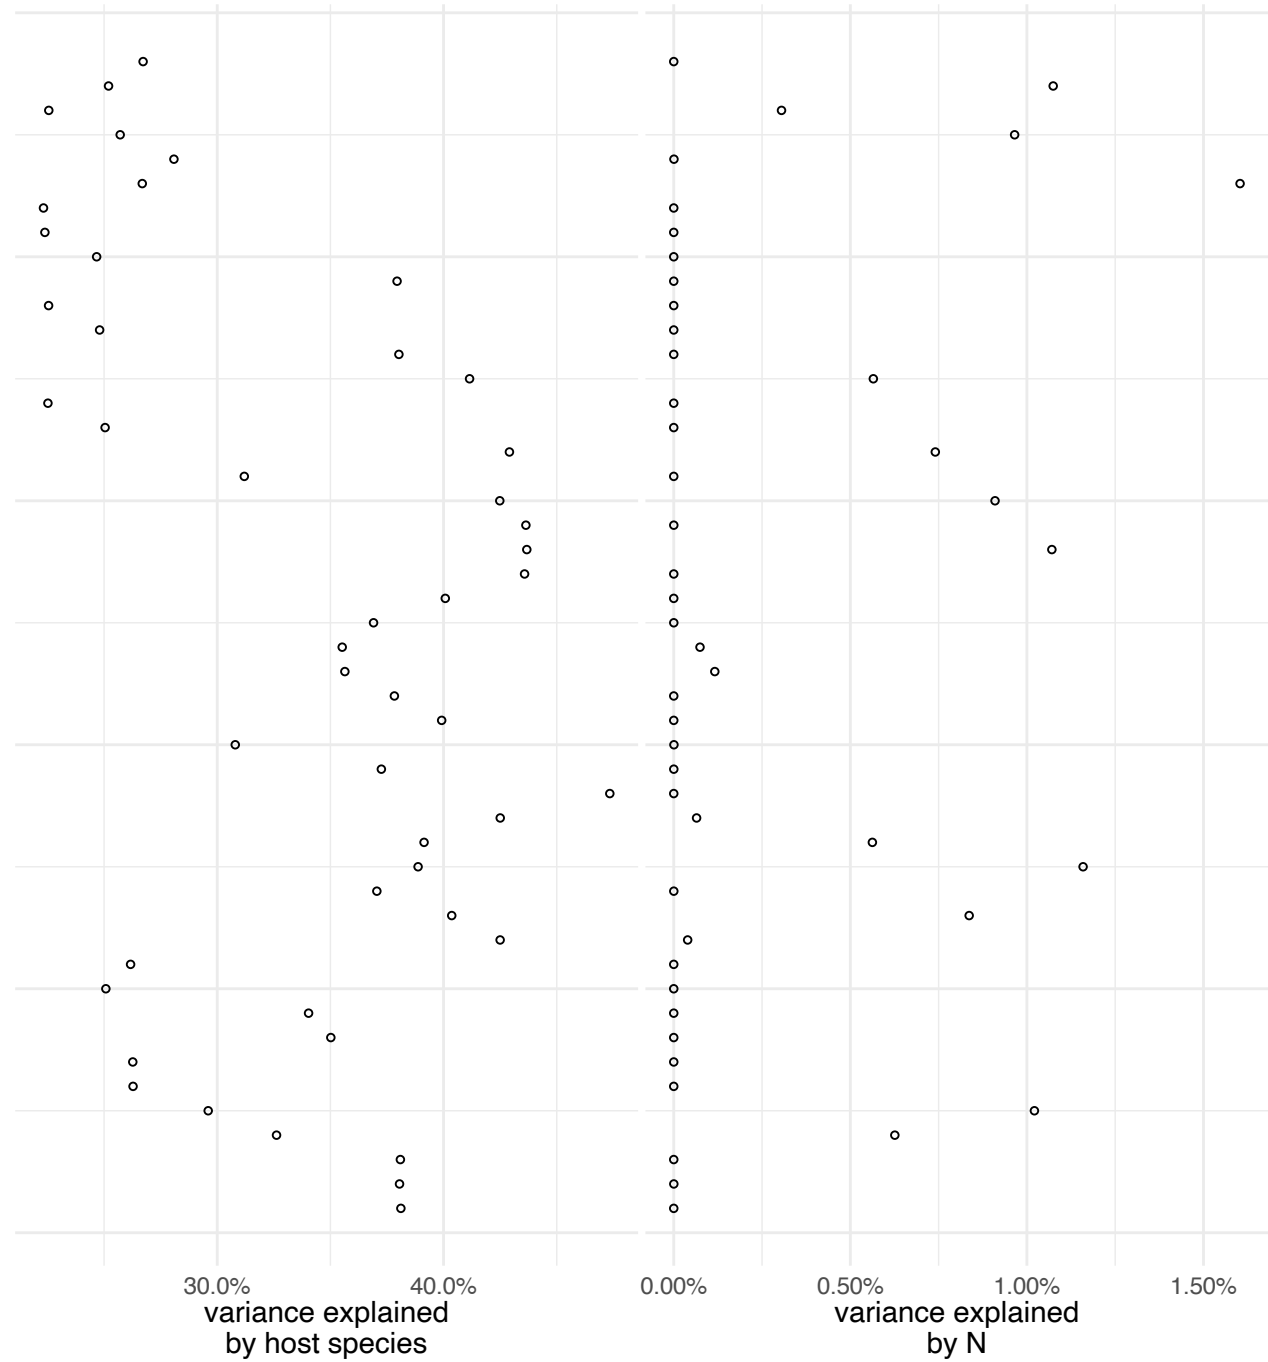

# Nubsella

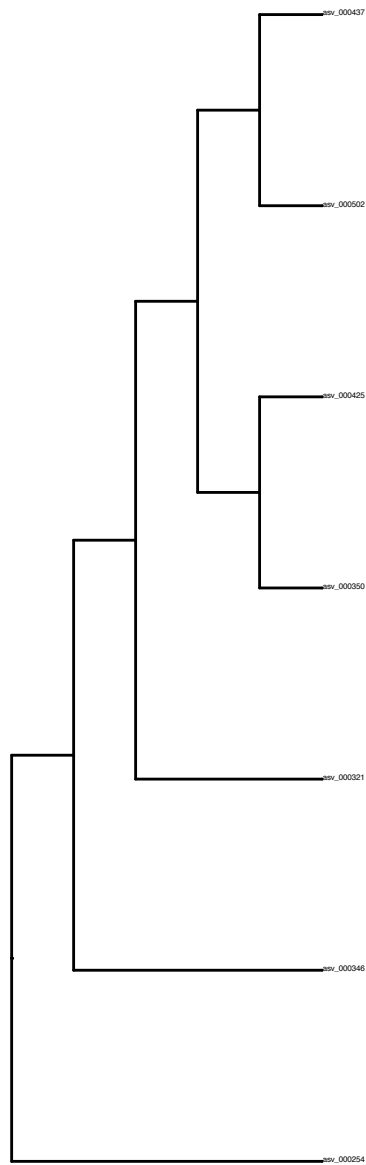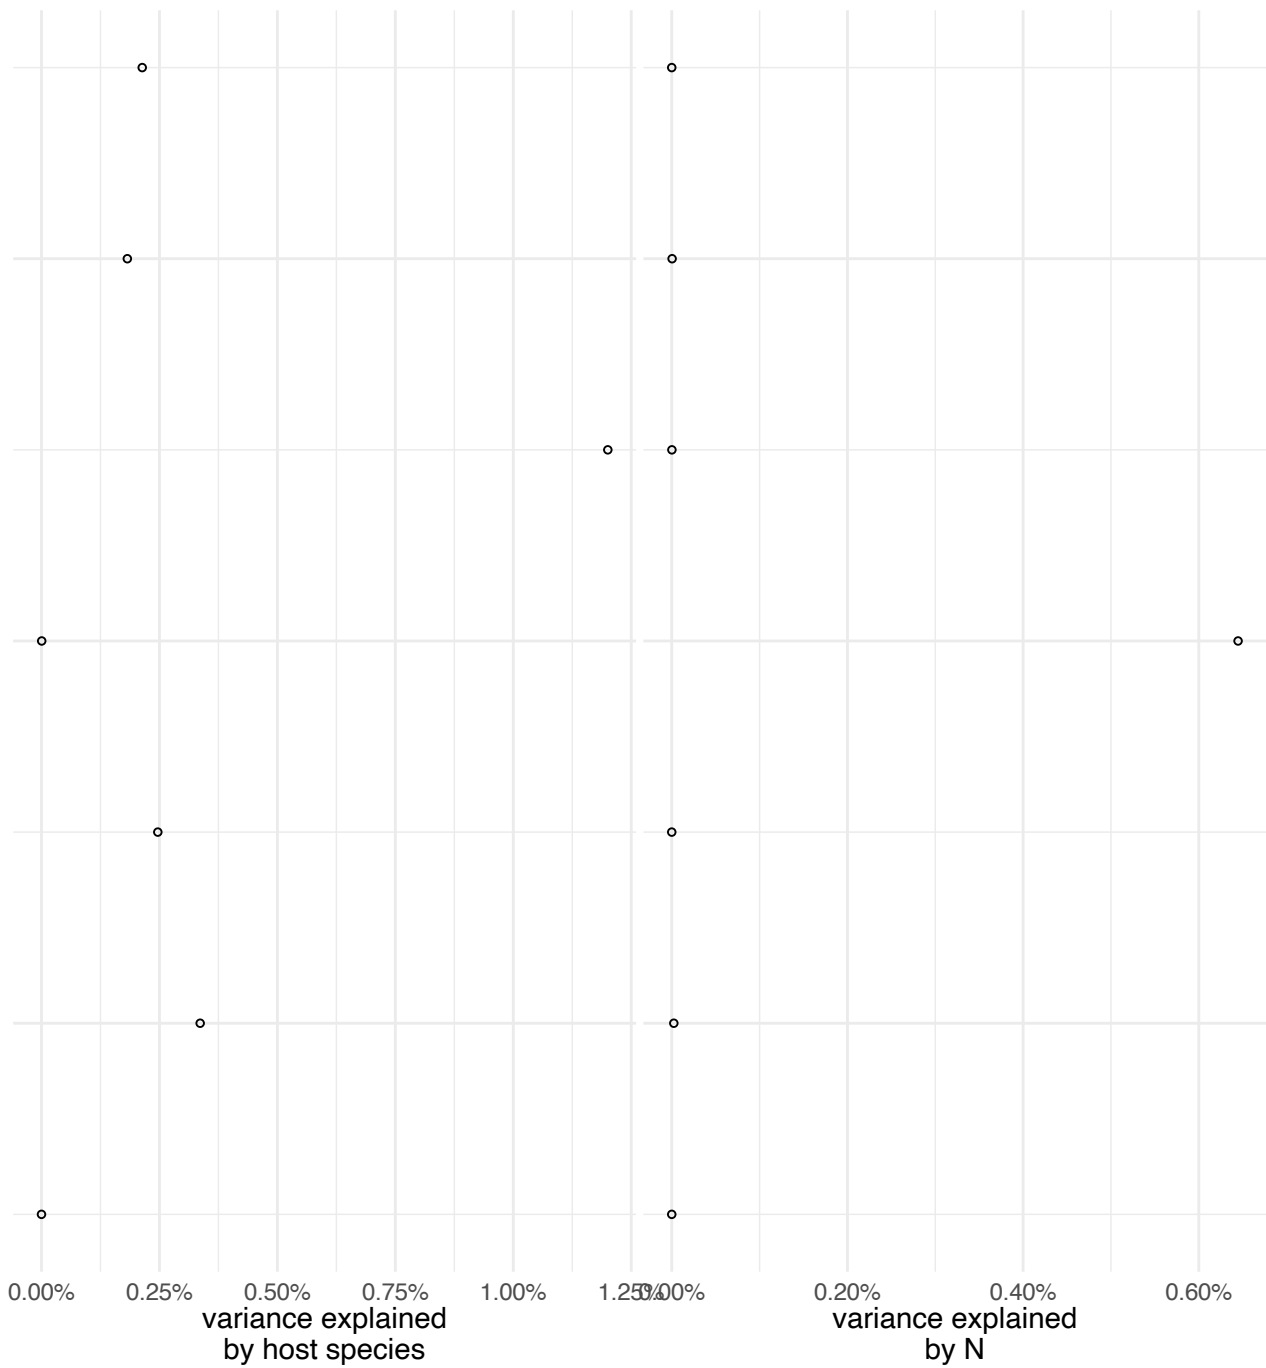

# Phenylobacterium

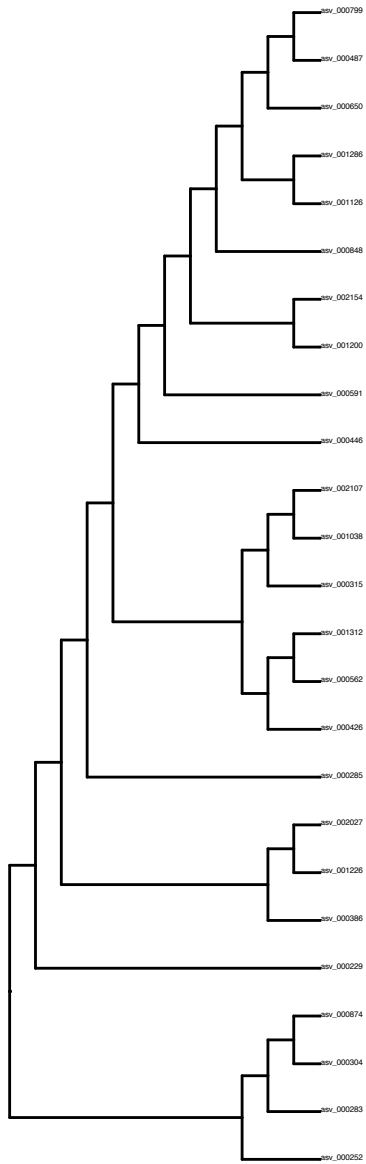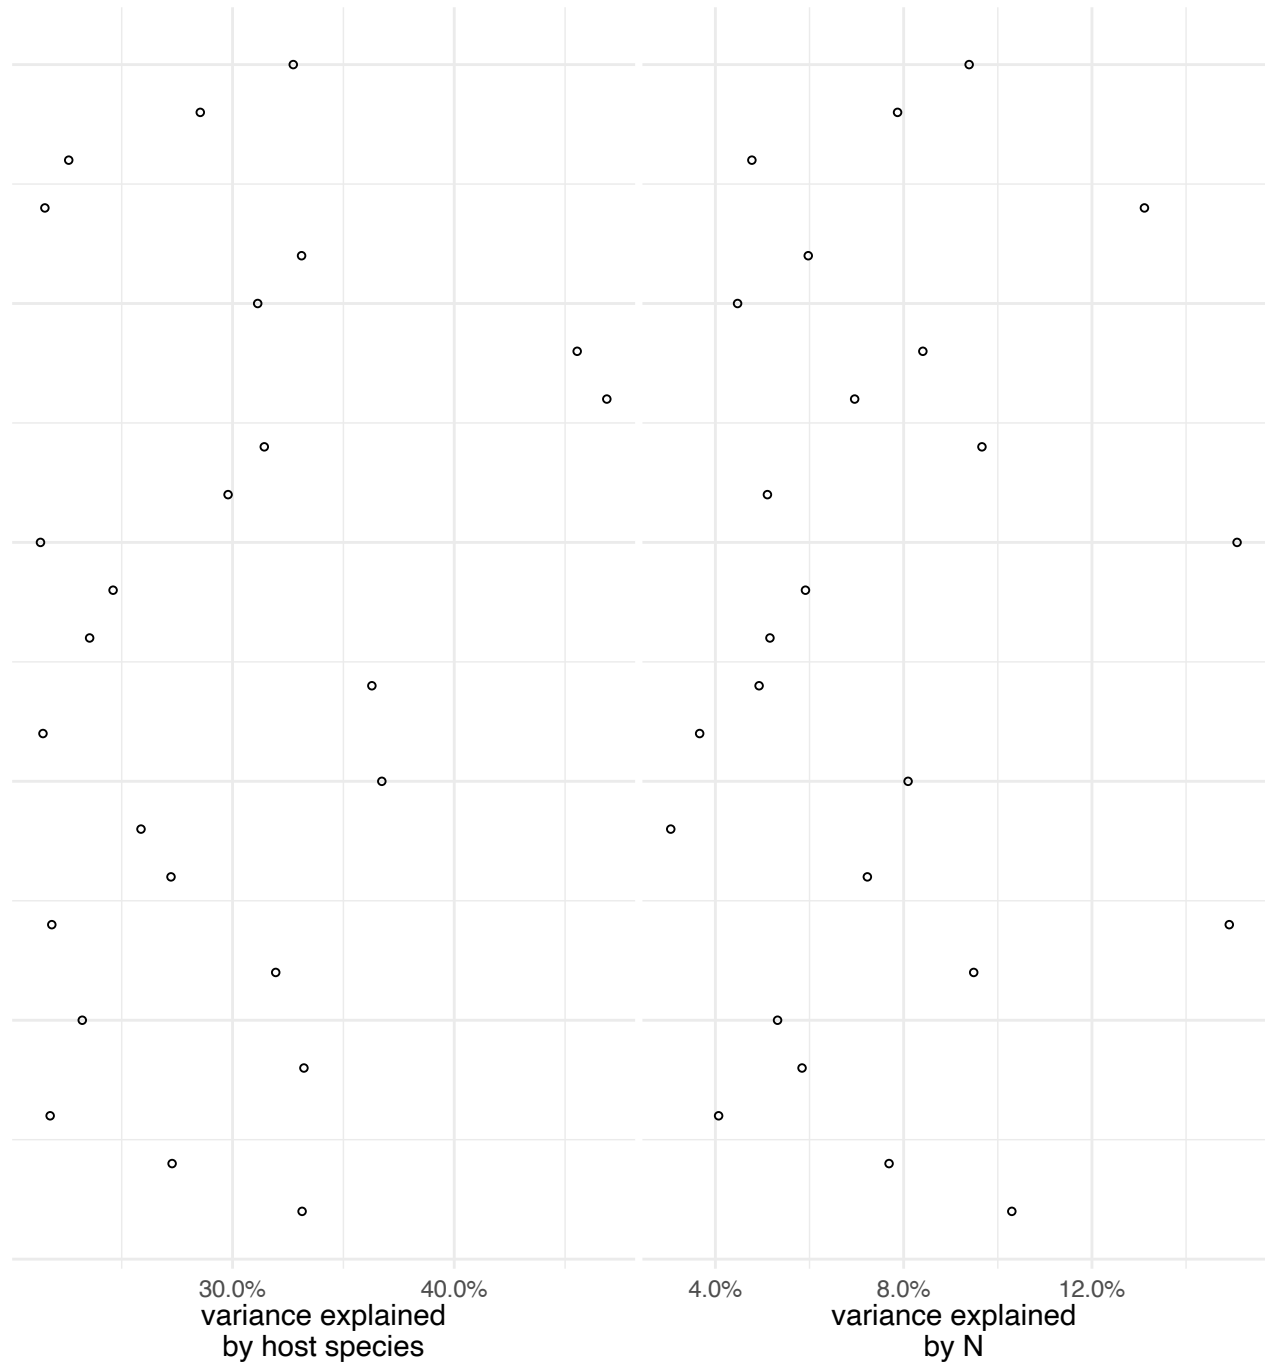



# Phyllobacterium

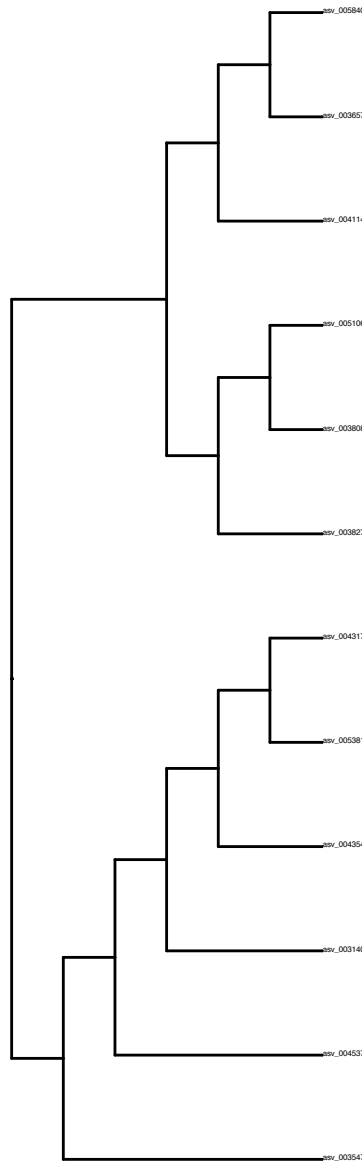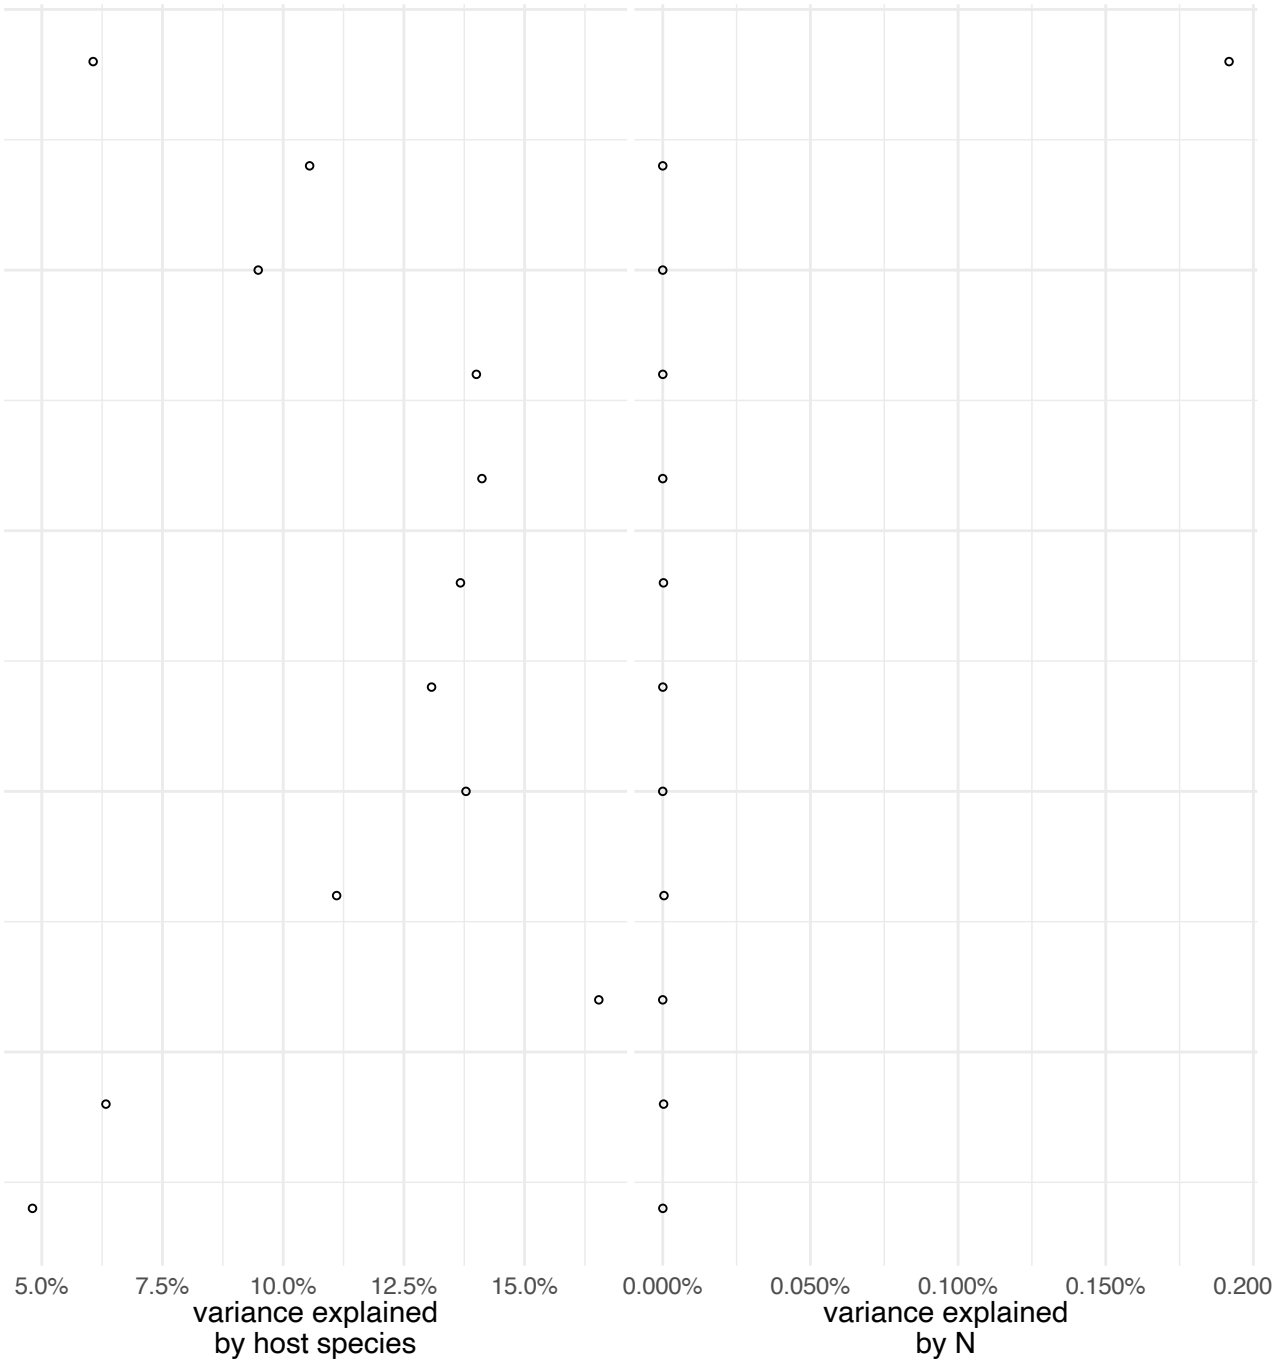

# Piscinibacter

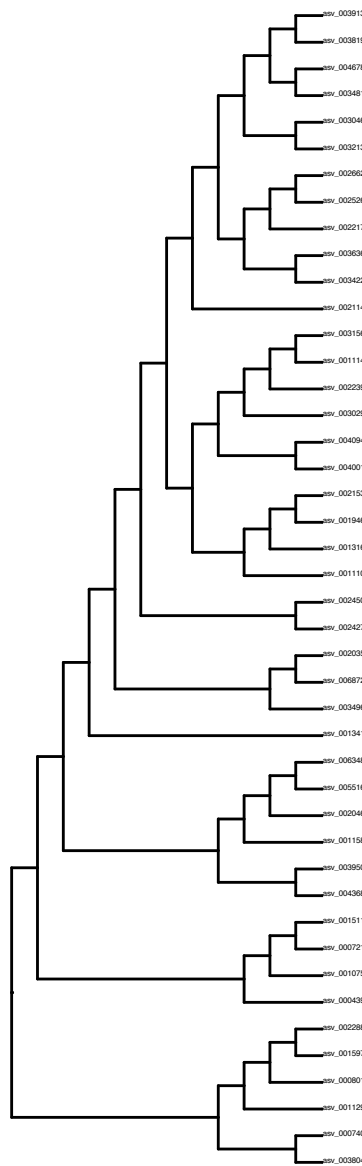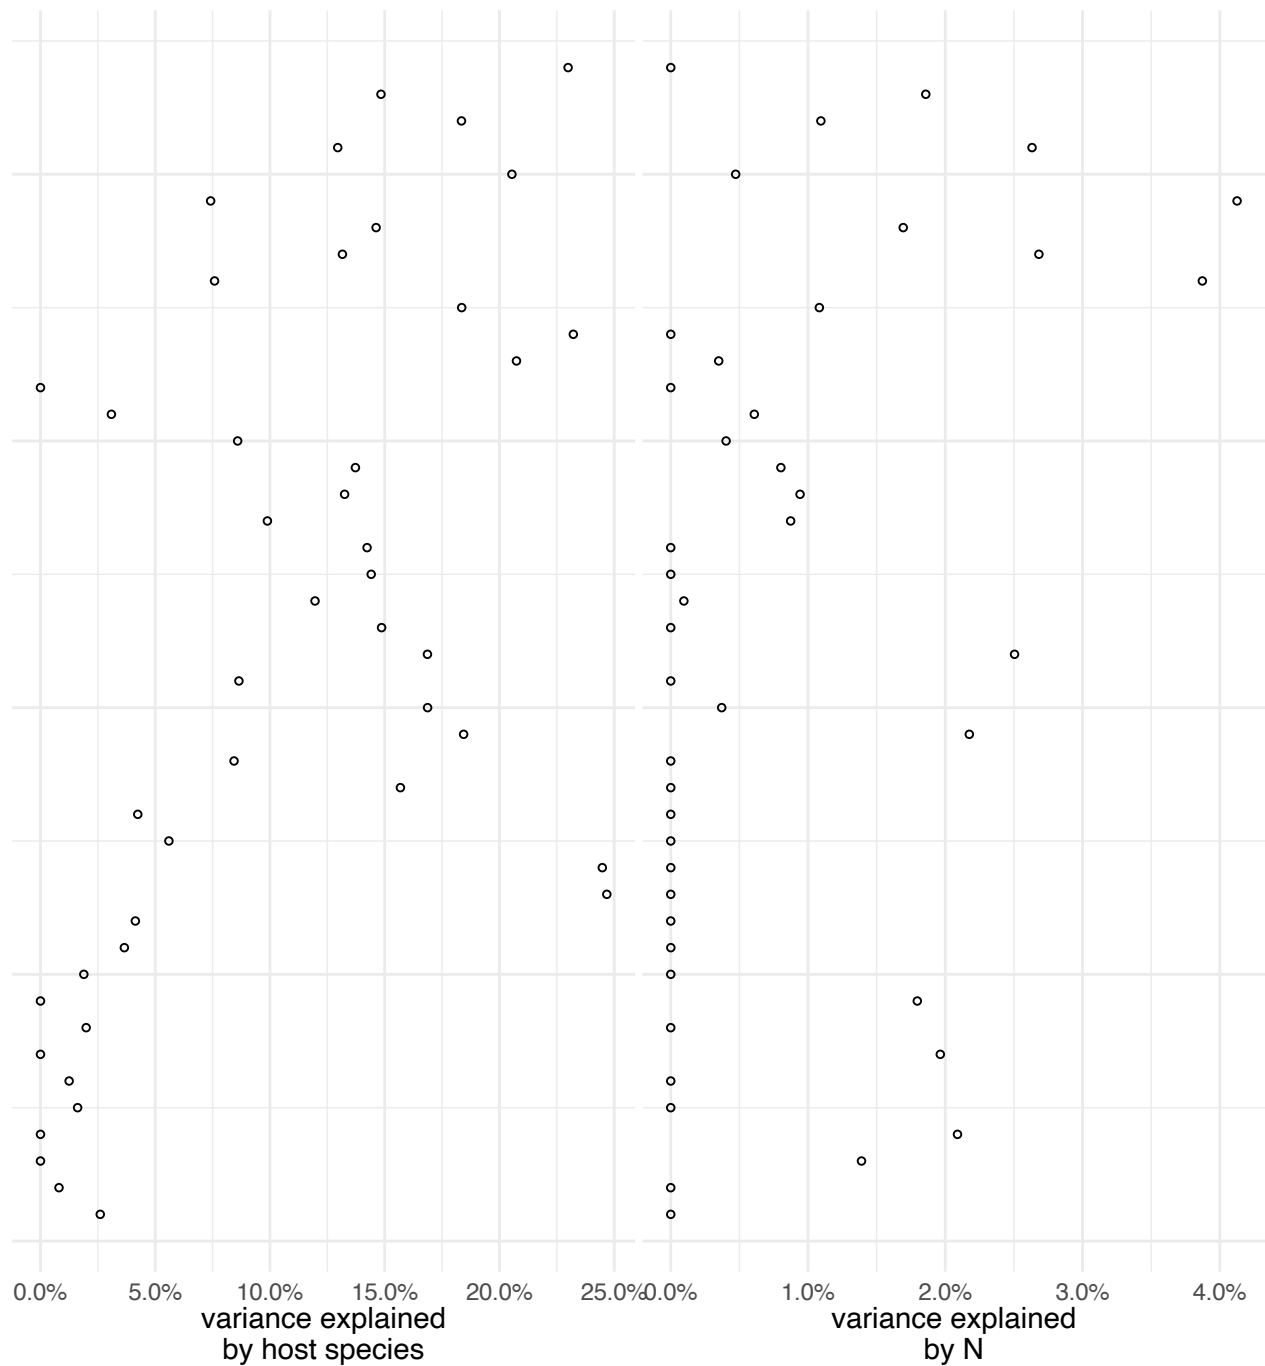

# Povalibacter

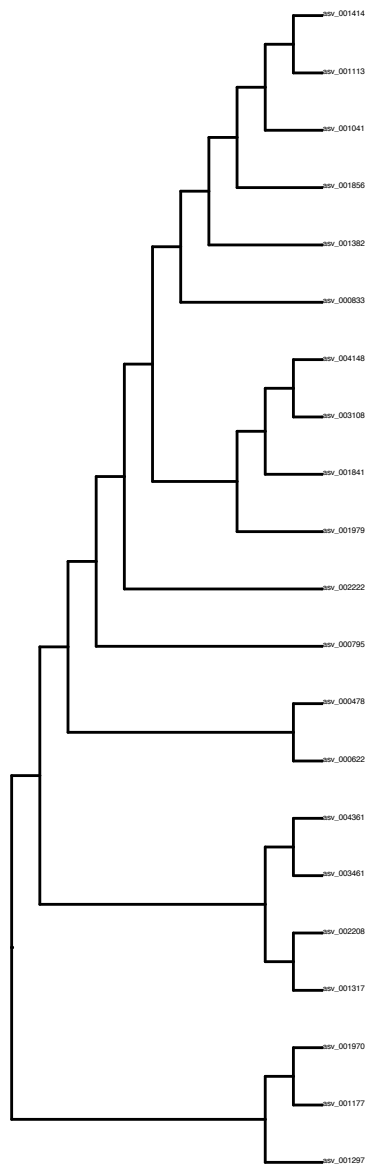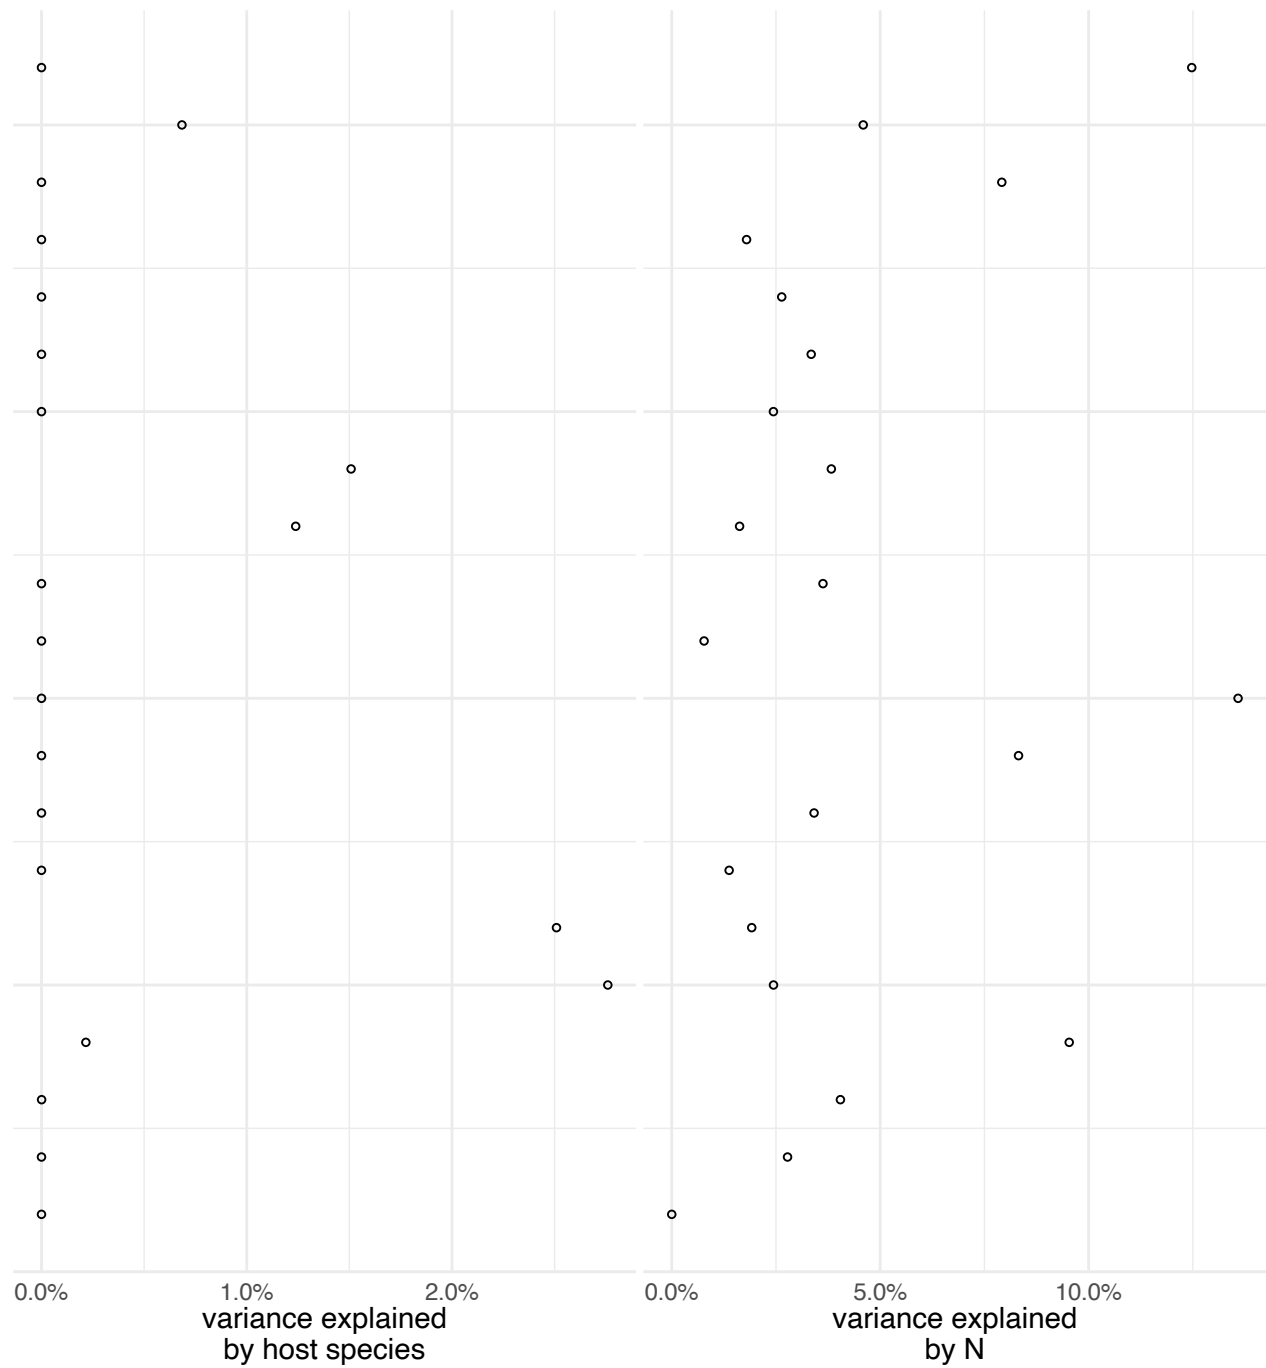

# Pseudarthrobacter

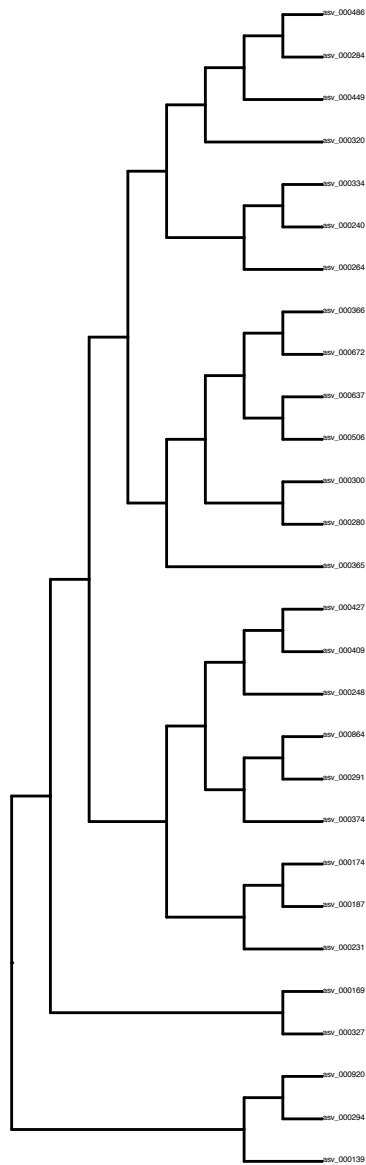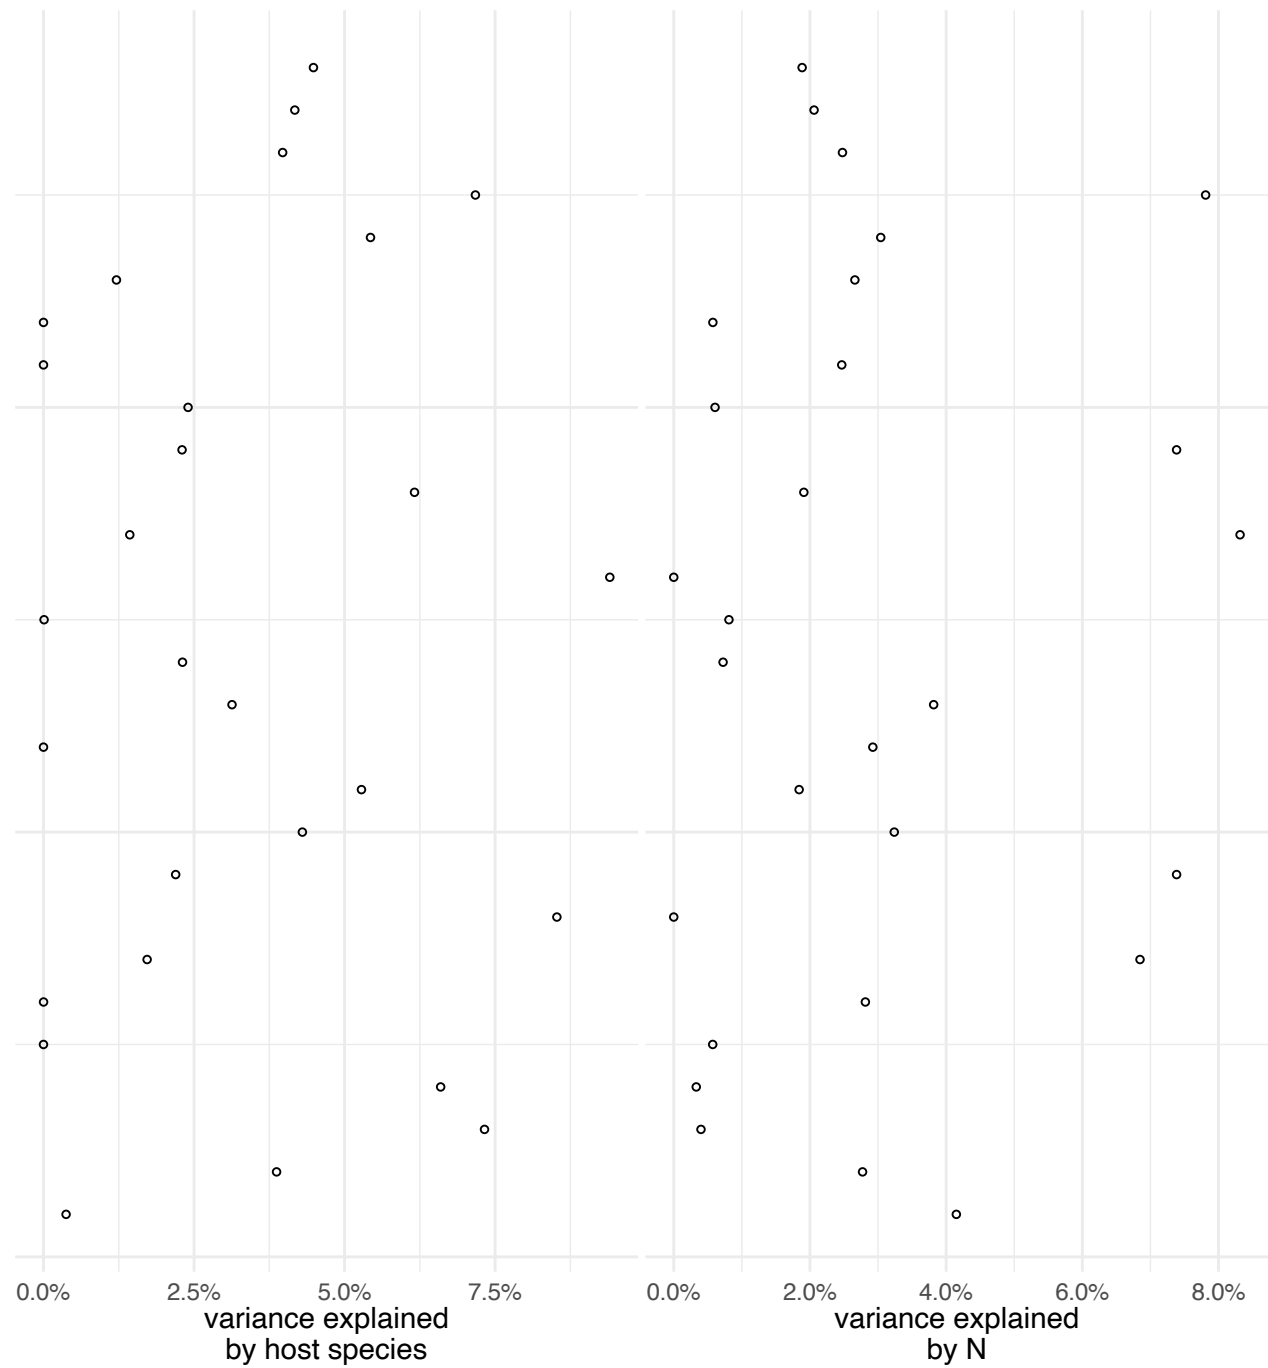

# Pseudoduganella

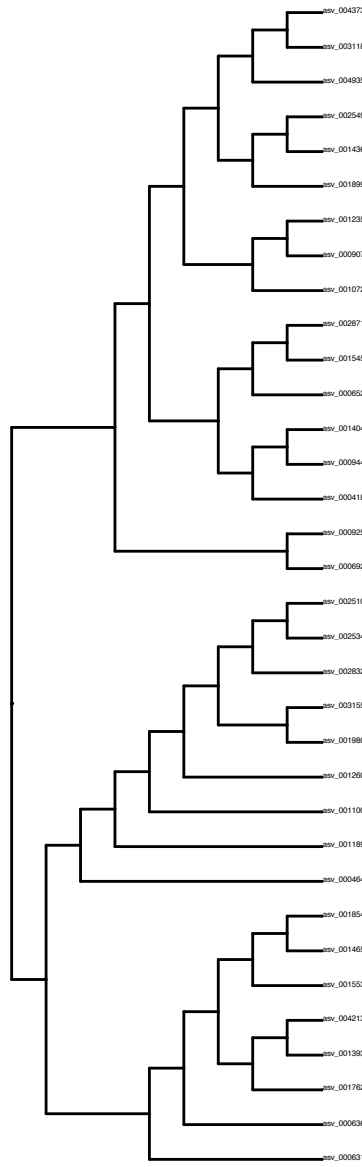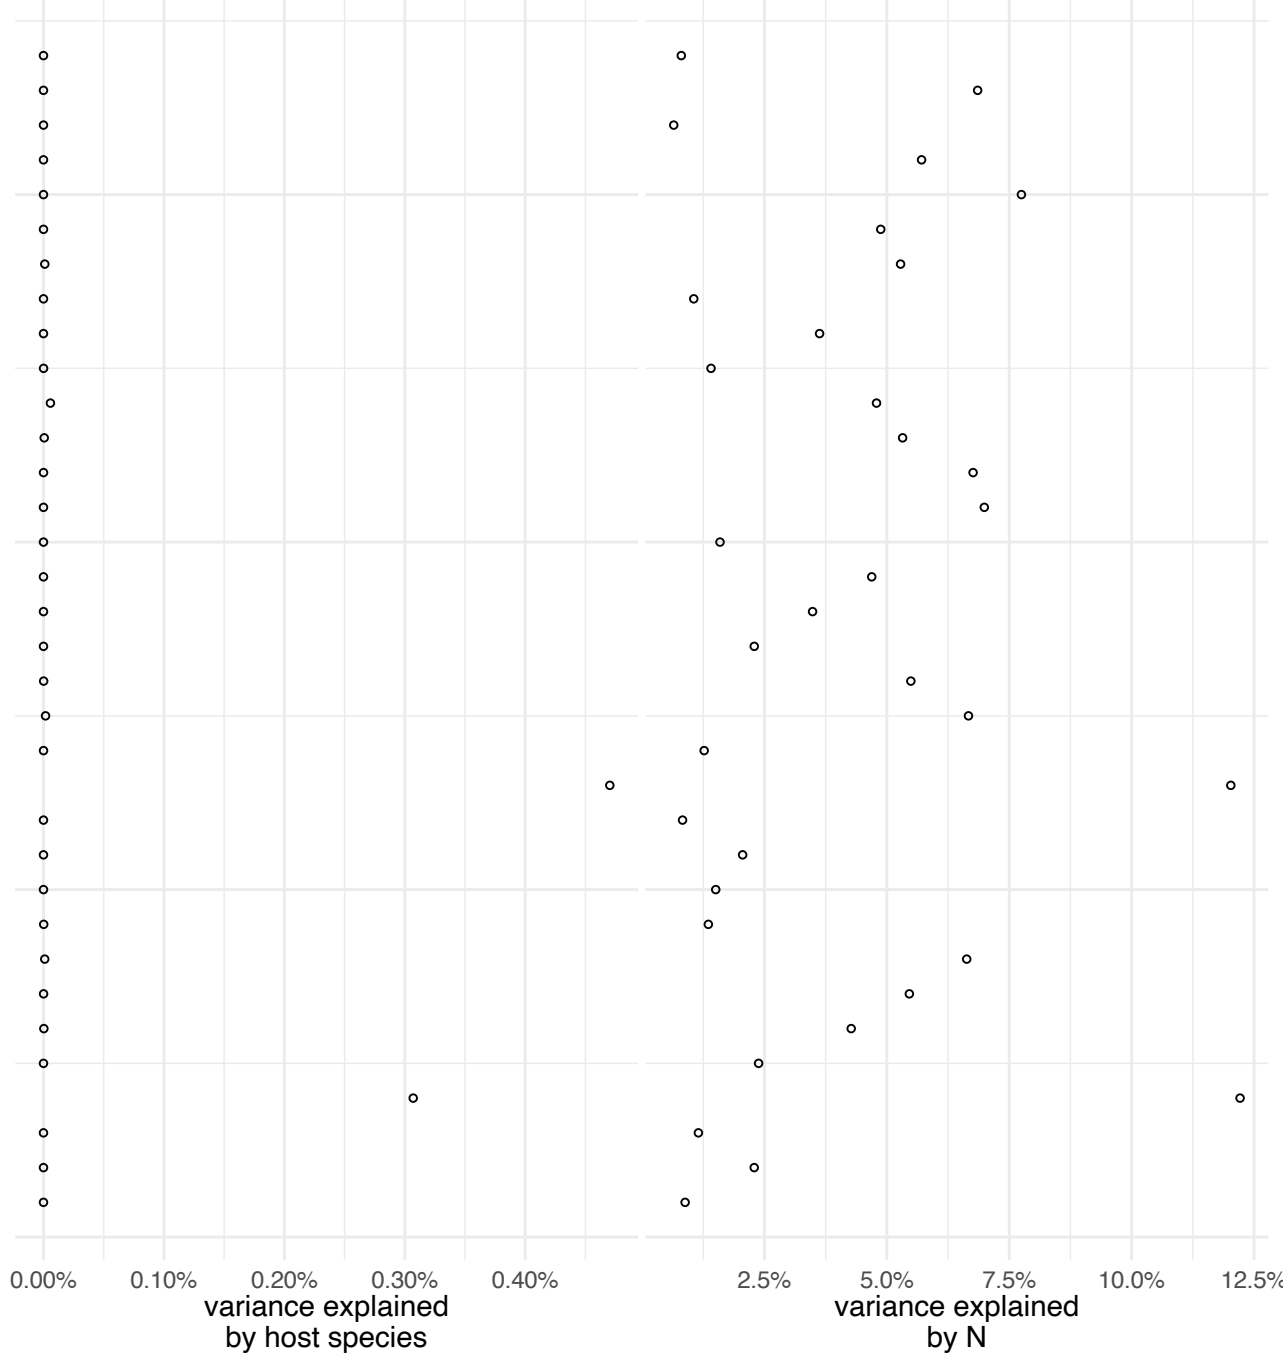

# Pseudonocardia

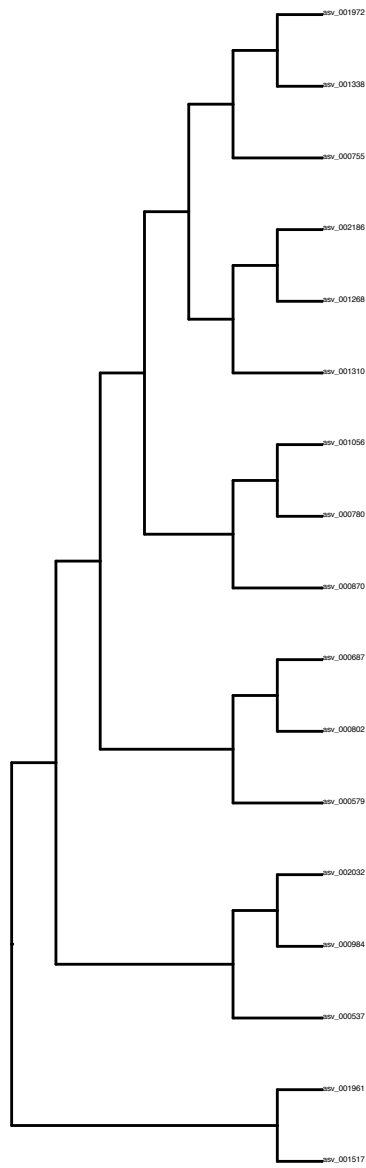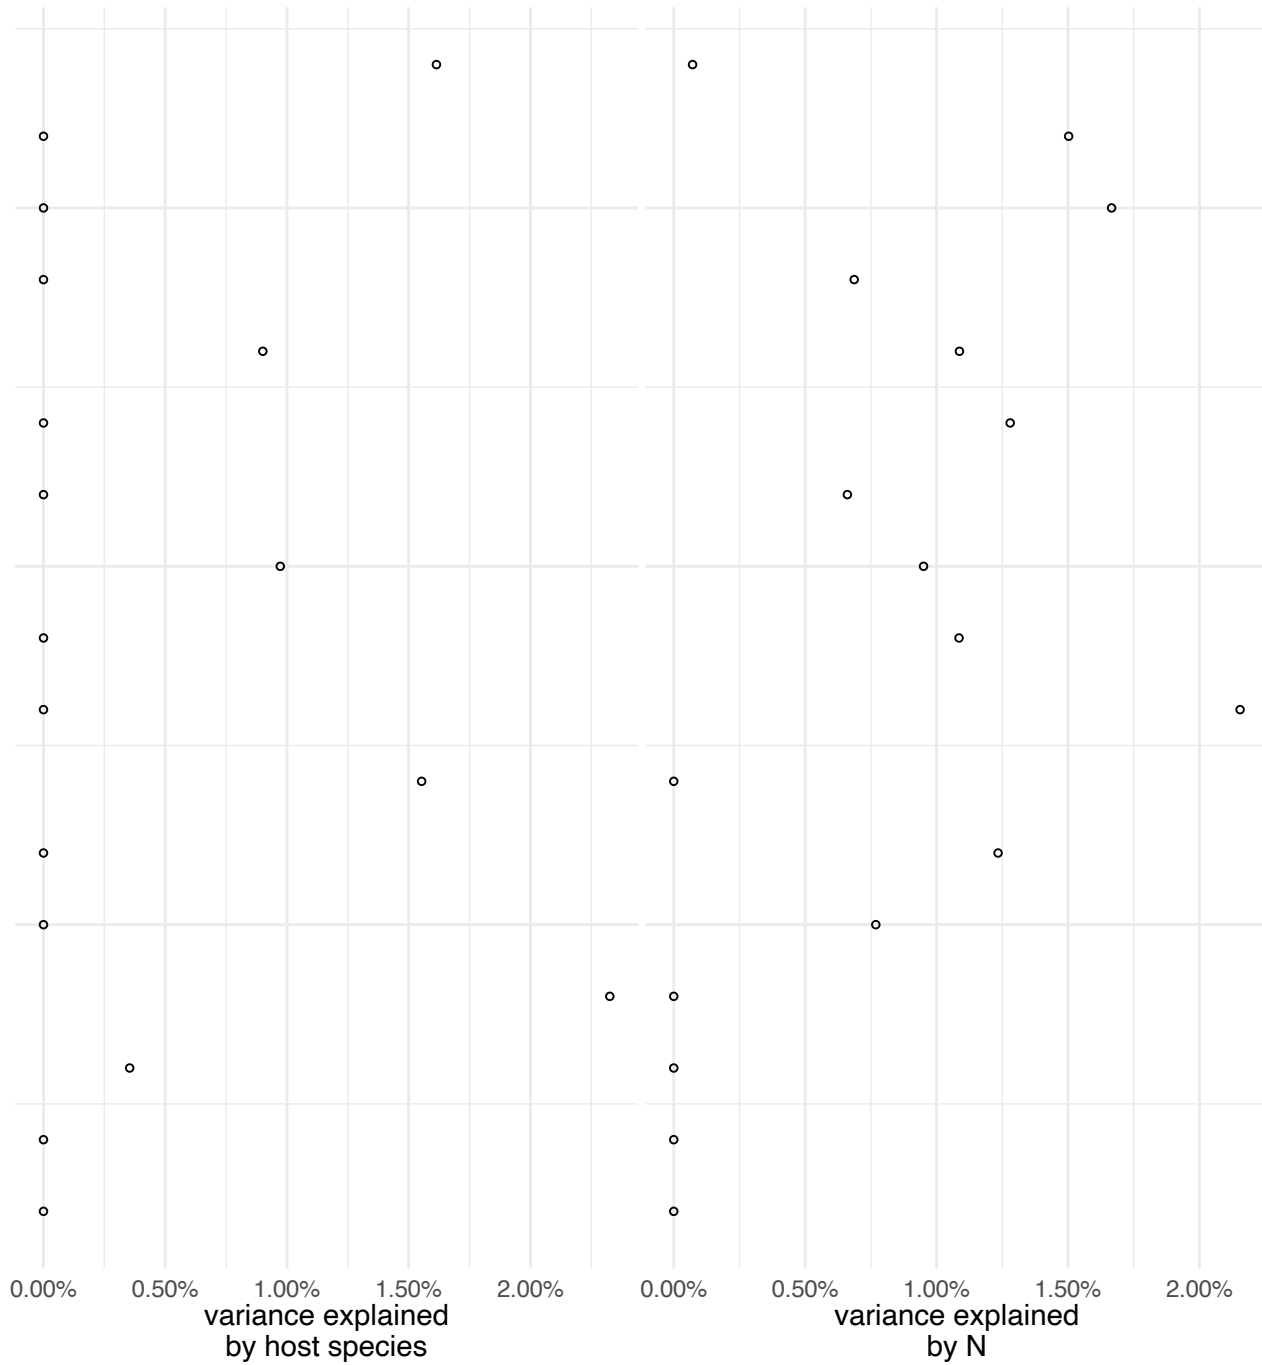

# Psychroglaciecola

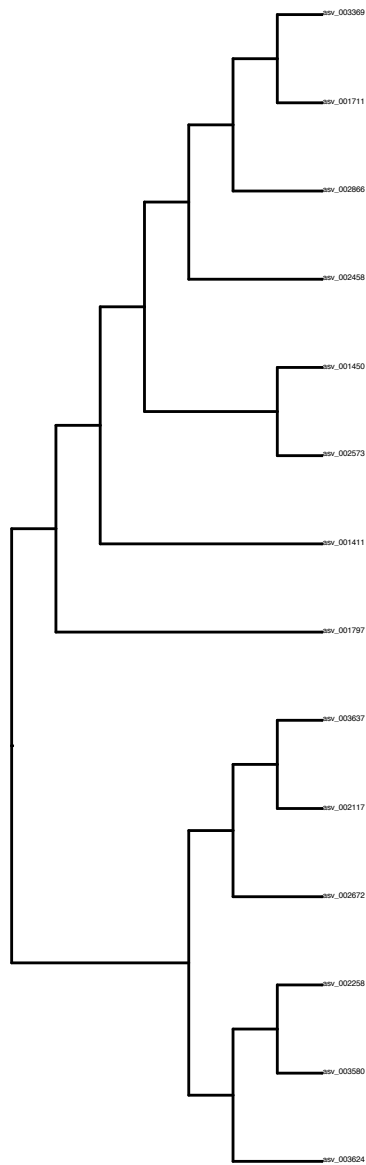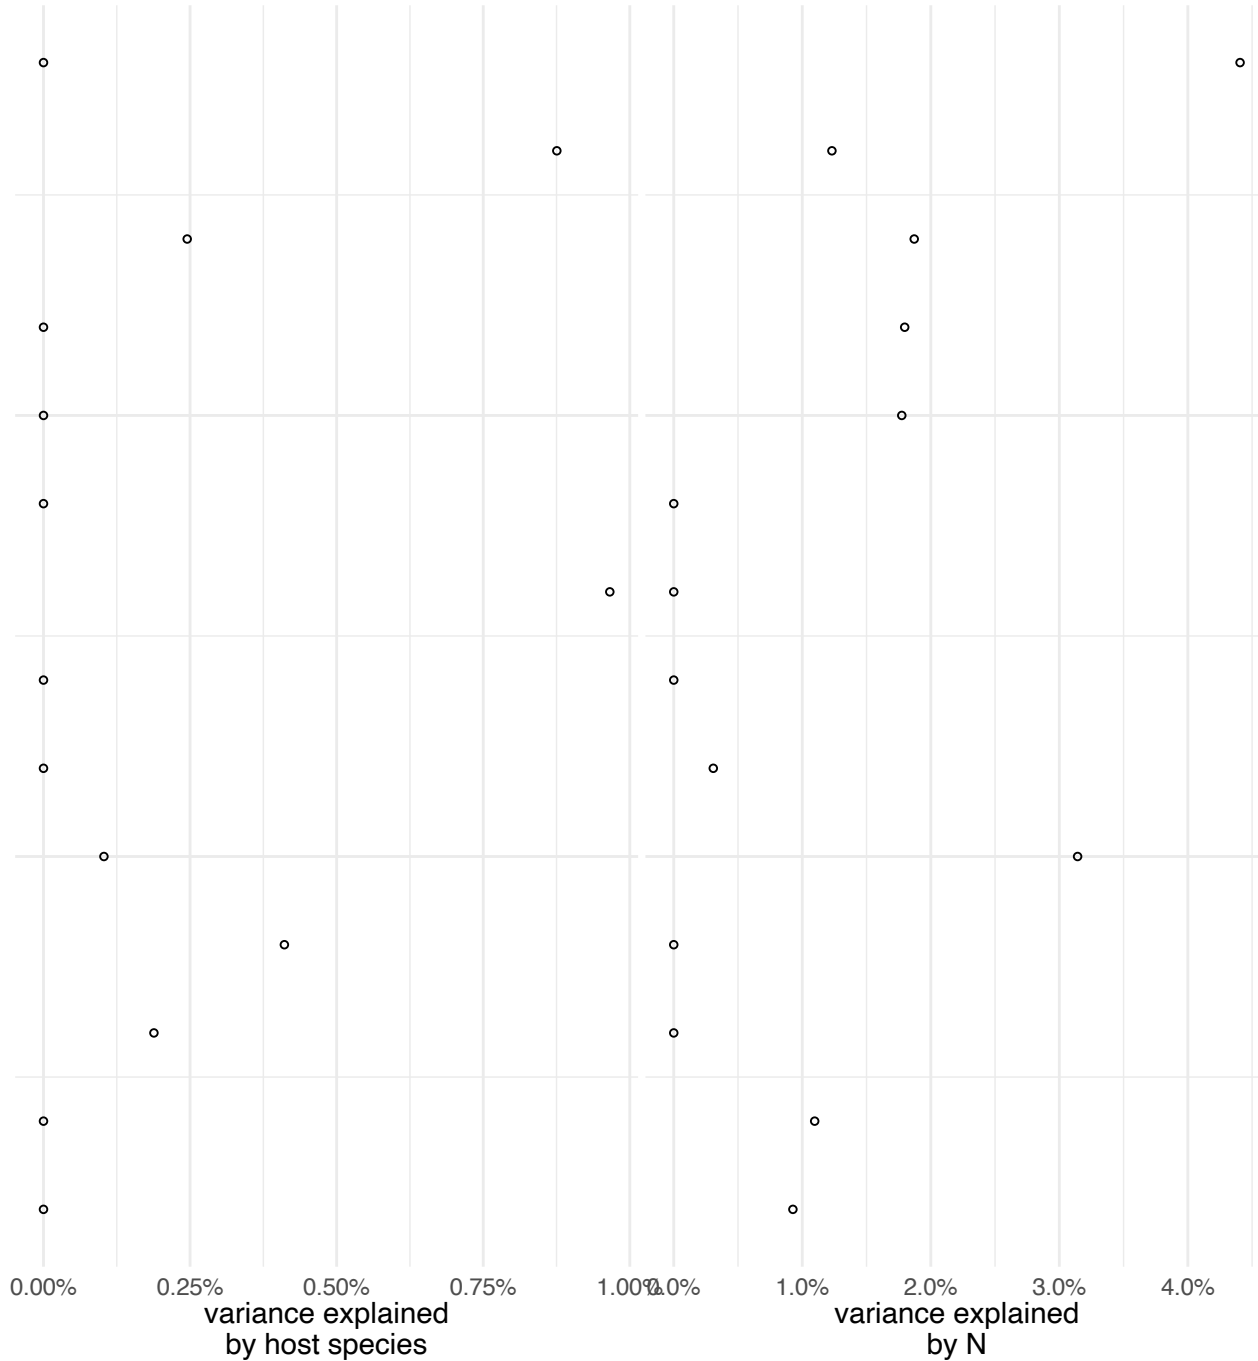





# Reyranella

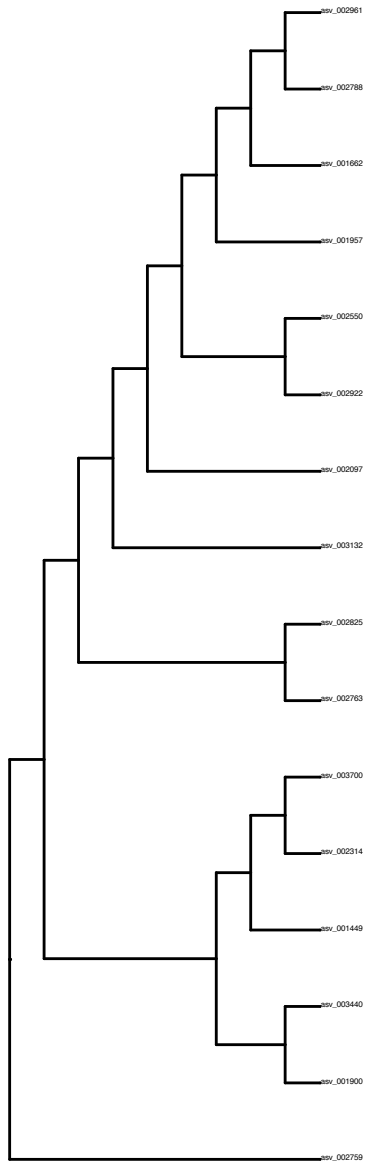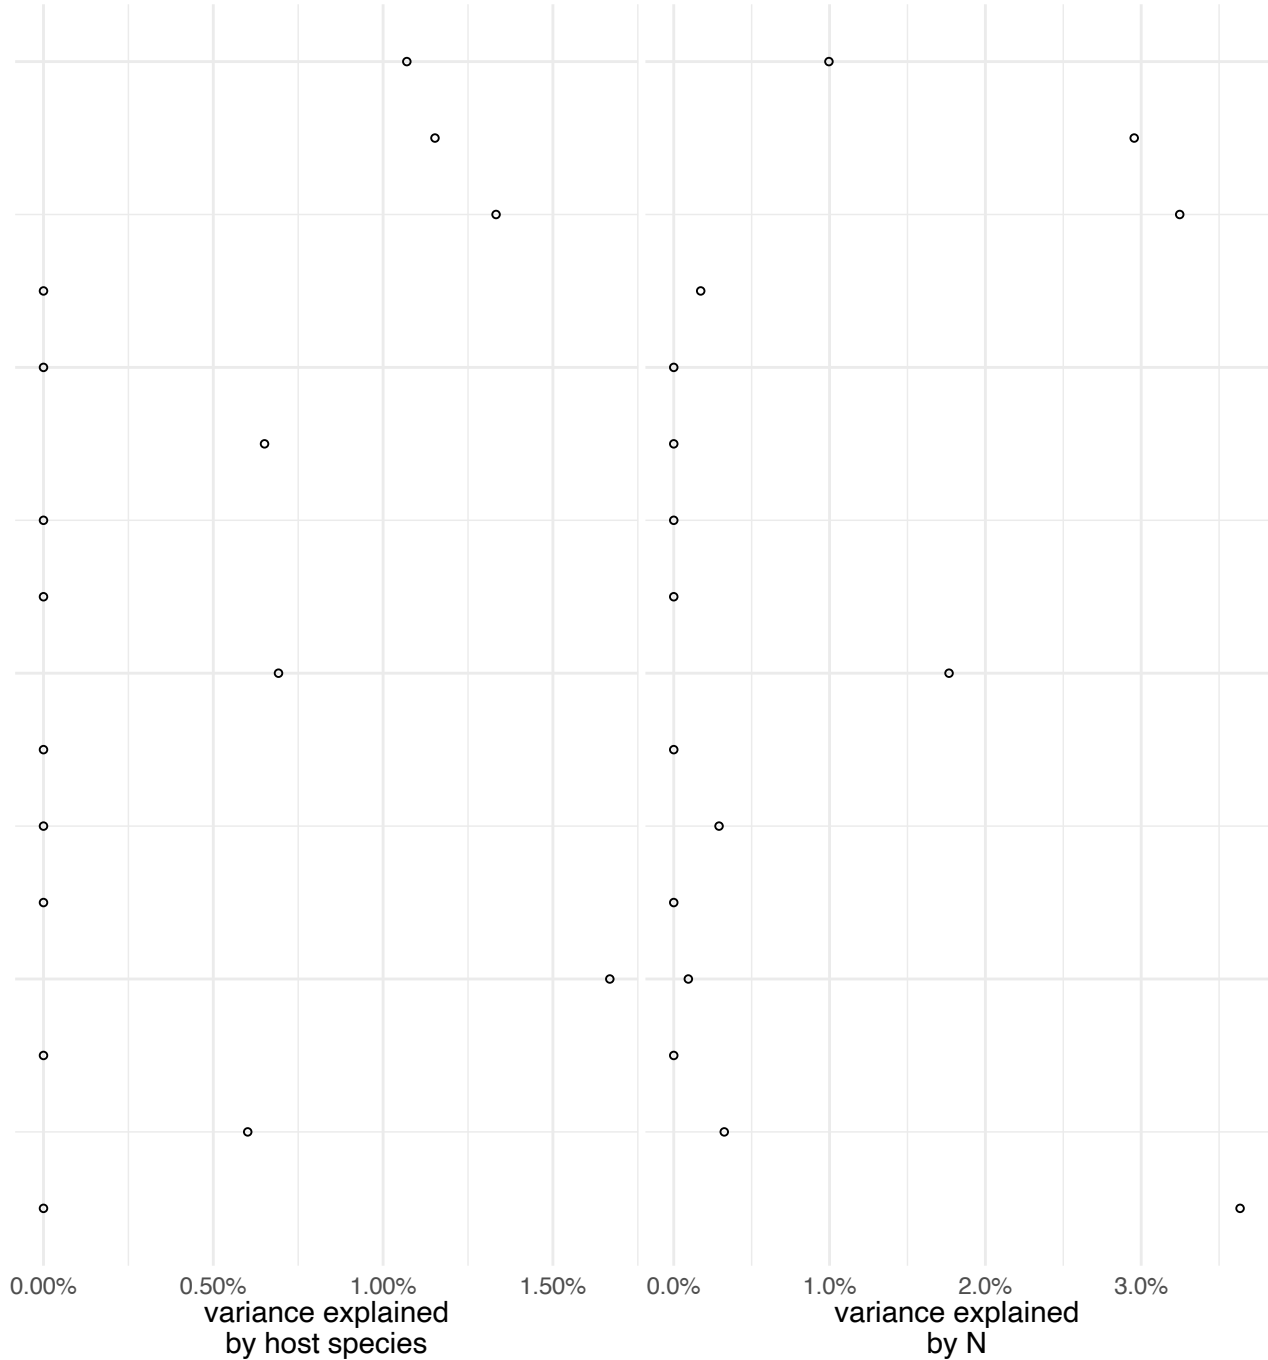

# Rhizobium

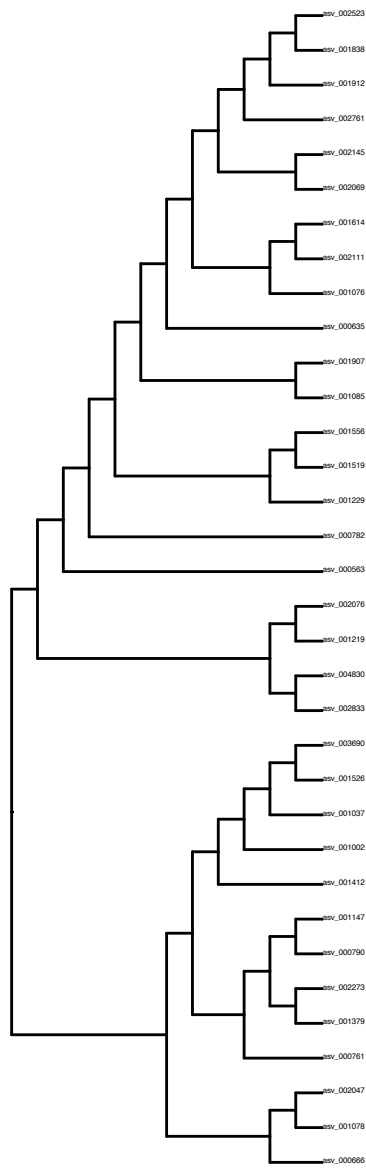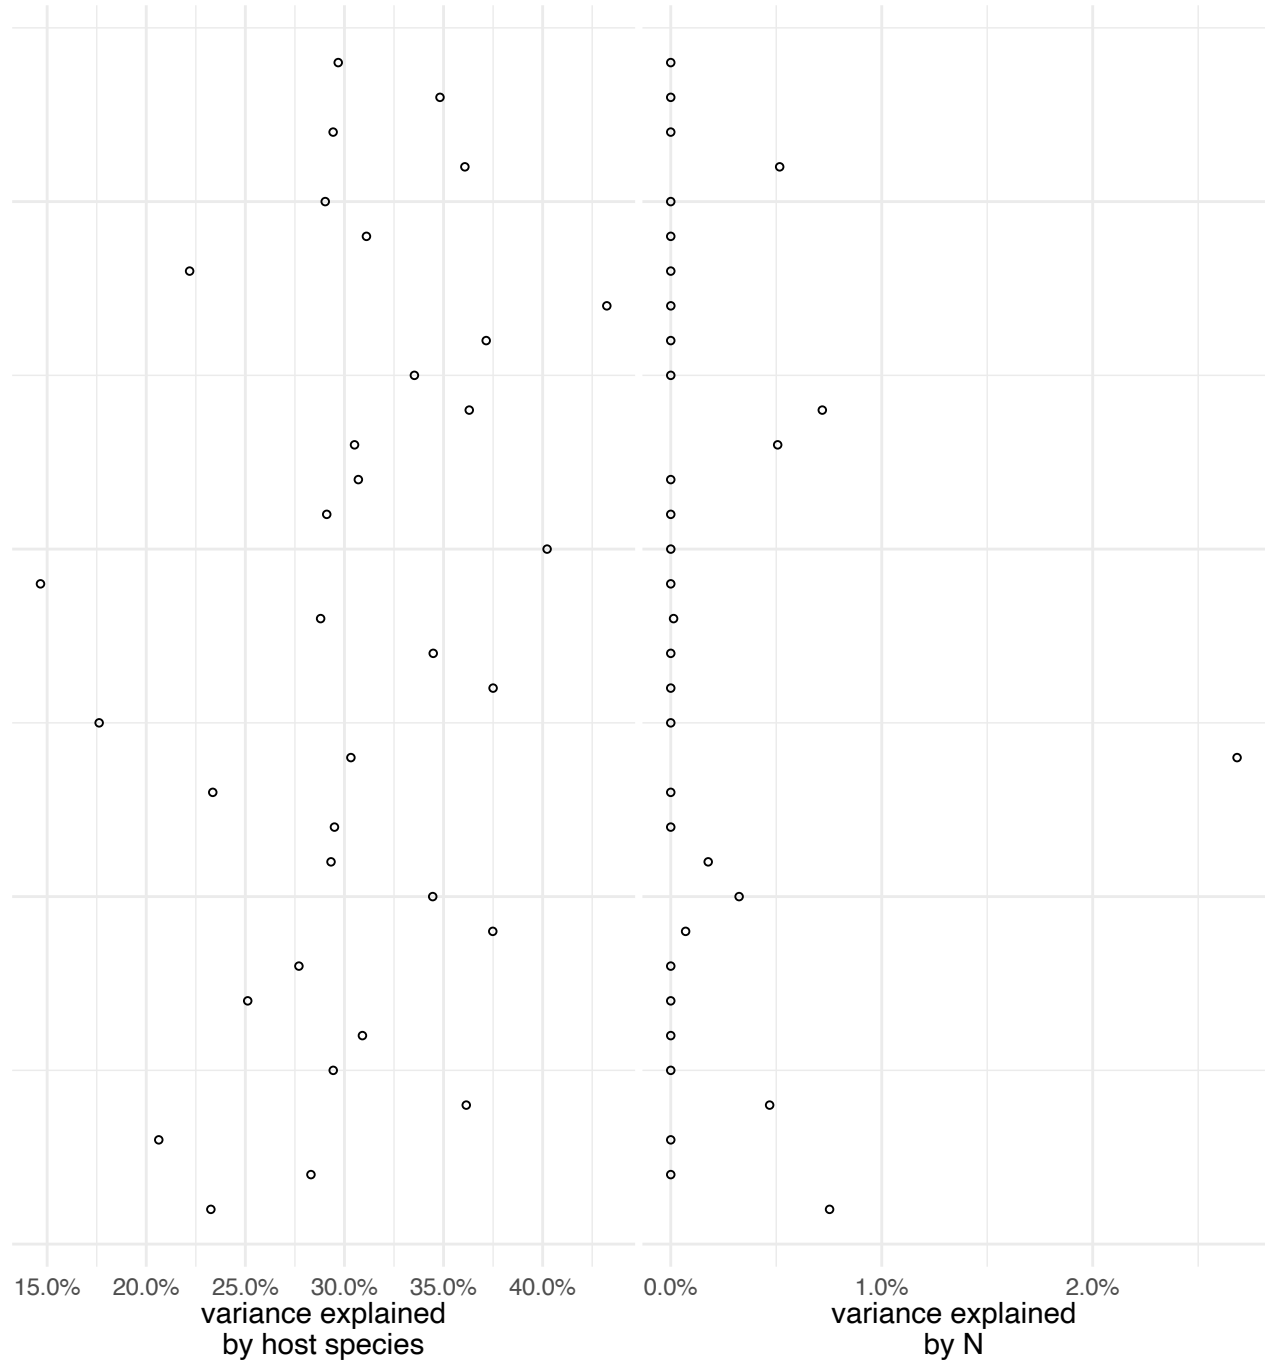

# Rudaea

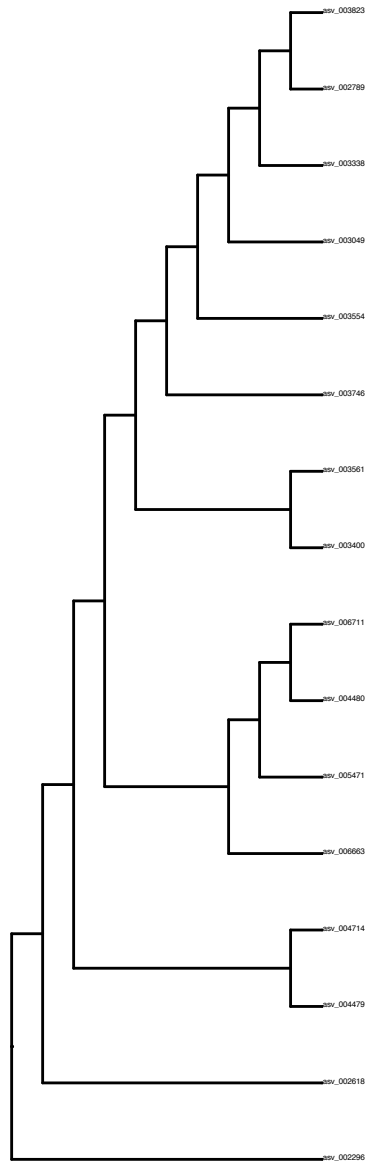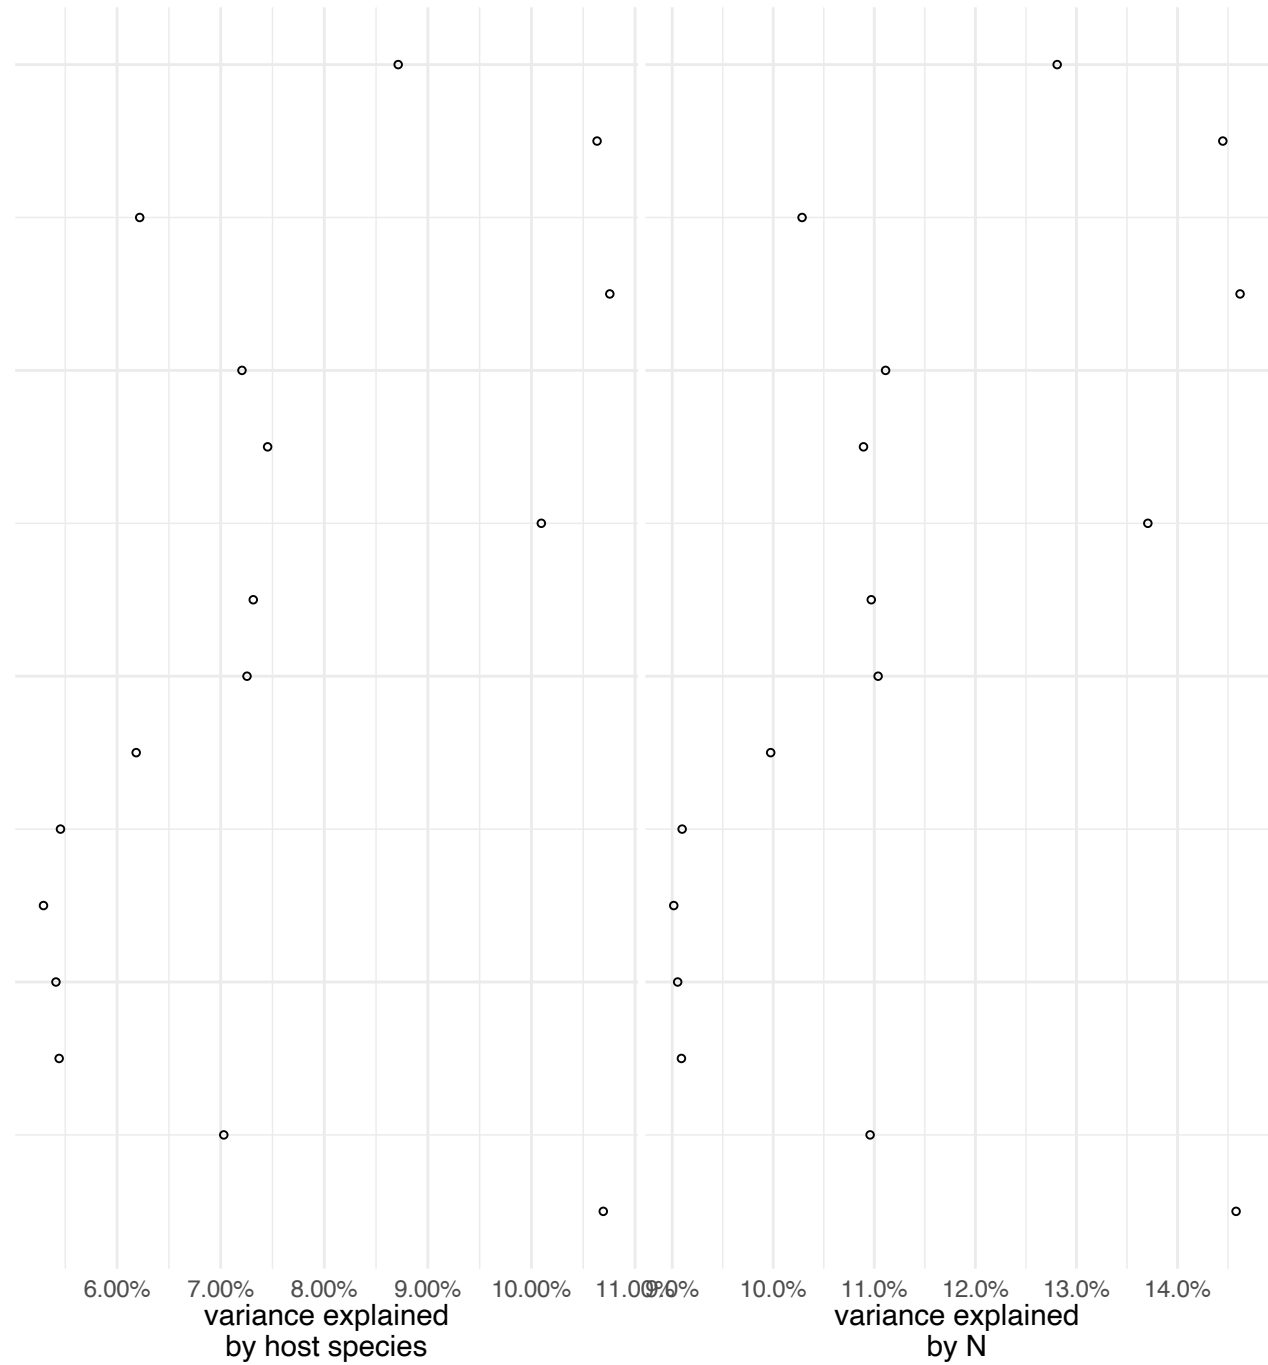

# Skermanella

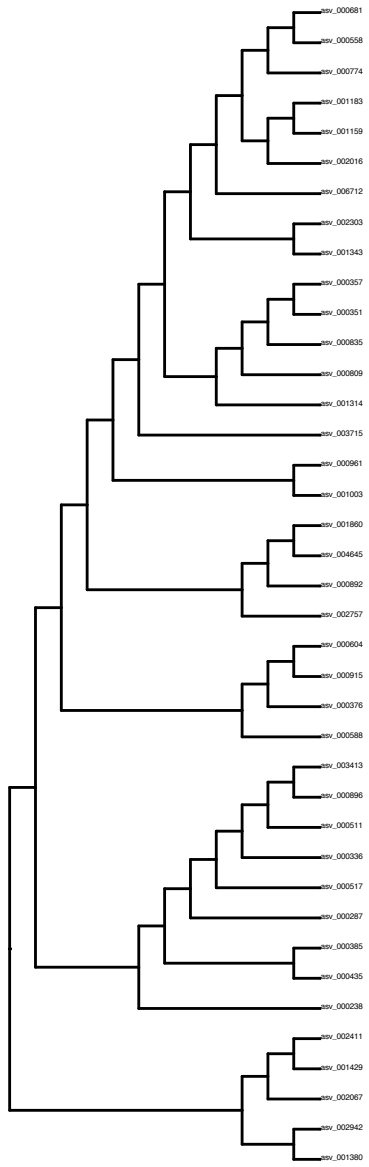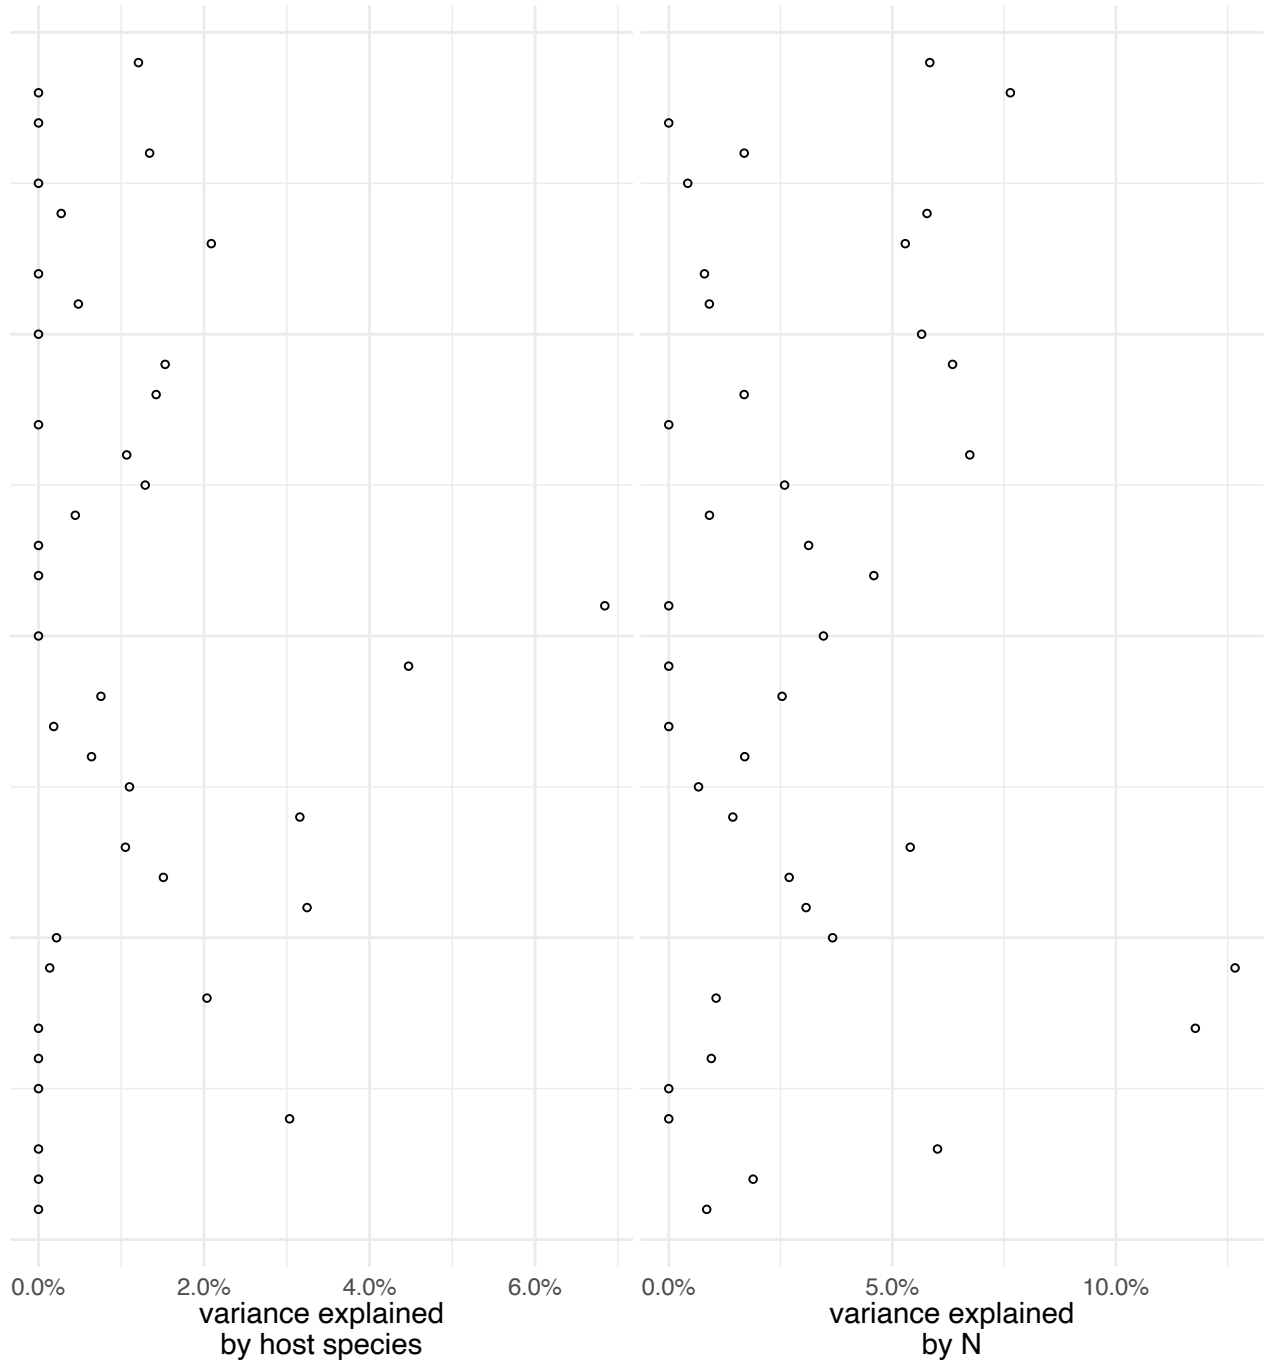

# Stenotrophomonas

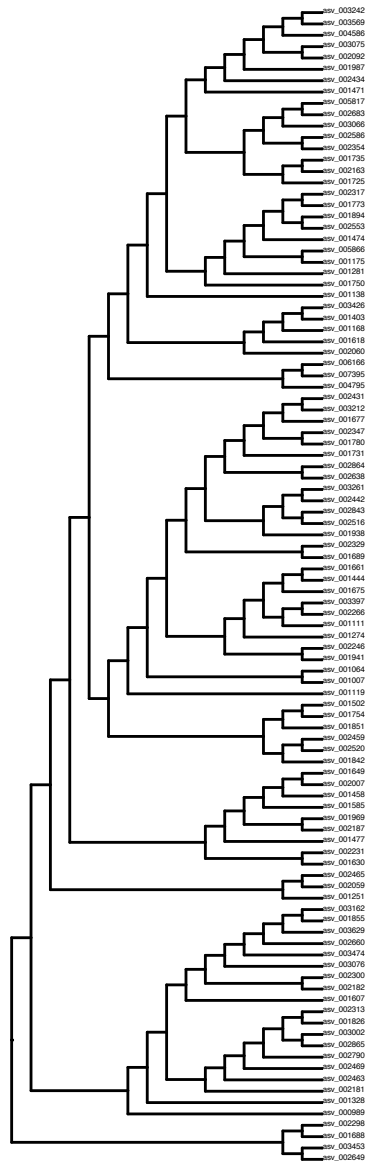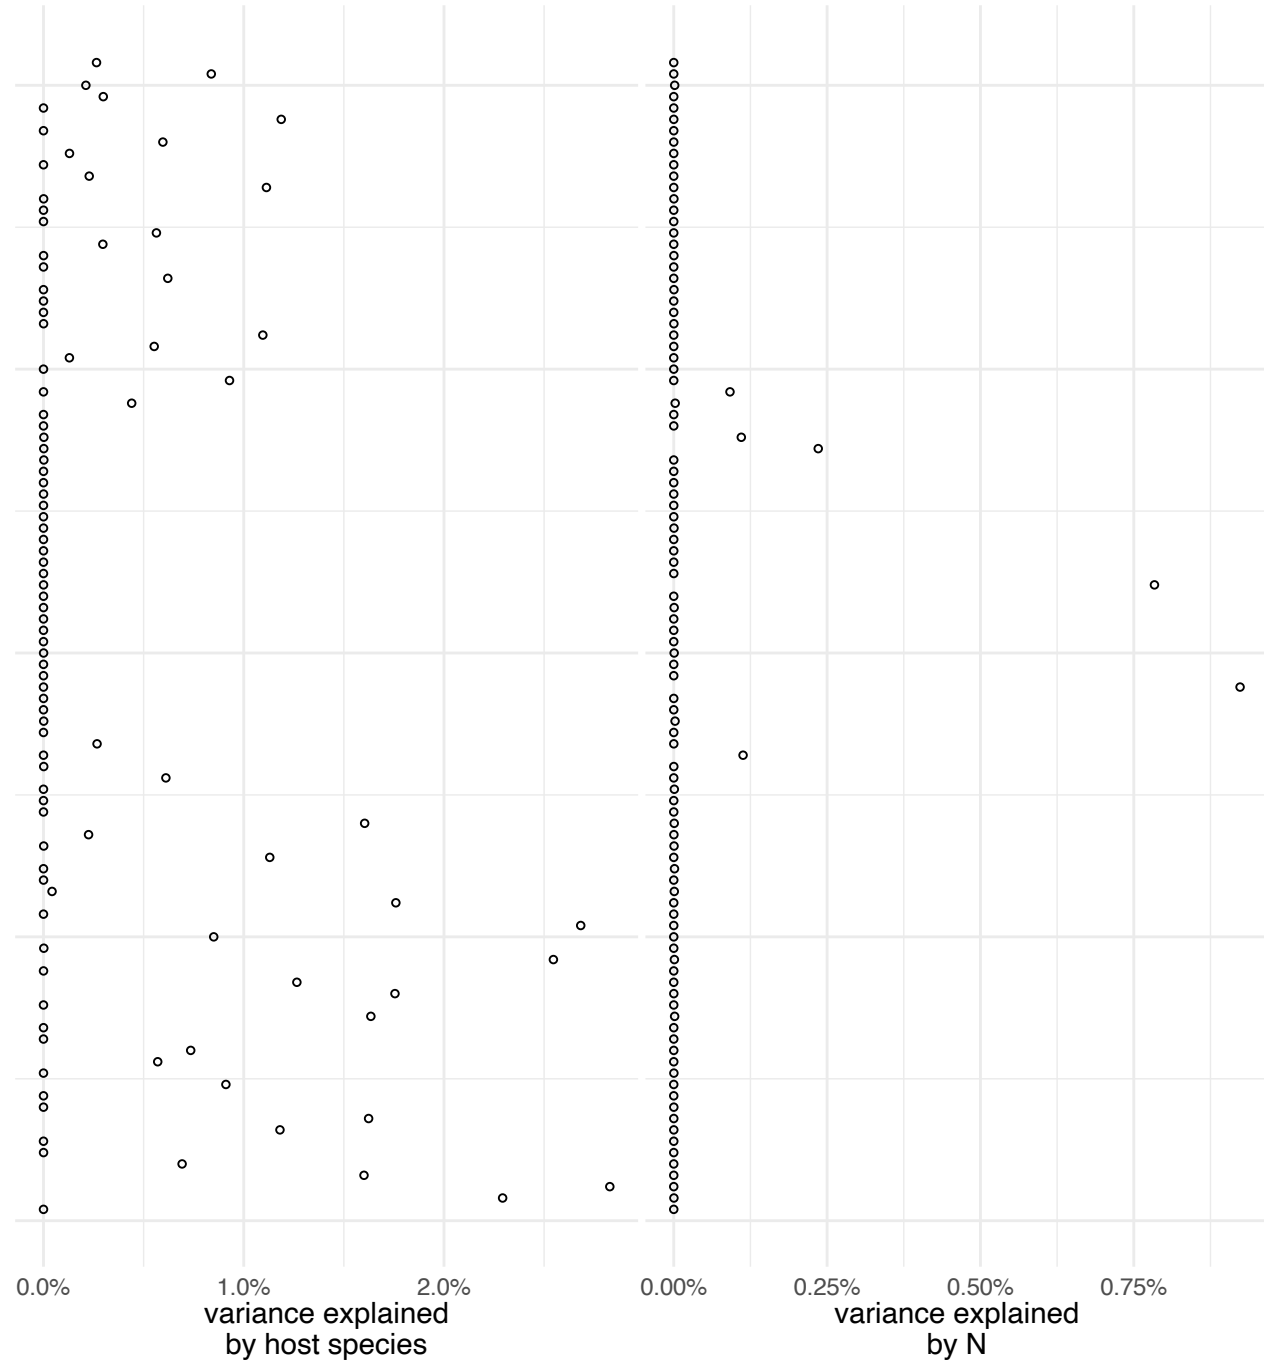

# Steroidobacter

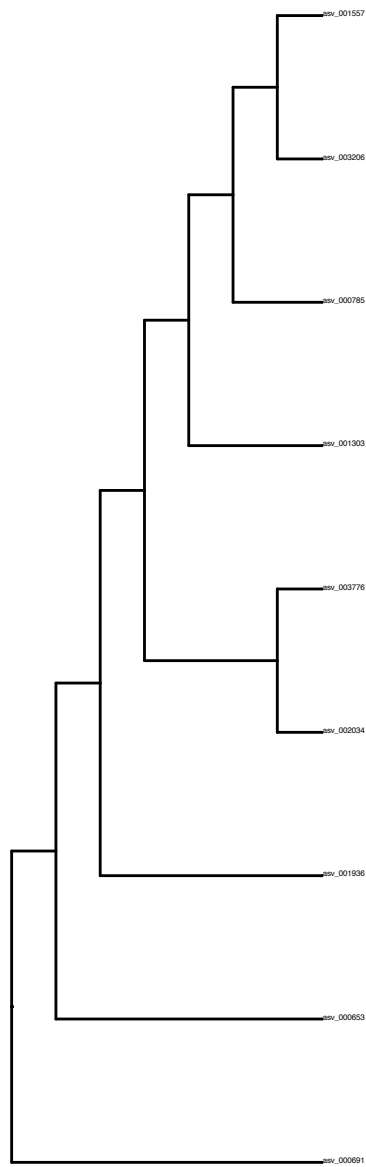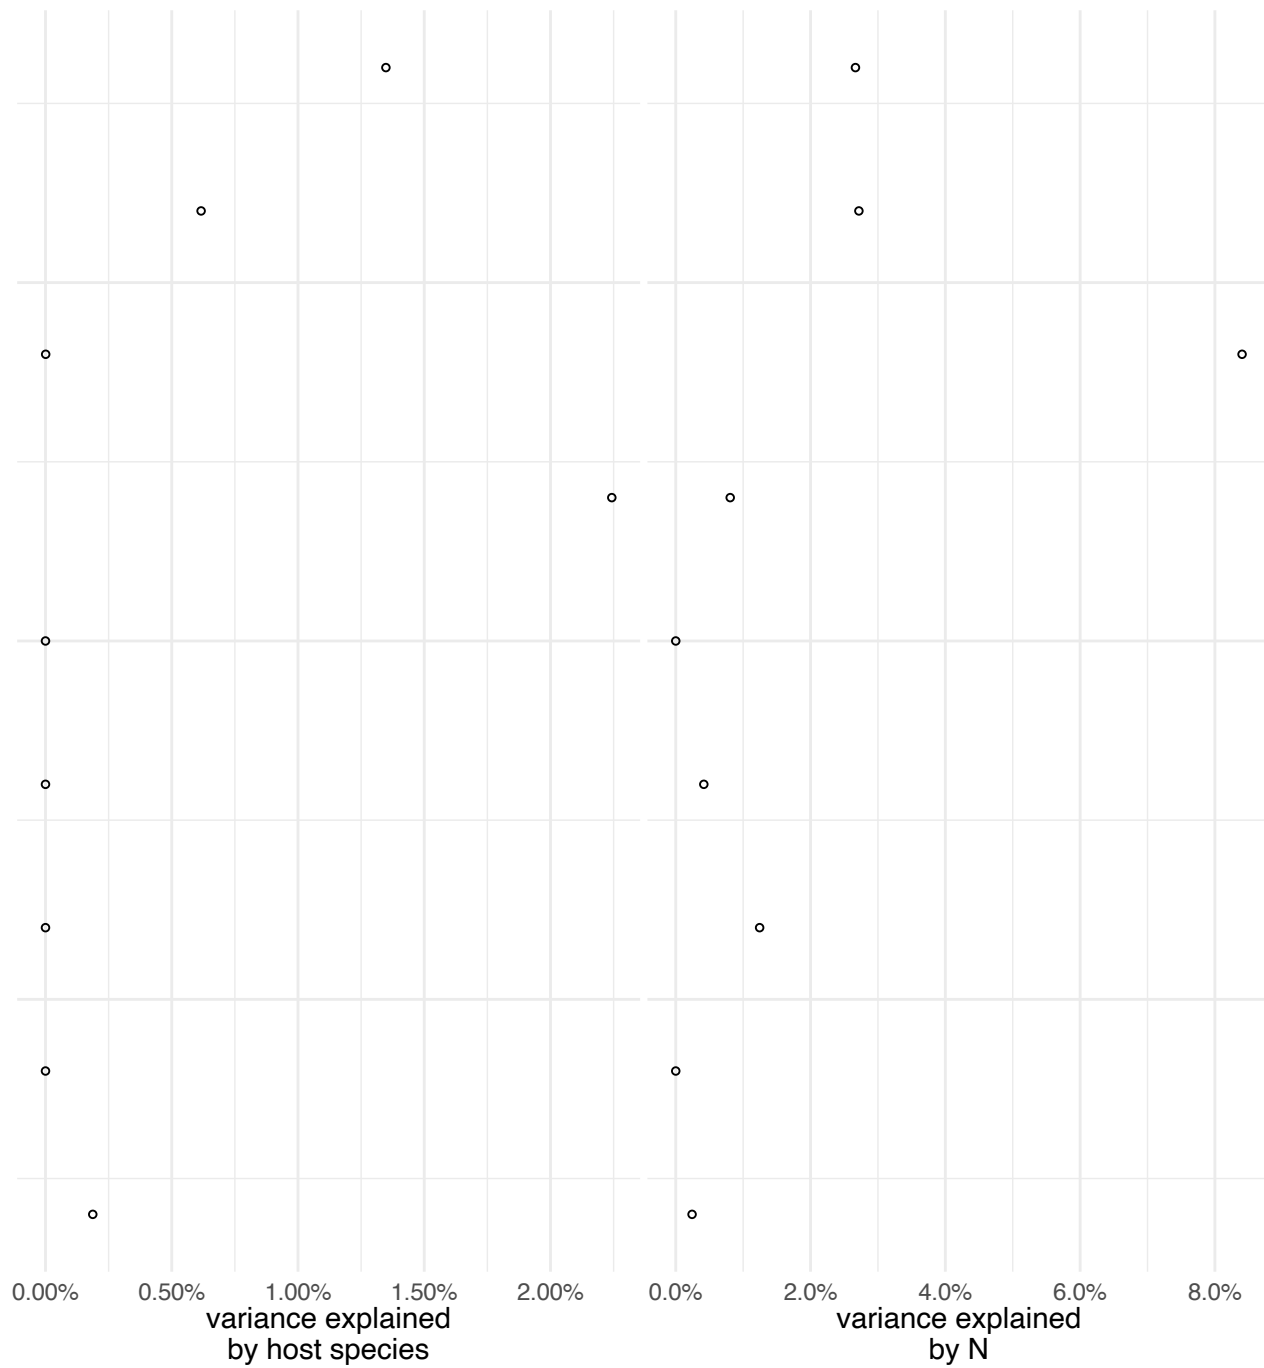

# Terrimonas

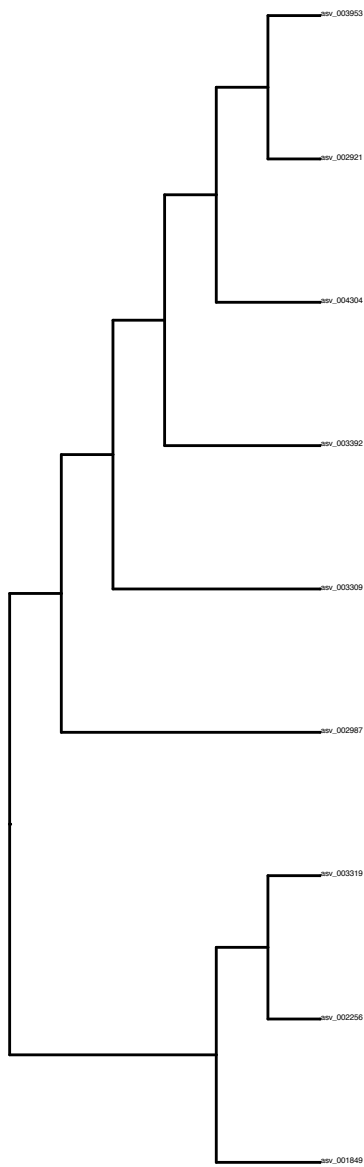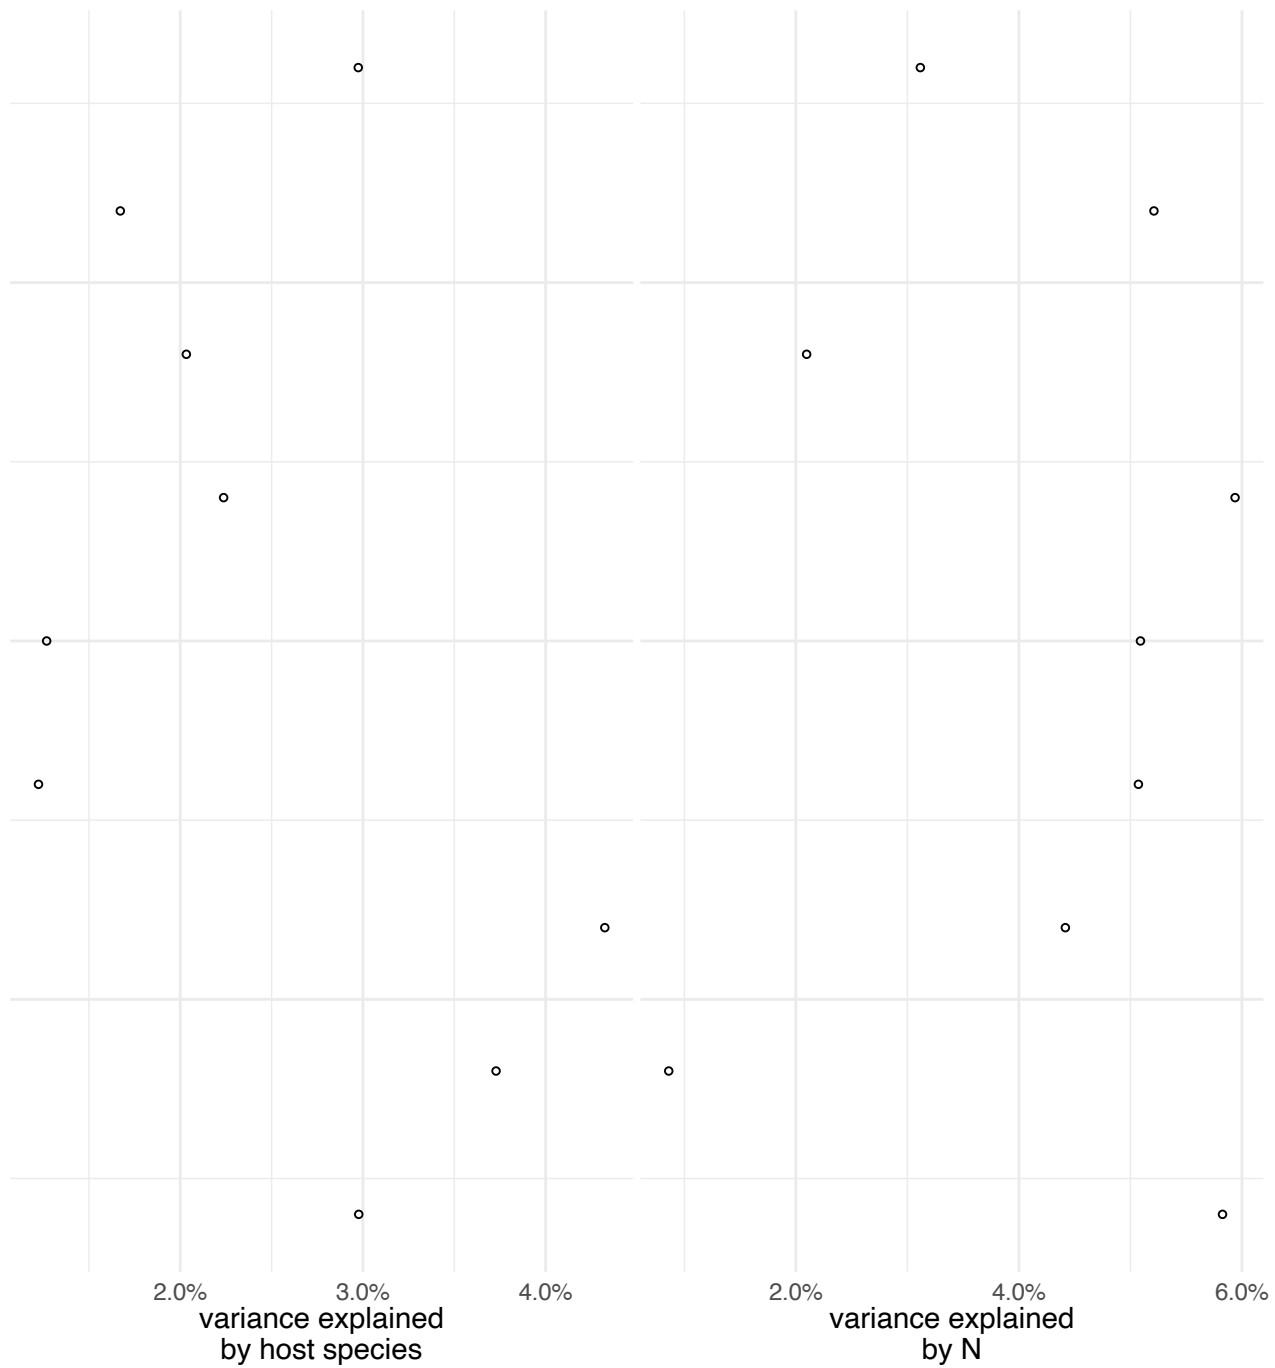

# UTBCD1

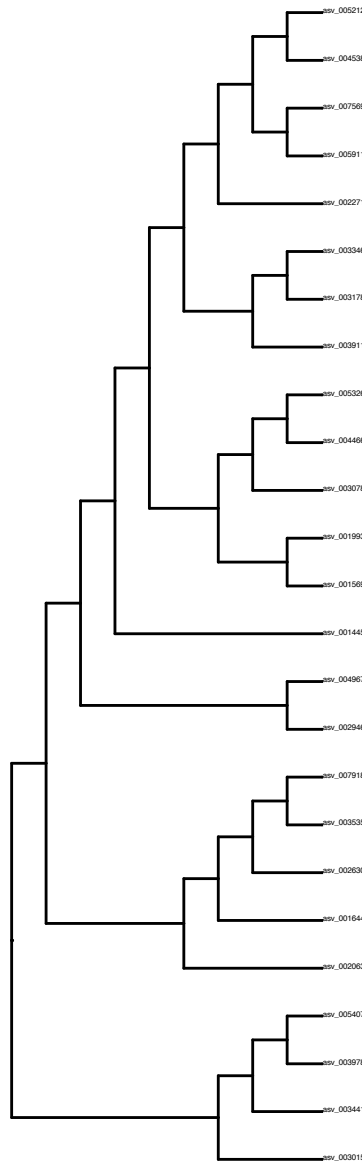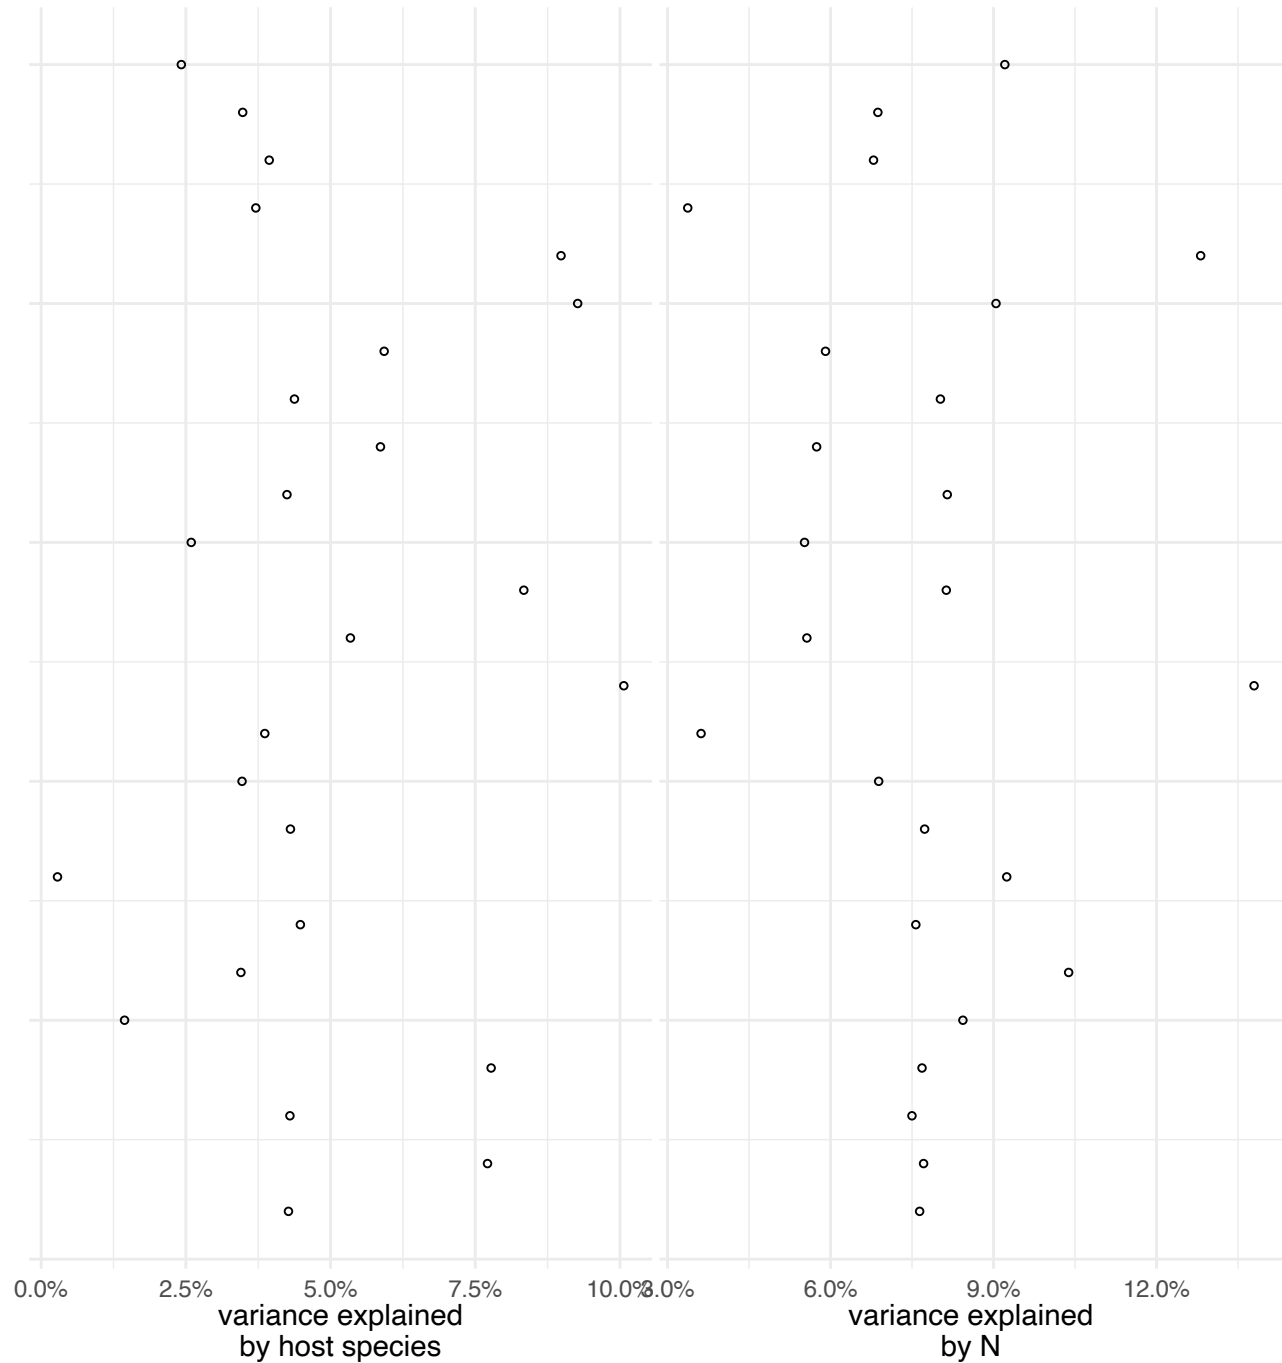



# Variovorax

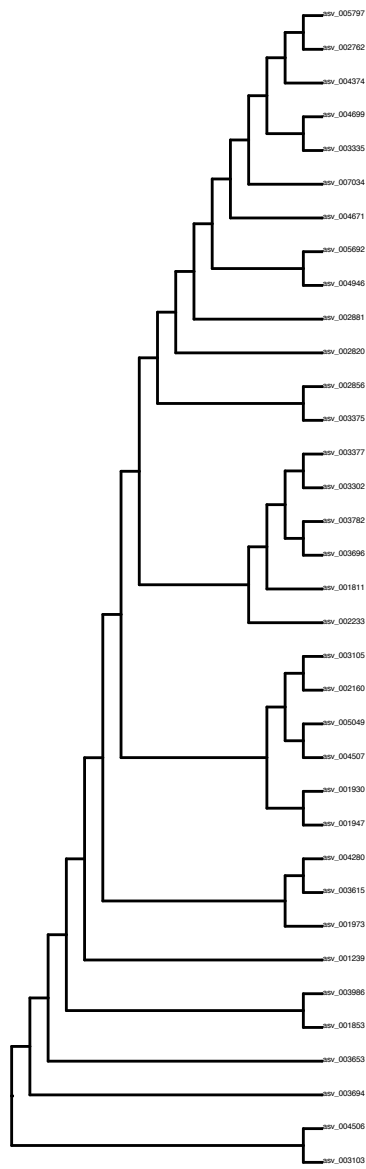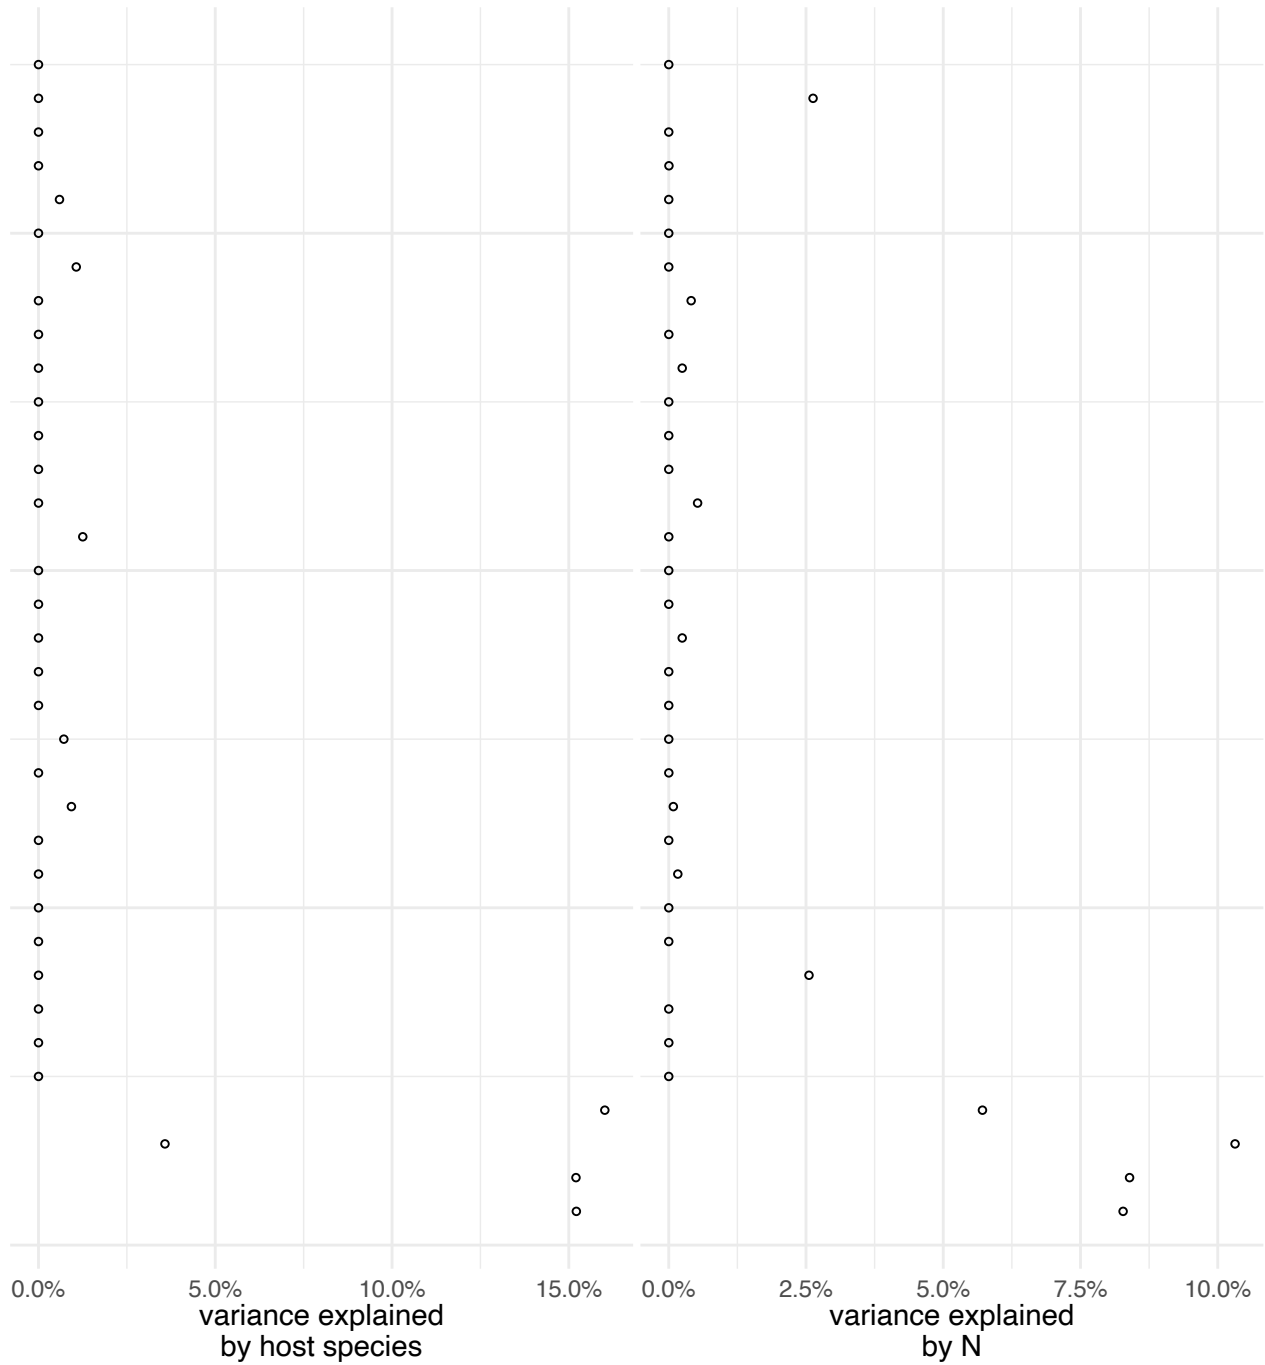

# Xenophilus

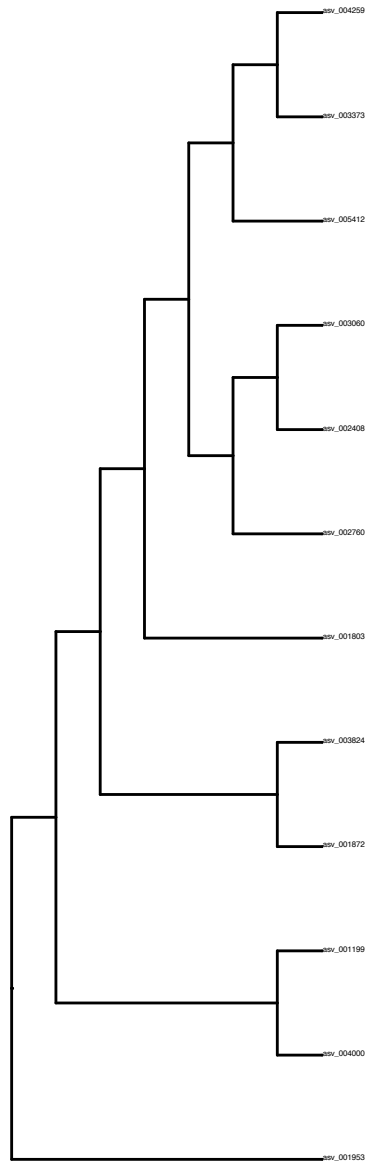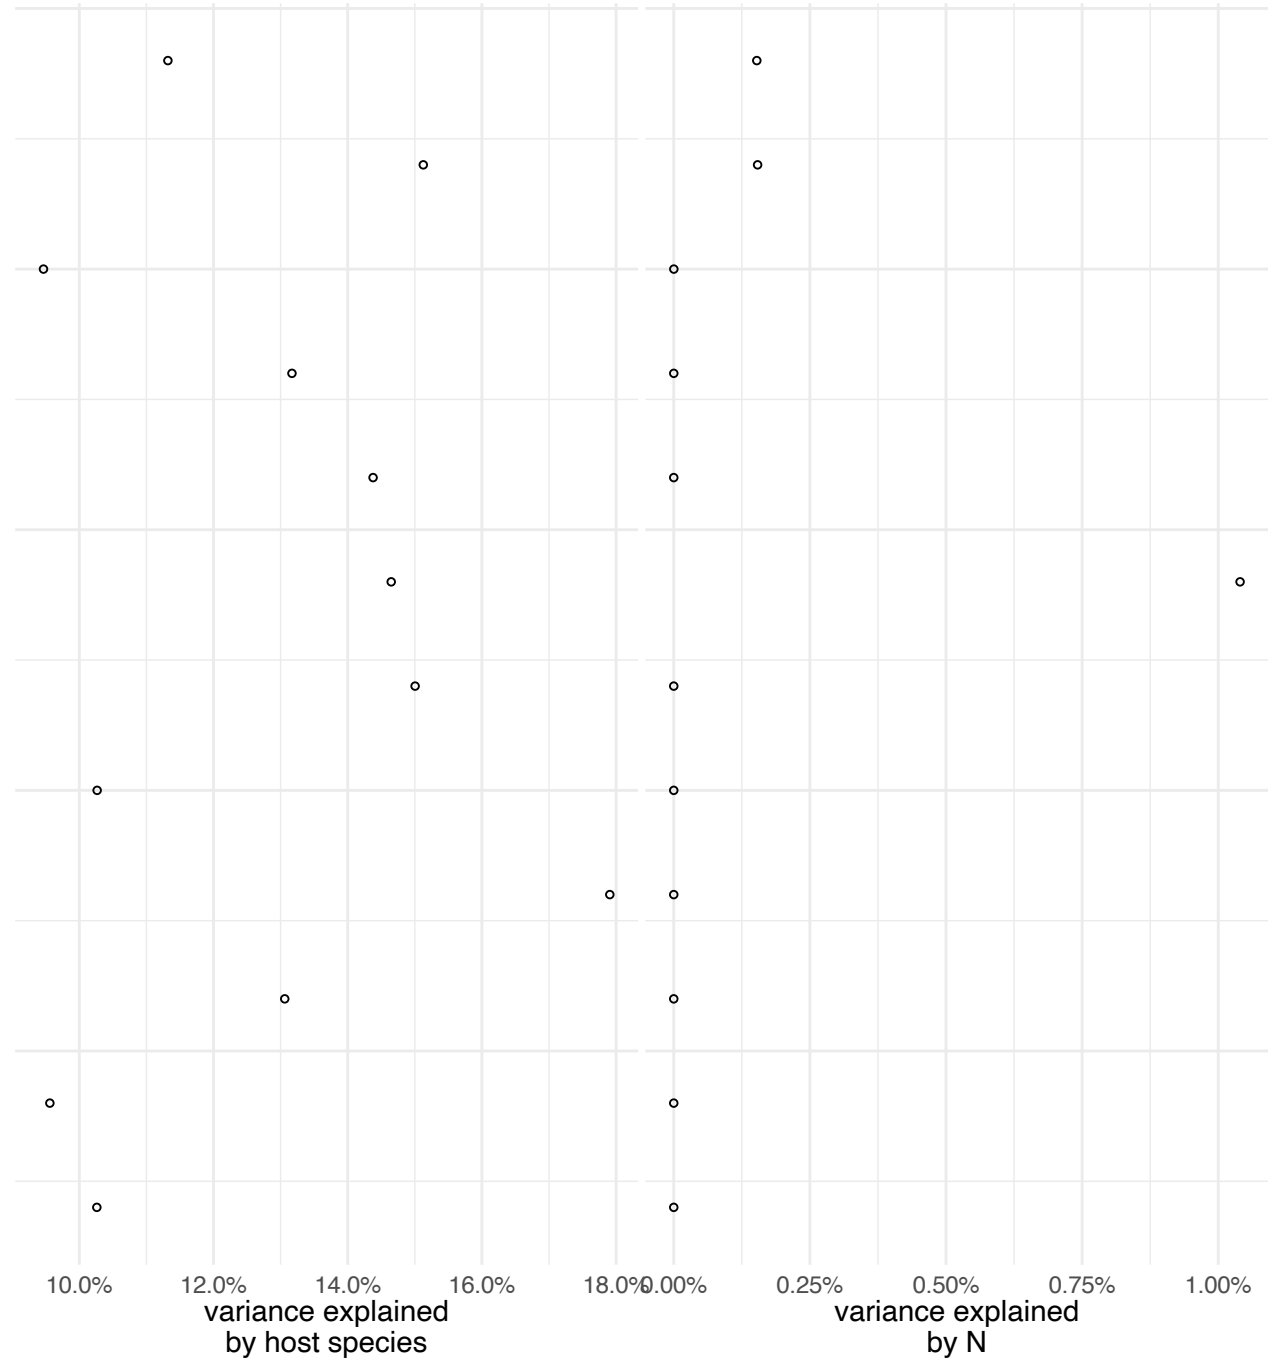

# Yersinia

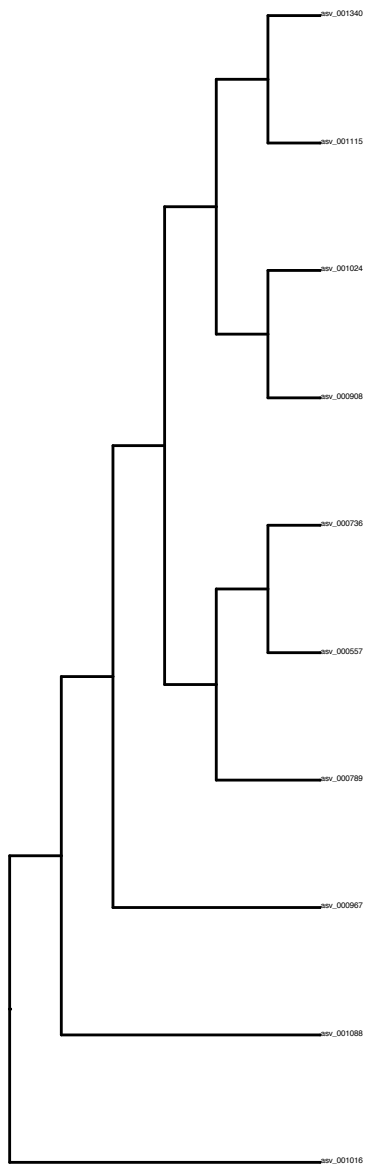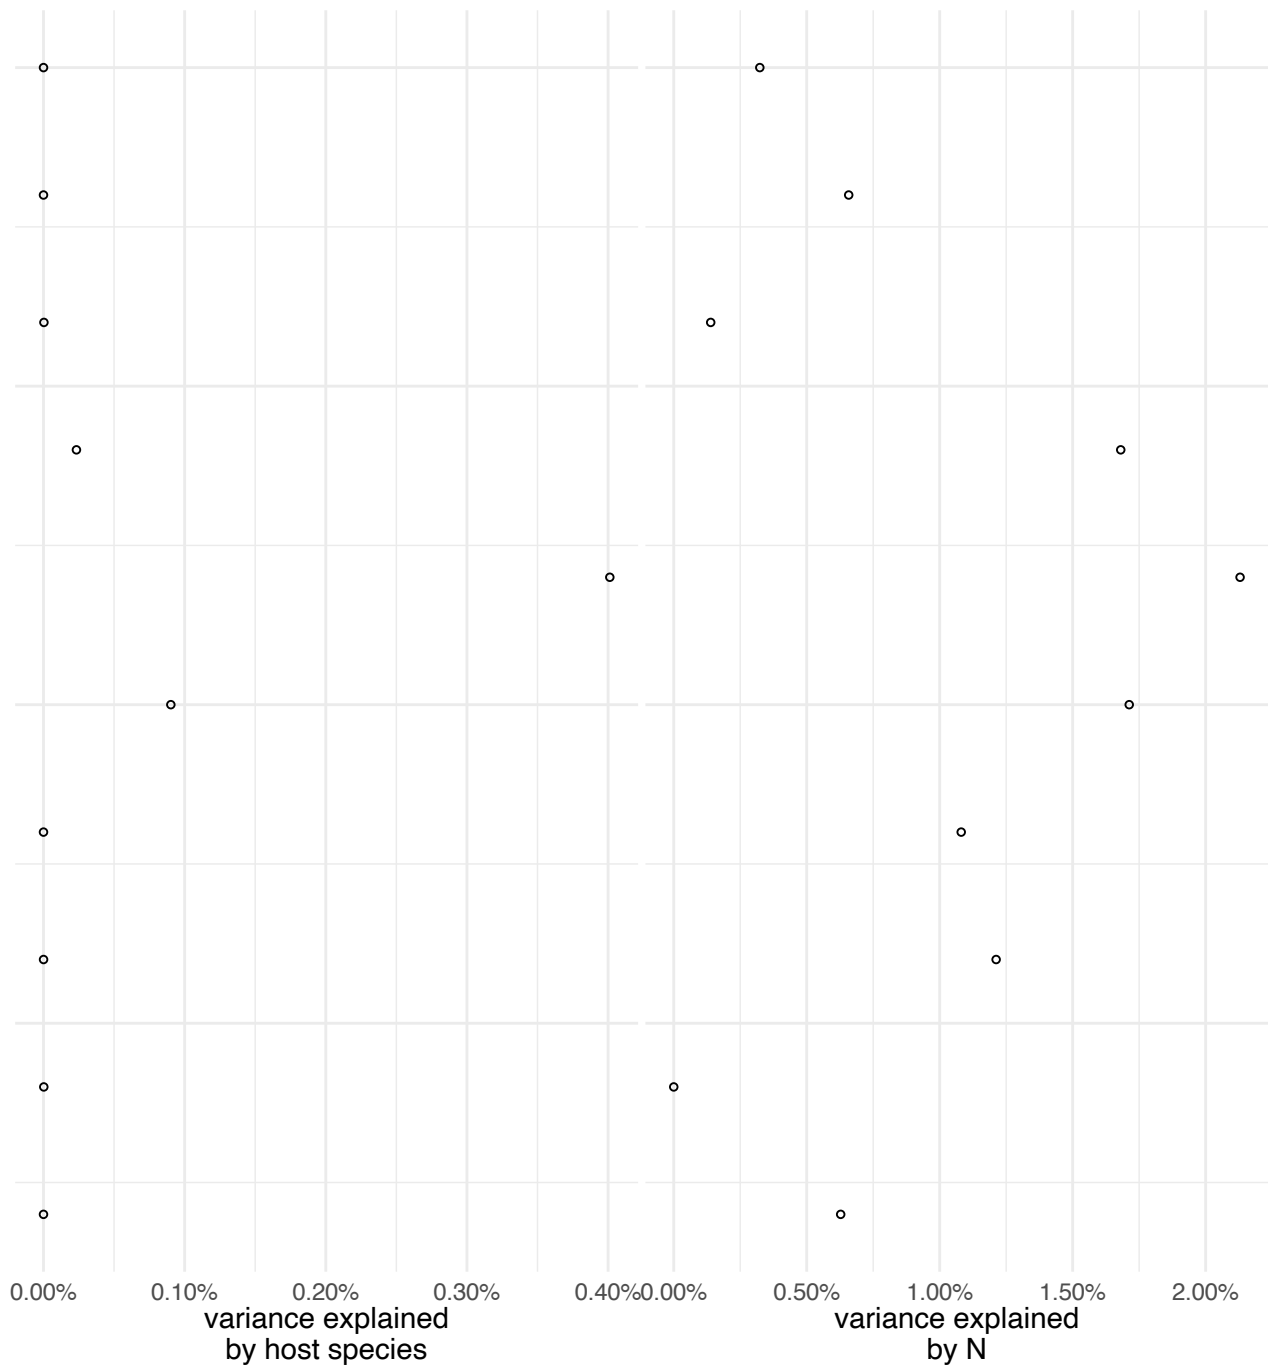

Supplement: Supplementary file [file media-2.pdf]
